# Supplementary material
Source: publisher figshare collection journal article supplement (https://future-science-group.figshare.com/ndownloader/files/28532736)
Supplement: Supplementary file 1 [file 28532736]

## Sheet: Sheet1
row.names(tT)	logFC	AveExpr	t	P.Value	adj.P.Val	B	regulated
ARHGAP31	1.24071	9.19465	15.0865	9.79906e-34	1.22721e-29	65.9839	Up-Regulated
TCF4	1.39546	10.3493	15.0512	1.24086e-33	1.22721e-29	65.7515	Up-Regulated
DOCK11	1.56354	8.4878	14.6108	2.36056e-32	1.55639e-28	62.8513	Up-Regulated
GNB4	1.50713	9.56655	14.4729	5.95096e-32	2.41034e-28	61.9408	Up-Regulated
FPR3	2.14101	8.31351	14.4694	6.09287e-32	2.41034e-28	61.9176	Up-Regulated
RASSF2	1.71132	9.42492	14.3626	1.24749e-31	4.11256e-28	61.2119	Up-Regulated
SLCO2B1	1.66136	10.2875	14.046	1.04533e-30	2.67069e-27	59.1183	Up-Regulated
WIPF1	1.38666	10.4817	14.0412	1.08016e-30	2.67069e-27	59.086	Up-Regulated
ARHGEF6	1.51656	8.60807	13.9011	2.77052e-30	6.08899e-27	58.1582	Up-Regulated
MS4A7	1.91401	8.82663	13.7354	8.44442e-30	1.67031e-26	57.0603	Up-Regulated
LCP2	1.57822	8.53881	13.5643	2.67056e-29	4.54002e-26	55.9261	Up-Regulated
CCDC80	2.17908	11.9859	13.5597	2.75431e-29	4.54002e-26	55.8957	Up-Regulated
CCR1	1.7604	7.34265	13.5443	3.05387e-29	4.64658e-26	55.794	Up-Regulated
RECK	1.47745	8.0777	13.5332	3.29111e-29	4.64987e-26	55.7203	Up-Regulated
ADAP2	1.18997	7.53811	13.4432	6.03142e-29	7.95343e-26	55.1235	Up-Regulated
RASGRP4	1.60881	5.20908	13.3169	1.41217e-28	1.7458e-25	54.2853	Up-Regulated
PLEKHO2	1.05381	10.1267	13.2956	1.62959e-28	1.89607e-25	54.1442	Up-Regulated
ZNF521	1.6221	8.07012	13.2794	1.81728e-28	1.99699e-25	54.0368	Up-Regulated
FMNL3	1.05736	9.94997	13.2358	2.43655e-28	2.53657e-25	53.7479	Up-Regulated
ARSB	1.03232	8.53489	13.1476	4.41347e-28	4.36492e-25	53.1626	Up-Regulated
LST001	2.05188	4.34152	13.0465	9.55731e-28	9.00208e-25	52.4018	Up-Regulated
FLI1	1.47589	8.43926	13.0219	1.02882e-27	9.25002e-25	52.3287	Up-Regulated
GAS7	1.45303	10.0716	13.0093	1.11951e-27	9.33797e-25	52.2454	Up-Regulated
DOCK2	2.05351	8.64122	13.0075	1.13302e-27	9.33797e-25	52.2336	Up-Regulated
PIK3R5	1.81369	7.73229	12.9176	2.07561e-27	1.56246e-24	51.6371	Up-Regulated
FOLR2	1.98408	7.86756	12.9153	2.10759e-27	1.56246e-24	51.6221	Up-Regulated
ATP8B4	1.53245	6.03365	12.9135	2.13278e-27	1.56246e-24	51.6103	Up-Regulated
MPEG1	1.93913	9.02277	12.9041	2.27245e-27	1.60533e-24	51.5478	Up-Regulated
LOC115481	1.49673	9.52692	12.897	2.38417e-27	1.62617e-24	51.5006	Up-Regulated
ECM2	1.64981	8.24454	12.8749	2.76572e-27	1.82353e-24	51.3543	Up-Regulated
LHFP	1.31513	9.91923	12.8656	2.94494e-27	1.87606e-24	51.2924	Up-Regulated
MSR1	1.94047	9.27149	12.8611	3.03508e-27	1.87606e-24	51.2627	Up-Regulated
LOC64166	1.71007	9.48497	12.8497	3.27791e-27	1.96476e-24	51.1869	Up-Regulated
EVI2A	1.80635	7.8784	12.8439	3.40772e-27	1.98249e-24	51.1486	Up-Regulated
PDCD1LG2	1.93642	5.41262	12.8334	3.65871e-27	2.06769e-24	51.0786	Up-Regulated
CYBB	1.91989	9.73705	12.7871	4.99553e-27	2.62285e-24	50.7717	Up-Regulated
DAB2	1.16062	10.7288	12.787	4.99784e-27	2.62285e-24	50.7712	Up-Regulated
NCKAP1L	1.9033	8.69487	12.7858	5.03884e-27	2.62285e-24	50.7632	Up-Regulated
TNFSF8	2.3308	4.86328	12.7644	5.81805e-27	2.9508e-24	50.6215	Up-Regulated
LILRB2	1.81966	6.94813	12.7185	7.92311e-27	3.91798e-24	50.3172	Up-Regulated
LOC157759	1.81822	9.09615	12.7096	8.41301e-27	3.96471e-24	50.2581	Up-Regulated
PLEK	1.90129	8.18232	12.7095	8.41849e-27	3.96471e-24	50.2574	Up-Regulated
FBN1	1.90363	12.2798	12.6773	1.04555e-26	4.80952e-24	50.0439	Up-Regulated
MS4A4	1.934	8.08885	12.666	1.128e-26	5.07086e-24	49.9691	Up-Regulated
GPNMB	1.87124	11.898	12.6522	1.23739e-26	5.43902e-24	49.8779	Up-Regulated
OLFML1	1.52258	8.16615	12.608	1.66622e-26	7.01232e-24	49.5847	Up-Regulated
SAMHD1	1.63167	9.37821	12.6005	1.75217e-26	7.2204e-24	49.5352	Up-Regulated
CD53	1.82477	9.64658	12.5266	2.88016e-26	1.15181e-23	49.0454	Up-Regulated
LOC727797	1.98578	6.97097	12.525	2.91156e-26	1.15181e-23	49.0347	Up-Regulated
C3AR1	1.74073	8.25744	12.5084	3.25372e-26	1.26193e-23	48.9253	Up-Regulated
CELF2	1.69688	8.7974	12.4831	3.858e-26	1.46752e-23	48.7574	Up-Regulated
MNDA	1.97989	7.40161	12.4543	4.68065e-26	1.74685e-23	48.5669	Up-Regulated
CASS4	1.90531	4.69915	12.4635	4.7759e-26	1.74939e-23	48.548	Up-Regulated
SAMSN1	1.79847	7.46831	12.4411	5.11539e-26	1.83968e-23	48.4794	Up-Regulated
LAIR1	1.64001	8.88758	12.4192	5.92722e-26	2.09358e-23	48.3343	Up-Regulated
F13A1	2.13758	9.97996	12.3878	7.31663e-26	2.539e-23	48.1268	Up-Regulated
LRRC25	1.50315	7.20468	12.3671	8.4102e-26	2.86817e-23	47.9895	Up-Regulated
ITGA4	1.7864	8.27552	12.3522	9.29387e-26	3.11026e-23	47.891	Up-Regulated
GPR65	1.62682	6.03555	12.35	9.43456e-26	3.11026e-23	47.8762	Up-Regulated
CD4	1.47276	10.1745	12.3171	1.17623e-25	3.81408e-23	47.6589	Up-Regulated
MXRA4~withdrawn	1.26725	11.0178	12.3025	1.29742e-25	4.13919e-23	47.5623	Up-Regulated
CSF1R	1.6125	10.1517	12.2956	1.35892e-25	4.26657e-23	47.5167	Up-Regulated
ZCCHC24	1.33128	10.2065	12.27	1.61377e-25	4.98757e-23	47.3473	Up-Regulated
CRISPLD2	1.59131	11.8387	12.2534	1.80404e-25	5.48982e-23	47.2375	Up-Regulated
EVI2B	1.79209	8.51324	12.2275	2.14692e-25	6.43427e-23	47.066	Up-Regulated
CD86	1.65157	7.88971	12.2187	2.27716e-25	6.72273e-23	47.008	Up-Regulated
SIGLEC5	2.093	5.33995	12.2261	2.34136e-25	6.81059e-23	46.9816	Up-Regulated
CD163	2.17209	10.0482	12.2058	2.48347e-25	7.11928e-23	46.9225	Up-Regulated
FCU	1.71384	6.37941	12.1806	2.94192e-25	8.31303e-23	46.7556	Up-Regulated
IL16	1.67568	8.91168	12.1685	3.18971e-25	8.88627e-23	46.6759	Up-Regulated
GIMAP4	1.41235	8.90947	12.1643	3.28099e-25	9.0136e-23	46.6481	Up-Regulated
IL10RA	1.49685	9.11119	12.1505	3.60054e-25	9.75598e-23	46.5565	Up-Regulated
GLT8D2	1.46567	8.62766	12.1275	4.20026e-25	1.12272e-22	46.4047	Up-Regulated
SLC9A9	1.57599	6.91002	12.1119	4.66317e-25	1.22983e-22	46.3017	Up-Regulated
DCN	1.72783	13.6459	12.1073	4.80983e-25	1.25182e-22	46.2712	Up-Regulated
FBXL7	1.29532	8.18459	12.0517	6.98354e-25	1.79395e-22	45.9037	Up-Regulated
LILRB1	1.78275	6.57845	12.042	7.45244e-25	1.88986e-22	45.8397	Up-Regulated
LOC149730	1.26549	9.80254	11.9793	1.13419e-24	2.83978e-22	45.4259	Up-Regulated
PTPRC	2.22975	9.52841	11.9698	1.20879e-24	2.98873e-22	45.3631	Up-Regulated
DLC1	1.21139	9.6582	11.9605	1.28651e-24	3.14163e-22	45.3017	Up-Regulated
HCLS1	1.57051	9.92536	11.948	1.39874e-24	3.37403e-22	45.2193	Up-Regulated
LOC147644	1.66429	5.79659	11.9455	1.42238e-24	3.38971e-22	45.2028	Up-Regulated
NRK	2.33292	6.04632	11.9457	1.52744e-24	3.55445e-22	45.1337	Up-Regulated
FAM198B	1.29168	10.7279	11.9292	1.58668e-24	3.64937e-22	45.0951	Up-Regulated
MEF2C	1.26329	8.99331	11.9223	1.6608e-24	3.77594e-22	45.0501	Up-Regulated
ZFPM2	1.76926	6.93811	11.9043	1.87442e-24	4.21319e-22	44.9308	Up-Regulated
GLIPR1	1.53544	9.28428	11.8991	1.94063e-24	4.313e-22	44.8966	Up-Regulated
GLIPR2	1.40103	9.11107	11.8776	2.24015e-24	4.92336e-22	44.7552	Up-Regulated
PALM2-AKAP2	1.03334	10.201	11.8724	2.3197e-24	5.04217e-22	44.7208	Up-Regulated
GPR34	1.85785	6.76858	11.8669	2.40731e-24	5.14846e-22	44.6843	Up-Regulated
LOC125450	2.39789	8.41446	11.8661	2.42066e-24	5.14846e-22	44.6788	Up-Regulated
FAM49A	1.66208	6.50731	11.8594	2.53104e-24	5.32595e-22	44.6349	Up-Regulated
WT1	2.35557	5.0919	11.9394	2.69109e-24	5.60314e-22	44.5838	Up-Regulated
PODN	1.59899	10.5488	11.8463	2.76219e-24	5.69126e-22	44.5488	Up-Regulated
LOC102724424	1.98856	6.47	11.8399	2.88333e-24	5.87961e-22	44.5065	Up-Regulated
KIAA0366	1.81462	4.78329	11.8409	3.07511e-24	6.20671e-22	44.4443	Up-Regulated
FAM78A	1.44919	7.51305	11.8195	3.30459e-24	6.6025e-22	44.3721	Up-Regulated
OLFML3	1.56038	10.0263	11.817	3.36051e-24	6.6471e-22	44.3556	Up-Regulated
KDELC1	1.09144	7.5353	11.784	4.19148e-24	8.20866e-22	44.1379	Up-Regulated
FERMT2	1.30854	9.97346	11.765	4.75947e-24	9.14003e-22	44.0127	Up-Regulated
MERTK	1.40296	7.6826	11.7545	5.1057e-24	9.69911e-22	43.9435	Up-Regulated
RBMS3	1.76969	5.24645	11.7532	5.14867e-24	9.69911e-22	43.9352	Up-Regulated
FPR1	1.84969	7.89176	11.7493	5.28461e-24	9.86128e-22	43.9095	Up-Regulated
ARHGAP25	1.46725	8.02831	11.7466	5.38181e-24	9.94881e-22	43.8916	Up-Regulated
HEG1	1.29659	10.8186	11.7334	5.88036e-24	1.07698e-21	43.8043	Up-Regulated
DSE	1.09761	9.42187	11.727	6.13428e-24	1.11318e-21	43.7626	Up-Regulated
MARCH1	1.60721	5.93688	11.7139	6.69934e-24	1.20466e-21	43.6758	Up-Regulated
BNC2	1.93069	8.01072	11.7079	6.97275e-24	1.24253e-21	43.6364	Up-Regulated
CD84	2.22724	6.28041	11.6772	8.55691e-24	1.49784e-21	43.4347	Up-Regulated
DFNB74	1.54838	9.79881	11.6635	9.38046e-24	1.62759e-21	43.3441	Up-Regulated
PDGFRA	1.63644	10.8691	11.66	9.60259e-24	1.65165e-21	43.3211	Up-Regulated
STARD8	1.21123	7.60347	11.6387	1.10692e-23	1.88749e-21	43.181	Up-Regulated
POLYDOM	2.01601	9.2459	11.6321	1.15707e-23	1.93956e-21	43.1373	Up-Regulated
ZEB1	1.23061	9.98832	11.6214	1.24201e-23	2.06445e-21	43.0675	Up-Regulated
TM6SF1	1.33644	6.80829	11.6121	1.32154e-23	2.17834e-21	43.0064	Up-Regulated
TLR4	1.29408	8.49884	11.6021	1.41355e-23	2.27317e-21	42.9401	Up-Regulated
RNASE6	1.55955	8.25951	11.5986	1.44688e-23	2.30801e-21	42.9171	Up-Regulated
NEXN	1.75877	8.51908	11.5836	1.59923e-23	2.53062e-21	42.8185	Up-Regulated
RFTN2	1.17513	6.19971	11.5745	1.69898e-23	2.66713e-21	42.7589	Up-Regulated
KLHL6	1.88313	7.80106	11.5714	1.73418e-23	2.70094e-21	42.7387	Up-Regulated
IL1R1	1.47426	11.4808	11.5667	1.79017e-23	2.76637e-21	42.7073	Up-Regulated
C1S	1.58329	13.3485	11.5613	1.85587e-23	2.84567e-21	42.6718	Up-Regulated
NLRC4	1.52295	5.53698	11.5587	1.88746e-23	2.87184e-21	42.6552	Up-Regulated
PTPRO	1.66117	5.95625	11.5563	1.91794e-23	2.89594e-21	42.6394	Up-Regulated
SCIMP	1.96532	4.64277	11.5547	1.9395e-23	2.90632e-21	42.6284	Up-Regulated
LOC90369	1.58406	11.1308	11.5452	2.06569e-23	3.07214e-21	42.5663	Up-Regulated
RFTN1	1.1668	9.9349	11.5291	2.29997e-23	3.39504e-21	42.4604	Up-Regulated
CNN3	1.04067	11.5993	11.5223	2.40631e-23	3.52569e-21	42.4159	Up-Regulated
FSTL1	1.38508	13.1577	11.5174	2.48704e-23	3.61718e-21	42.3834	Up-Regulated
CR1	2.72389	6.25528	11.5095	2.6207e-23	3.78375e-21	42.3318	Up-Regulated
ADAMTSL1	1.7667	7.03605	11.504	2.71942e-23	3.84225e-21	42.2954	Up-Regulated
BOC	1.5571	9.5571	11.5039	2.72073e-23	3.84225e-21	42.2949	Up-Regulated
SNX20	1.86304	5.51149	11.5032	2.73428e-23	3.84225e-21	42.29	Up-Regulated
LOC100421066	1.73223	5.54603	11.5029	2.73891e-23	3.84225e-21	42.2883	Up-Regulated
LY96	1.38606	6.91278	11.5071	2.84331e-23	3.96061e-21	42.2529	Up-Regulated
LOC105371602	1.73591	8.22393	11.4867	3.0516e-23	4.22103e-21	42.1818	Up-Regulated
SRGN	1.51903	10.8065	11.4687	3.43996e-23	4.72517e-21	42.0638	Up-Regulated
AP1S2	1.15603	8.12868	11.463	3.573e-23	4.87406e-21	42.0264	Up-Regulated
LOC154412	1.04441	10.3724	11.4329	4.36832e-23	5.87792e-21	41.8284	Up-Regulated
ST8SIA4	1.45799	7.92059	11.4189	4.79538e-23	6.40896e-21	41.7365	Up-Regulated
LILRB5	2.08122	5.58287	11.4195	5.09257e-23	6.76047e-21	41.6787	Up-Regulated
GIMAP6	1.50693	8.3364	11.4031	5.32719e-23	6.97827e-21	41.6329	Up-Regulated
HAVCR2	1.5547	8.39061	11.3923	5.72438e-23	7.44923e-21	41.562	Up-Regulated
SASH3	1.73181	8.35241	11.3857	5.98204e-23	7.7038e-21	41.5187	Up-Regulated
PLXDC2	1.57553	9.15009	11.3845	6.0268e-23	7.7038e-21	41.5113	Up-Regulated
TLR7-like	1.97904	6.08028	11.3843	6.03685e-23	7.7038e-21	41.5097	Up-Regulated
LOC92435	1.91501	2.54002	11.379	6.66251e-23	8.44772e-21	41.414	Up-Regulated
BCL2	1.41779	7.92681	11.3648	6.87377e-23	8.66007e-21	41.3818	Up-Regulated
CMAHP	1.31857	7.48287	11.3618	7.00998e-23	8.77579e-21	41.3624	Up-Regulated
MOXD1	1.79239	9.59163	11.3604	7.07679e-23	8.8037e-21	41.3531	Up-Regulated
WDFY4	2.30724	7.62957	11.3385	8.19007e-23	1.00621e-20	41.2091	Up-Regulated
EPB41L2	1.04625	10.6698	11.3236	9.0389e-23	1.10364e-20	41.112	Up-Regulated
SIRPB2	1.76129	5.99684	11.316	9.50685e-23	1.15365e-20	41.0623	Up-Regulated
SERPINF1	1.68596	12.2343	11.3096	9.92138e-23	1.18955e-20	41.0202	Up-Regulated
CXORF21	1.78711	5.19661	11.3096	9.92295e-23	1.18955e-20	41.0201	Up-Regulated
CLIC2	1.4236	8.01561	11.295	1.09342e-22	1.30288e-20	40.9244	Up-Regulated
a1/3GTP	1.66012	6.81087	11.287	1.15348e-22	1.36621e-20	40.8718	Up-Regulated
VSTM4	1.27858	8.88032	11.2823	1.18972e-22	1.40075e-20	40.8413	Up-Regulated
LAPTM5	1.42816	12.1638	11.276	1.24108e-22	1.45258e-20	40.7996	Up-Regulated
CMKLR1	1.64616	8.17395	11.2663	1.32385e-22	1.54034e-20	40.736	Up-Regulated
EMILIN2	1.1016	8.83818	11.2628	1.35493e-22	1.56728e-20	40.7132	Up-Regulated
DHRD	1.71248	10.9385	11.2598	1.38208e-22	1.58939e-20	40.6936	Up-Regulated
BEST1	1.2069	5.48363	11.2547	1.42931e-22	1.62973e-20	40.6605	Up-Regulated
LOC221511	1.56418	12.3343	11.2543	1.43364e-22	1.62973e-20	40.6575	Up-Regulated
LOC55873	1.39587	12.9324	11.2525	1.45028e-22	1.63923e-20	40.6462	Up-Regulated
ADGRA2	1.16318	10.8695	11.2298	1.6864e-22	1.88458e-20	40.4976	Up-Regulated
BTK	1.89027	7.21643	11.2269	1.71965e-22	1.91094e-20	40.4783	Up-Regulated
FAM26E	1.48912	6.8001	11.2239	1.75371e-22	1.9379e-20	40.459	Up-Regulated
CXCL12	1.97957	10.0968	11.2214	1.78372e-22	1.96011e-20	40.4423	Up-Regulated
NFAM1	1.36734	8.03131	11.2161	1.84779e-22	2.0193e-20	40.4075	Up-Regulated
LOC115806	2.16229	5.71196	11.212	1.8981e-22	2.06288e-20	40.3811	Up-Regulated
IKZF1	1.92067	7.97983	11.2031	2.01431e-22	2.16844e-20	40.3225	Up-Regulated
LOC121318	1.56109	6.76091	11.2029	2.01715e-22	2.16844e-20	40.3211	Up-Regulated
LOC51722	1.53679	7.41716	11.1897	2.20138e-22	2.35369e-20	40.235	Up-Regulated
THC	1.53194	7.92509	11.1854	2.26545e-22	2.40917e-20	40.2068	Up-Regulated
CYTH4	1.32377	8.27166	11.1727	2.46458e-22	2.59305e-20	40.1238	Up-Regulated
NID2	1.42757	9.36122	11.1694	2.51976e-22	2.63708e-20	40.102	Up-Regulated
IL3RB	1.8163	8.31896	11.1664	2.56931e-22	2.67479e-20	40.0828	Up-Regulated
A2M	1.14495	13.7891	11.1634	2.62095e-22	2.71427e-20	40.0632	Up-Regulated
IGSF6	1.79502	6.64919	11.1574	2.72708e-22	2.80946e-20	40.0241	Up-Regulated
FCGR2A	1.53541	10.0713	11.1504	2.85809e-22	2.92287e-20	39.9778	Up-Regulated
MGC10724	1.9529	10.5345	11.1499	2.86672e-22	2.92287e-20	39.9749	Up-Regulated
WISP1	2.03739	8.15512	11.1421	3.01907e-22	3.0468e-20	39.9239	Up-Regulated
LOC116196	1.6173	5.88566	11.1306	3.25862e-22	3.27186e-20	39.8486	Up-Regulated
HLA-DMB	1.50194	10.228	11.1273	3.33093e-22	3.32757e-20	39.827	Up-Regulated
FGF7	2.01167	7.7396	11.1242	3.3998e-22	3.3793e-20	39.8069	Up-Regulated
CLEC7A	1.67336	7.46119	11.1233	3.42155e-22	3.38392e-20	39.8006	Up-Regulated
FBLN2	1.7405	11.0496	11.1185	3.53024e-22	3.47404e-20	39.7698	Up-Regulated
ADGRL4	1.12102	8.79251	11.1158	3.59391e-22	3.51919e-20	39.7522	Up-Regulated
C5AR1	1.5307	8.64277	11.1085	3.77339e-22	3.67674e-20	39.7041	Up-Regulated
SBBI42	1.51021	8.68331	11.0983	4.03805e-22	3.91532e-20	39.6374	Up-Regulated
NRROS	1.32886	6.59302	11.0962	4.09527e-22	3.95144e-20	39.6235	Up-Regulated
RGL1	1.09714	9.05809	11.0954	4.11674e-22	3.95287e-20	39.6184	Up-Regulated
STON1	1.42354	8.38575	11.0527	5.46285e-22	5.22006e-20	39.3397	Up-Regulated
OLFML2B	1.67522	10.4498	11.0453	5.73767e-22	5.45631e-20	39.2913	Up-Regulated
LOC89993	1.51398	7.15536	11.044	5.78788e-22	5.47772e-20	39.2827	Up-Regulated
C1R	1.38509	13.0247	11.0292	6.38396e-22	6.01308e-20	39.1862	Up-Regulated
ARID5B	1.00808	10.1456	11.022	6.69561e-22	6.27673e-20	39.1392	Up-Regulated
BASP1	1.40414	9.35548	11.0212	6.73143e-22	6.28056e-20	39.134	Up-Regulated
HLA-DRA	1.54736	13.748	11.0187	6.84317e-22	6.35483e-20	39.1177	Up-Regulated
SRPX	1.64016	8.69211	11.015	7.01296e-22	6.48207e-20	39.0936	Up-Regulated
LILRA6	1.90704	6.22644	11.0102	7.23893e-22	6.65981e-20	39.0624	Up-Regulated
LOC392794	1.69748	5.65183	11.0072	7.38522e-22	6.76295e-20	39.0426	Up-Regulated
PDGFRL	1.69236	8.03659	11.0044	7.52046e-22	6.85506e-20	39.0248	Up-Regulated
GAB3	1.39103	6.7704	10.9957	7.96862e-22	7.20613e-20	38.9677	Up-Regulated
SLIT3	1.8537	9.17323	10.9955	7.97848e-22	7.20613e-20	38.9665	Up-Regulated
C10ORF128	1.84196	4.27816	11.0147	8.37482e-22	7.52972e-20	38.9237	Up-Regulated
HACD4	1.42135	7.50948	10.9757	9.0961e-22	8.14122e-20	38.8374	Up-Regulated
AOAH	1.95693	6.82752	10.9735	9.23001e-22	8.22385e-20	38.823	Up-Regulated
ARMD1	1.91564	8.88521	10.9596	1.01154e-21	8.93226e-20	38.7328	Up-Regulated
DDR2	2.05436	7.38085	10.9589	1.01635e-21	8.93486e-20	38.7281	Up-Regulated
CD28	2.02064	5.47201	10.9624	1.05157e-21	9.20359e-20	38.6962	Up-Regulated
SH3BP5	1.13135	9.62754	10.9295	1.23483e-21	1.07599e-19	38.5363	Up-Regulated
SPARCL1	1.39322	12.4022	10.9144	1.364e-21	1.18333e-19	38.4383	Up-Regulated
ZNF423	1.26985	7.75114	10.9125	1.3812e-21	1.19302e-19	38.4259	Up-Regulated
MYO1F	1.39695	8.89438	10.911	1.39535e-21	1.2e-19	38.4159	Up-Regulated
C1ORF162	1.47095	8.03063	10.902	1.4806e-21	1.2678e-19	38.3575	Up-Regulated
CSF2RA	1.70191	7.50819	10.8995	1.50558e-21	1.28364e-19	38.341	Up-Regulated
PABPC4L	1.387	4.83842	10.9024	1.56253e-21	1.32647e-19	38.3061	Up-Regulated
RAB23	1.16025	8.5018	10.8841	1.66707e-21	1.40917e-19	38.2406	Up-Regulated
CTSK	1.67894	11.4531	10.8792	1.7213e-21	1.44883e-19	38.2091	Up-Regulated
CD180	1.80644	6.60438	10.8691	1.8404e-21	1.5425e-19	38.1432	Up-Regulated
IDDM21	1.84342	7.09683	10.8564	2.00139e-21	1.66334e-19	38.0606	Up-Regulated
LOC654181	1.16101	8.98884	10.8332	2.33262e-21	1.93051e-19	37.9098	Up-Regulated
IGF1	2.86397	7.74525	10.8308	2.36996e-21	1.95324e-19	37.8941	Up-Regulated
CLIC4	1.09912	11.8228	10.8219	2.51414e-21	2.06347e-19	37.8359	Up-Regulated
ERG	1.27654	8.37287	10.8134	2.65913e-21	2.17345e-19	37.7807	Up-Regulated
PILRA	1.46409	7.22849	10.8035	2.83792e-21	2.31004e-19	37.7166	Up-Regulated
RASL7B	1.18915	7.63228	10.7963	2.97711e-21	2.41341e-19	37.6695	Up-Regulated
DOK2	1.37522	7.46035	10.7924	3.05288e-21	2.46473e-19	37.6447	Up-Regulated
ARHGAP30	1.40806	9.20474	10.7904	3.09524e-21	2.48878e-19	37.6311	Up-Regulated
LOC94105	1.34431	12.4902	10.7755	3.41434e-21	2.73423e-19	37.5345	Up-Regulated
ARL11	1.48949	5.6381	10.7737	3.45443e-21	2.75519e-19	37.523	Up-Regulated
RAB31	1.40158	11.4487	10.7555	3.89644e-21	3.08286e-19	37.4044	Up-Regulated
GAL3ST4	1.20039	7.93214	10.7477	4.09978e-21	3.218e-19	37.3543	Up-Regulated
TMEM119	1.59606	10.149	10.7235	4.81127e-21	3.76154e-19	37.1967	Up-Regulated
LILRB4	1.75942	7.94153	10.7155	5.06925e-21	3.94763e-19	37.1452	Up-Regulated
CD226	1.90553	3.92833	10.7168	5.3042e-21	4.1144e-19	37.1024	Up-Regulated
PPAP2B	1.02869	10.1671	10.7078	5.33547e-21	4.12249e-19	37.0948	Up-Regulated
LOC221510	1.4532	12.037	10.6968	5.73366e-21	4.39117e-19	37.0239	Up-Regulated
PDE1A	1.34793	7.59848	10.6967	5.73974e-21	4.39117e-19	37.0229	Up-Regulated
NCAM2	1.88448	4.55818	10.7039	5.77201e-21	4.39117e-19	37.0191	Up-Regulated
FCER1G	1.41312	9.08427	10.696	5.7648e-21	4.39117e-19	37.0186	Up-Regulated
PDE4B	1.39917	8.09407	10.6946	5.8176e-21	4.4089e-19	37.0096	Up-Regulated
PMP22	1.22019	10.9588	10.6799	6.40823e-21	4.83797e-19	36.9144	Up-Regulated
LOC154180	1.54009	5.6547	10.6791	6.44354e-21	4.84613e-19	36.909	Up-Regulated
PTGS1	1.18863	8.79937	10.6756	6.5945e-21	4.94088e-19	36.8862	Up-Regulated
GAS1	2.11132	8.5466	10.6663	7.00857e-21	5.2313e-19	36.8262	Up-Regulated
SPARC	1.42864	15.6457	10.6547	7.56479e-21	5.62525e-19	36.751	Up-Regulated
FLJ34238	1.06216	8.15022	10.6461	8.00529e-21	5.93051e-19	36.6952	Up-Regulated
IL2RB	1.51612	7.6224	10.6391	8.38365e-21	6.18764e-19	36.6498	Up-Regulated
PRRX1	1.81232	9.8064	10.6351	8.60596e-21	6.28591e-19	36.624	Up-Regulated
FBLN1	1.80582	12.5371	10.635	8.61214e-21	6.28591e-19	36.6233	Up-Regulated
SPN	1.69075	7.73654	10.6313	8.82677e-21	6.41888e-19	36.599	Up-Regulated
DFNB39	1.90259	5.83228	10.6315	9.28933e-21	6.73051e-19	36.5505	Up-Regulated
LOC388462	1.57397	6.02993	10.6158	9.77187e-21	7.05429e-19	36.4988	Up-Regulated
LPAR1	1.31126	8.1282	10.6108	1.00974e-20	7.26276e-19	36.4666	Up-Regulated
NPL	1.13928	7.66627	10.6098	1.01646e-20	7.28464e-19	36.46	Up-Regulated
CTGF	1.62671	12.7751	10.6081	1.02825e-20	7.34252e-19	36.4487	Up-Regulated
FCGR2C	1.78152	6.24082	10.6167	1.07856e-20	7.67405e-19	36.4052	Up-Regulated
GIMAP8	1.34077	7.95715	10.5956	1.11587e-20	7.91105e-19	36.3682	Up-Regulated
LOC116399	1.31343	8.90249	10.5895	1.16158e-20	8.18911e-19	36.3286	Up-Regulated
THBS1	1.97671	13.2799	10.5893	1.16337e-20	8.18911e-19	36.3271	Up-Regulated
FLJ20001	1.47225	6.06502	10.5781	1.25232e-20	8.78399e-19	36.2545	Up-Regulated
LOC116144	1.09314	7.94591	10.5622	1.38969e-20	9.67892e-19	36.152	Up-Regulated
DOCK10	1.61943	8.32584	10.5608	1.40292e-20	9.73678e-19	36.1427	Up-Regulated
LY86	1.67282	7.23395	10.5414	1.59328e-20	1.09809e-18	36.0174	Up-Regulated
AOC3	1.49065	10.137	10.5395	1.61274e-20	1.10764e-18	36.0054	Up-Regulated
LOC144129	1.15876	9.64879	10.5379	1.63016e-20	1.11573e-18	35.9949	Up-Regulated
ABCA6	1.80758	6.91936	10.5328	1.68522e-20	1.14944e-18	35.9621	Up-Regulated
DPYSL3	1.30909	12.1485	10.5241	1.7844e-20	1.2129e-18	35.9058	Up-Regulated
FBLN5	1.42359	10.285	10.517	1.87045e-20	1.26704e-18	35.8595	Up-Regulated
OMD	2.3393	6.95832	10.5227	1.99542e-20	1.34249e-18	35.7994	Up-Regulated
HLA-DOA	1.69065	9.41095	10.5075	1.9901e-20	1.34249e-18	35.7984	Up-Regulated
SLFN11	1.17782	9.32049	10.5047	2.02765e-20	1.35956e-18	35.78	Up-Regulated
LOC102724841	1.2794	10.3146	10.4944	2.16881e-20	1.44929e-18	35.7137	Up-Regulated
ATP8B2	1.18161	9.74728	10.493	2.18903e-20	1.45788e-18	35.7046	Up-Regulated
LRP1	1.03785	13.586	10.4787	2.40357e-20	1.59539e-18	35.6125	Up-Regulated
LOC116110	1.16066	9.19554	10.4771	2.42881e-20	1.60675e-18	35.6022	Up-Regulated
THEMIS2	1.23213	9.32259	10.4694	2.55469e-20	1.68439e-18	35.5525	Up-Regulated
CD209	1.85767	6.36616	10.4631	2.66357e-20	1.74559e-18	35.5114	Up-Regulated
LUM	1.70314	14.1405	10.463	2.66516e-20	1.74559e-18	35.5108	Up-Regulated
PRICKLE1	1.44486	8.47951	10.4609	2.70154e-20	1.76345e-18	35.4974	Up-Regulated
FILIP1	1.54263	6.03631	10.4604	2.71026e-20	1.76345e-18	35.4942	Up-Regulated
JM2	1.88212	5.4266	10.4594	2.72867e-20	1.76961e-18	35.4876	Up-Regulated
GPR85	1.16251	4.88386	10.4584	2.74671e-20	1.77549e-18	35.4811	Up-Regulated
IL7R	2.57768	6.73372	10.452	3.01086e-20	1.9399e-18	35.3925	Up-Regulated
SIGLEC10	1.68466	7.6191	10.4298	3.31124e-20	2.11962e-18	35.297	Up-Regulated
FGL2	1.64837	9.11047	10.425	3.41833e-20	2.18111e-18	35.2657	Up-Regulated
FEZ1	1.11723	7.93667	10.4229	3.4648e-20	2.20366e-18	35.2524	Up-Regulated
LOC90262	2.02026	5.83012	10.4219	3.48682e-20	2.21056e-18	35.2461	Up-Regulated
TGFB3	1.66661	10.1527	10.4194	3.54501e-20	2.24027e-18	35.2298	Up-Regulated
LILRB3	1.55791	6.80435	10.4069	3.84844e-20	2.42427e-18	35.149	Up-Regulated
VSIG4	1.80337	9.03238	10.4004	4.01419e-20	2.52066e-18	35.1075	Up-Regulated
ITGAL	1.86742	8.23554	10.3968	4.11128e-20	2.57016e-18	35.0839	Up-Regulated
SGCD	1.675	8.08251	10.3925	4.22856e-20	2.62197e-18	35.0562	Up-Regulated
PRKCB	2.14048	7.16828	10.379	4.61966e-20	2.85552e-18	34.9691	Up-Regulated
KFM	1.86071	5.4342	10.3851	4.66169e-20	2.87253e-18	34.9621	Up-Regulated
HSPA12B	1.13316	7.50098	10.3714	4.85345e-20	2.98141e-18	34.9205	Up-Regulated
CHSY3	1.4842	6.5483	10.342	5.88415e-20	3.58118e-18	34.7309	Up-Regulated
ZNF518B	1.38462	7.29301	10.3338	6.20815e-20	3.76678e-18	34.6781	Up-Regulated
CXCR6	1.82469	6.08146	10.3311	6.31768e-20	3.82152e-18	34.6609	Up-Regulated
LOC732216	1.86995	6.05129	10.3257	6.54397e-20	3.94633e-18	34.6262	Up-Regulated
C1QB	1.54219	11.4352	10.325	6.57274e-20	3.95163e-18	34.6219	Up-Regulated
GFPT2	1.91364	9.20725	10.3172	6.91686e-20	4.14592e-18	34.5717	Up-Regulated
CYTIP	1.62759	8.08919	10.3163	6.95916e-20	4.15868e-18	34.5657	Up-Regulated
SLC31A2	1.01647	8.29096	10.315	7.01938e-20	4.17964e-18	34.5572	Up-Regulated
LPAR4	1.57345	2.21236	10.3405	7.22635e-20	4.27956e-18	34.5362	Up-Regulated
SHROOM4	1.05586	7.84757	10.3031	7.58765e-20	4.48011e-18	34.4805	Up-Regulated
TIGIT	2.2427	5.51343	10.2878	8.38201e-20	4.93441e-18	34.3825	Up-Regulated
PTGER3	1.85138	6.89022	10.2848	8.54599e-20	5.01601e-18	34.3634	Up-Regulated
COL14A1	1.87151	11.01	10.272	9.29193e-20	5.42167e-18	34.281	Up-Regulated
LOC220776	1.13506	10.8255	10.2708	9.36566e-20	5.44861e-18	34.2733	Up-Regulated
DPEP2	1.56208	6.24026	10.2698	9.42491e-20	5.467e-18	34.2671	Up-Regulated
LSP1	1.41669	10.2804	10.2594	1.00913e-19	5.83644e-18	34.1998	Up-Regulated
LOC112557	1.14495	10.4898	10.2491	1.07927e-19	6.22391e-18	34.1336	Up-Regulated
GPR183	1.80404	8.08579	10.2478	1.08809e-19	6.25652e-18	34.1256	Up-Regulated
CLMP	2.27206	6.88944	10.2448	1.1101e-19	6.36455e-18	34.1059	Up-Regulated
LAMA2	1.74625	10.0714	10.242	1.13017e-19	6.44228e-18	34.0883	Up-Regulated
CALCRL	1.41	9.00253	10.2397	1.14729e-19	6.52109e-18	34.0735	Up-Regulated
EBF2	2.27814	3.85189	10.2495	1.24103e-19	7.01359e-18	34.0019	Up-Regulated
RGS18	1.85499	5.01267	10.2258	1.31582e-19	7.41506e-18	33.9404	Up-Regulated
PIK3CG	1.8389	6.4329	10.2138	1.35787e-19	7.63028e-18	33.9075	Up-Regulated
MEDAG	2.2086	8.0803	10.2086	1.40497e-19	7.87259e-18	33.874	Up-Regulated
HCK	1.3647	8.64958	10.2075	1.4156e-19	7.90975e-18	33.8666	Up-Regulated
TNFAIP8L2	1.41813	6.32722	10.1973	1.51255e-19	8.4277e-18	33.8013	Up-Regulated
CLEC4A	1.39986	6.04181	10.1935	1.55011e-19	8.61271e-18	33.7772	Up-Regulated
NID1	1.13386	11.2675	10.1732	1.76947e-19	9.77659e-18	33.6469	Up-Regulated
CAR10	2.38627	9.11173	10.1686	1.82381e-19	1.00487e-17	33.6171	Up-Regulated
IL21R	1.83169	5.98651	10.1568	2.06121e-19	1.13252e-17	33.4986	Up-Regulated
MAP1L	1.1267	9.57919	10.1469	2.1001e-19	1.15069e-17	33.4782	Up-Regulated
KIAA0226L	1.59146	6.42017	10.1376	2.23138e-19	1.21925e-17	33.4185	Up-Regulated
ZNF62	1.05982	8.29938	10.124	2.43691e-19	1.32788e-17	33.3318	Up-Regulated
GPR141	1.83516	2.13118	10.1854	2.64127e-19	1.43135e-17	33.2723	Up-Regulated
HRH2	1.63599	3.98276	10.1121	2.63313e-19	1.43086e-17	33.2556	Up-Regulated
ZFHX4	1.70198	7.14587	10.1055	2.7485e-19	1.48539e-17	33.2134	Up-Regulated
PLA2G7	1.77869	7.13663	10.1047	2.76282e-19	1.48906e-17	33.2082	Up-Regulated
C14ORF37	1.32137	6.66822	10.1011	2.82748e-19	1.51977e-17	33.1855	Up-Regulated
ASPN	1.75484	10.5738	10.0967	2.90957e-19	1.55965e-17	33.1573	Up-Regulated
PDGFRB	1.18075	12.4732	10.0923	2.99479e-19	1.601e-17	33.1289	Up-Regulated
LOC51089	1.404	11.3997	10.0888	3.06407e-19	1.63362e-17	33.1064	Up-Regulated
SLIT2	2.13619	7.82593	10.0856	3.12722e-19	1.66281e-17	33.0863	Up-Regulated
STAB1	1.09603	10.4428	10.0797	3.25028e-19	1.7236e-17	33.0483	Up-Regulated
KCNE4	1.37292	9.12432	10.075	3.3508e-19	1.77216e-17	33.0183	Up-Regulated
LOC654127	1.23197	5.57368	10.0573	3.75913e-19	1.98282e-17	32.9051	Up-Regulated
DACT1	1.23309	8.97237	10.0544	3.83115e-19	2.01543e-17	32.8864	Up-Regulated
PLCL1	1.2655	6.08896	10.0467	4.0262e-19	2.11242e-17	32.8375	Up-Regulated
KLF12	1.02453	8.45176	10.0433	4.11757e-19	2.15465e-17	32.8155	Up-Regulated
FCGR2B	1.84521	7.63411	10.0389	4.4284e-19	2.3051e-17	32.7458	Up-Regulated
PARVG	1.48698	8.32741	10.031	4.45853e-19	2.31469e-17	32.7371	Up-Regulated
P2RX7	1.69993	5.27744	10.0136	5.21442e-19	2.70003e-17	32.585	Up-Regulated
LAX1	2.16313	4.74768	10.0045	5.29646e-19	2.73535e-17	32.5676	Up-Regulated
VASH2	1.28015	5.71565	9.99463	5.64457e-19	2.90754e-17	32.505	Up-Regulated
LRRC32	1.05207	11.2338	9.9941	5.66408e-19	2.91001e-17	32.5016	Up-Regulated
VMCM	1.3773	8.05018	9.979	6.24611e-19	3.19246e-17	32.4053	Up-Regulated
PYHIN1	2.2371	4.24567	9.98072	6.45166e-19	3.28902e-17	32.3754	Up-Regulated
HOXD8	1.0018	5.7028	9.96391	6.88741e-19	3.48422e-17	32.3091	Up-Regulated
ARHGAP20	1.50552	5.62936	9.95735	7.18647e-19	3.62624e-17	32.2672	Up-Regulated
ETS1	1.01576	11.5021	9.95634	7.23342e-19	3.64064e-17	32.2608	Up-Regulated
SIGLEC1	1.85764	8.06051	9.94497	7.78611e-19	3.90887e-17	32.1884	Up-Regulated
GBP5	1.99552	7.35147	9.93569	8.268e-19	4.14028e-17	32.1293	Up-Regulated
TENM3	1.58036	8.71167	9.93472	8.32014e-19	4.15587e-17	32.1231	Up-Regulated
COL15A1	1.37783	11.4003	9.934	8.35869e-19	4.16461e-17	32.1185	Up-Regulated
P2RY10	2.28883	4.25297	9.92554	8.82913e-19	4.37695e-17	32.0646	Up-Regulated
ROBO1	1.27506	9.25842	9.91962	9.17352e-19	4.53631e-17	32.027	Up-Regulated
FMO1	2.19354	6.42001	9.92708	9.52663e-19	4.69917e-17	31.9939	Up-Regulated
STX11	1.23711	6.7994	9.90111	1.034e-18	5.0877e-17	31.9092	Up-Regulated
HSPA12A	1.14024	7.58985	9.89863	1.05076e-18	5.15731e-17	31.8933	Up-Regulated
DYSF	1.02658	8.93167	9.89608	1.06817e-18	5.21689e-17	31.8772	Up-Regulated
SHE	1.30616	7.10422	9.89461	1.07838e-18	5.25379e-17	31.8678	Up-Regulated
LOC222113	2.15957	11.474	9.88996	1.1113e-18	5.40085e-17	31.8382	Up-Regulated
LMCD1	1.0417	10.0822	9.88838	1.1227e-18	5.44288e-17	31.8282	Up-Regulated
PCDH18	1.31262	8.39718	9.882	1.16994e-18	5.64424e-17	31.7876	Up-Regulated
LOC139770	1.49356	4.60187	9.8822	1.21883e-18	5.86581e-17	31.7493	Up-Regulated
ADORA3	1.4481	7.21943	9.87475	1.22605e-18	5.88625e-17	31.7415	Up-Regulated
MEOX2	1.53448	6.16371	9.88114	1.33685e-18	6.35757e-17	31.6625	Up-Regulated
CRTAM	1.78102	4.11177	9.86162	1.33459e-18	6.35757e-17	31.658	Up-Regulated
CSF3R	1.66717	7.88261	9.86133	1.33708e-18	6.35757e-17	31.6562	Up-Regulated
IL10	1.7015	3.14722	9.86586	1.35429e-18	6.42395e-17	31.6456	Up-Regulated
CD248	1.32764	10.7477	9.85678	1.37697e-18	6.51592e-17	31.6272	Up-Regulated
CYP1B1	1.98571	9.96725	9.84906	1.44729e-18	6.79987e-17	31.5782	Up-Regulated
TNFRSF8	1.51263	4.54296	9.84322	1.50288e-18	7.04431e-17	31.5411	Up-Regulated
ACSM5	1.75105	3.21644	9.8672	1.52651e-18	7.12696e-17	31.534	Up-Regulated
CPXM1	1.76559	9.45138	9.84068	1.52772e-18	7.12696e-17	31.525	Up-Regulated
LOC220083	1.52163	11.0778	9.83702	1.56422e-18	7.27019e-17	31.5018	Up-Regulated
PRF1	1.27337	7.02543	9.83687	1.56577e-18	7.27019e-17	31.5008	Up-Regulated
KCNQ5	1.69138	4.13551	9.83672	1.63395e-18	7.56899e-17	31.4609	Up-Regulated
VIM	1.03707	14.4783	9.82689	1.66986e-18	7.68341e-17	31.4374	Up-Regulated
GLI3	1.50066	7.84669	9.82685	1.67031e-18	7.68341e-17	31.4372	Up-Regulated
FGR	1.42324	8.11655	9.81579	1.79381e-18	8.2324e-17	31.367	Up-Regulated
CCDC102B	1.22335	6.5624	9.81483	1.80495e-18	8.26433e-17	31.3609	Up-Regulated
IL2RA	2.25005	6.28332	9.80919	1.87184e-18	8.53109e-17	31.3251	Up-Regulated
CD3G	2.06973	4.29833	9.82676	1.89522e-18	8.6178e-17	31.3191	Up-Regulated
MFAP4	1.66282	11.0862	9.80258	1.95328e-18	8.86145e-17	31.2832	Up-Regulated
JAM2	1.26548	7.2117	9.7931	2.07642e-18	9.39854e-17	31.223	Up-Regulated
CDH21	1.58448	6.01138	9.789	2.13201e-18	9.58437e-17	31.197	Up-Regulated
CD96	1.90124	6.56537	9.789	2.13201e-18	9.58437e-17	31.197	Up-Regulated
DOCK8	1.32298	9.2084	9.78559	2.17942e-18	9.77526e-17	31.1754	Up-Regulated
COL6A3	1.78045	14.442	9.77608	2.31713e-18	1.0346e-16	31.1151	Up-Regulated
FAM198A	1.63834	7.05126	9.76651	2.46437e-18	1.09787e-16	31.0544	Up-Regulated
FAT4	1.51333	8.01952	9.76103	2.55298e-18	1.13479e-16	31.0197	Up-Regulated
DAAM2	1.3987	8.41434	9.75098	2.72363e-18	1.20522e-16	30.956	Up-Regulated
FYB	1.66534	8.5386	9.75049	2.73211e-18	1.20628e-16	30.9529	Up-Regulated
HMOX1	1.10441	9.40442	9.7438	2.85245e-18	1.2566e-16	30.9105	Up-Regulated
CD300A	1.16327	8.13096	9.74315	2.86441e-18	1.25907e-16	30.9064	Up-Regulated
SLAMF1	1.94463	4.9559	9.74024	3.03905e-18	1.33287e-16	30.8503	Up-Regulated
CD38	2.18407	4.96059	9.73671	3.10873e-18	1.36041e-16	30.828	Up-Regulated
GAPT	2.02744	5.27593	9.72575	3.20369e-18	1.39887e-16	30.7963	Up-Regulated
LRRC8C	1.04814	8.61291	9.71633	3.40367e-18	1.48292e-16	30.7367	Up-Regulated
EVCL	1.36606	9.0788	9.71059	3.5316e-18	1.53191e-16	30.7004	Up-Regulated
Diff48	1.92941	6.67935	9.70801	3.59086e-18	1.55421e-16	30.684	Up-Regulated
RNF144A	1.16389	9.51044	9.69719	3.84932e-18	1.66244e-16	30.6156	Up-Regulated
CILP	2.78608	8.58826	9.68502	4.16256e-18	1.7938e-16	30.5386	Up-Regulated
CST7	1.53694	6.85166	9.67921	4.32068e-18	1.85789e-16	30.5019	Up-Regulated
TGD	1.11447	9.52297	9.67401	4.46747e-18	1.91393e-16	30.4691	Up-Regulated
SPI1	1.26928	8.95604	9.67391	4.47036e-18	1.91393e-16	30.4684	Up-Regulated
CNTNAP1	1.1502	8.05559	9.6627	4.80417e-18	2.04798e-16	30.3976	Up-Regulated
CCR4	2.32414	4.41985	9.70434	4.90088e-18	2.07579e-16	30.3929	Up-Regulated
ITK	2.13745	6.3905	9.66675	4.86957e-18	2.0714e-16	30.3864	Up-Regulated
GMFG	1.20368	8.47278	9.6388	5.60047e-18	2.36199e-16	30.2467	Up-Regulated
MPDZ	1.27724	8.47168	9.63027	5.91545e-18	2.48952e-16	30.1928	Up-Regulated
CD2	1.74537	7.58535	9.60075	7.14776e-18	2.9954e-16	30.0067	Up-Regulated
ABCC9	1.73309	8.12785	9.57674	8.336e-18	3.464e-16	29.8554	Up-Regulated
LOC105371892	1.34349	5.34907	9.57161	8.61439e-18	3.5647e-16	29.823	Up-Regulated
COL3A1	1.81068	16.3911	9.56856	8.78427e-18	3.62741e-16	29.8038	Up-Regulated
SSPN	1.22515	9.42656	9.5604	9.25538e-18	3.81399e-16	29.7524	Up-Regulated
KLRD1	1.62997	4.34132	9.55062	1.02361e-17	4.19191e-16	29.6555	Up-Regulated
LOC91672	1.06337	8.34112	9.54296	1.03477e-17	4.22886e-16	29.6427	Up-Regulated
ACSS3	1.43253	6.49887	9.54013	1.05368e-17	4.29726e-16	29.6249	Up-Regulated
KCNA3	1.86563	4.14262	9.5382	1.10804e-17	4.50967e-16	29.5775	Up-Regulated
PDE1B	1.17033	7.52773	9.53024	1.12246e-17	4.55897e-16	29.5627	Up-Regulated
PLOSL	1.25271	9.95319	9.52964	1.12675e-17	4.56702e-16	29.5589	Up-Regulated
LINC01140	1.38336	6.42407	9.5127	1.25561e-17	5.03772e-16	29.4524	Up-Regulated
TIMP3	1.30586	13.5311	9.49784	1.38062e-17	5.51691e-16	29.359	Up-Regulated
LILRA5	1.57446	5.55209	9.49573	1.39933e-17	5.58039e-16	29.3458	Up-Regulated
FCGR3A	1.61644	10.2495	9.49284	1.42548e-17	5.67214e-16	29.3276	Up-Regulated
TRAF3IP3	1.6604	6.73877	9.49255	1.42807e-17	5.67214e-16	29.3258	Up-Regulated
COL5A2	1.62589	13.0259	9.48229	1.52476e-17	6.04404e-16	29.2613	Up-Regulated
LRFN5	1.74635	4.07483	9.47705	1.63647e-17	6.47388e-16	29.1939	Up-Regulated
SH2D1A	2.10284	5.11111	9.48665	1.66044e-17	6.5556e-16	29.184	Up-Regulated
PIK3CD	1.16084	8.6385	9.46318	1.72257e-17	6.78732e-16	29.1413	Up-Regulated
DOK3	1.1791	7.58319	9.4617	1.73886e-17	6.83792e-16	29.1321	Up-Regulated
SIAT2	1.92048	6.25572	9.46574	1.75867e-17	6.90208e-16	29.1231	Up-Regulated
RSPO3	2.22147	6.09622	9.44924	1.88267e-17	7.35951e-16	29.0539	Up-Regulated
FAM101B	1.06638	8.76388	9.44741	1.90477e-17	7.43124e-16	29.0424	Up-Regulated
LILRA2	1.71793	5.48647	9.44046	1.99103e-17	7.75248e-16	28.9989	Up-Regulated
GPR171	1.94467	4.87307	9.44549	2.00072e-17	7.75966e-16	28.9963	Up-Regulated
LOC93149	1.52689	6.50029	9.43983	1.99908e-17	7.75966e-16	28.9949	Up-Regulated
ABCA9	1.71486	6.65531	9.43796	2.02309e-17	7.81577e-16	28.9832	Up-Regulated
GIMAP7	1.4744	7.5204	9.43653	2.04154e-17	7.87166e-16	28.9742	Up-Regulated
MEFV	1.81314	3.5707	9.44047	2.14374e-17	8.23125e-16	28.9305	Up-Regulated
PIK3R6	1.28057	5.50321	9.42924	2.1386e-17	8.22988e-16	28.9285	Up-Regulated
EVC2	1.29924	6.71232	9.42861	2.14728e-17	8.23125e-16	28.9246	Up-Regulated
MDGA1	1.25569	7.28841	9.42776	2.15888e-17	8.25971e-16	28.9193	Up-Regulated
LOC116203	1.28182	7.8917	9.42635	2.17846e-17	8.31852e-16	28.9104	Up-Regulated
SLC1A3	1.69793	8.05995	9.42406	2.21048e-17	8.42454e-16	28.896	Up-Regulated
TESPA1	1.92036	4.85899	9.42272	2.31251e-17	8.79644e-16	28.8538	Up-Regulated
PLEKHO1	1.0237	9.92171	9.40855	2.43988e-17	9.24537e-16	28.7989	Up-Regulated
LOC116141	1.22731	7.78747	9.40605	2.47913e-17	9.37615e-16	28.7832	Up-Regulated
CD37	1.67054	8.97759	9.40254	2.53504e-17	9.54879e-16	28.7613	Up-Regulated
CD200R1	1.73613	3.4779	9.40771	2.54409e-17	9.54879e-16	28.7599	Up-Regulated
BHLHE22	1.59814	5.66091	9.40209	2.54247e-17	9.54879e-16	28.7584	Up-Regulated
MFAP5	2.22814	9.25669	9.4072	2.55223e-17	9.5612e-16	28.7568	Up-Regulated
ITGA4L	1.54719	6.98375	9.39952	2.58436e-17	9.66326e-16	28.7423	Up-Regulated
PDLIM3	1.49836	9.98423	9.37712	2.98022e-17	1.11015e-15	28.6021	Up-Regulated
GNGT2	1.24907	4.72962	9.35851	3.35459e-17	1.24491e-15	28.4858	Up-Regulated
PRICKLE2	1.08554	9.09985	9.35815	3.36227e-17	1.24542e-15	28.4835	Up-Regulated
FLJ45829	1.72611	7.52467	9.35265	3.48193e-17	1.28607e-15	28.4491	Up-Regulated
KBTBD8	1.31248	5.5387	9.35251	3.485e-17	1.28607e-15	28.4483	Up-Regulated
KLHL4	1.90752	4.51991	9.35769	3.49521e-17	1.28743e-15	28.4476	Up-Regulated
LILRA1	1.723	2.69142	9.43264	3.60855e-17	1.31935e-15	28.4454	Up-Regulated
GIMAP5	1.33486	8.42623	9.35104	3.5177e-17	1.29331e-15	28.4391	Up-Regulated
MMP16	1.65765	5.29652	9.34949	3.55261e-17	1.30372e-15	28.4294	Up-Regulated
PLXNC1	1.90488	7.7486	9.34762	3.59506e-17	1.31686e-15	28.4177	Up-Regulated
P2RY13	1.72828	5.77492	9.34043	3.76315e-17	1.37334e-15	28.3727	Up-Regulated
BACH2	1.37889	6.81265	9.31919	4.30638e-17	1.56008e-15	28.2401	Up-Regulated
SYNE3	1.36337	5.05363	9.3135	4.46498e-17	1.61163e-15	28.2046	Up-Regulated
CCR8	1.98445	2.77347	9.35102	4.72594e-17	1.69653e-15	28.1667	Up-Regulated
EBF3	1.46888	5.91649	9.3046	4.72443e-17	1.69653e-15	28.149	Up-Regulated
P2RY14	1.76546	4.8064	9.30879	4.76569e-17	1.70771e-15	28.1427	Up-Regulated
PTPNS1	1.01747	10.4142	9.30086	4.83789e-17	1.73044e-15	28.1257	Up-Regulated
EFMR	1.60378	4.21304	9.29426	5.04462e-17	1.80113e-15	28.0845	Up-Regulated
LOXL3	1.11374	7.36955	9.2908	5.1567e-17	1.83783e-15	28.0629	Up-Regulated
CDH11	1.71084	10.9285	9.28183	5.45843e-17	1.94187e-15	28.007	Up-Regulated
CRISPLD1	1.51289	7.38882	9.2777	5.603e-17	1.98972e-15	27.9813	Up-Regulated
FLJ13373	1.85134	6.20904	9.27462	5.71348e-17	2.02169e-15	27.9621	Up-Regulated
AC006129.2	1.4906	4.34813	9.27185	5.81488e-17	2.05024e-15	27.9448	Up-Regulated
MAN1C1	1.23381	8.37408	9.26847	5.9406e-17	2.08712e-15	27.9237	Up-Regulated
EOMES	2.14547	3.89098	9.28348	6.22417e-17	2.18287e-15	27.8869	Up-Regulated
ITGAM	1.36612	8.8247	9.25981	6.27564e-17	2.19703e-15	27.8698	Up-Regulated
IRAG	1.24311	9.65116	9.25297	6.55348e-17	2.2862e-15	27.8272	Up-Regulated
LOX	1.60445	9.75795	9.24676	6.81642e-17	2.37375e-15	27.7885	Up-Regulated
GHR	1.4465	6.48853	9.23913	7.15372e-17	2.48247e-15	27.741	Up-Regulated
ARHGAP15	1.58026	6.40205	9.22768	7.69159e-17	2.65978e-15	27.6697	Up-Regulated
CYSLTR1	1.71858	4.64061	9.23179	7.75637e-17	2.67751e-15	27.6637	Up-Regulated
CPXM2	1.61317	9.42283	9.22222	7.96174e-17	2.74361e-15	27.6358	Up-Regulated
KIAA1462	1.00708	10.0534	9.21971	8.08947e-17	2.78278e-15	27.6201	Up-Regulated
CD300LB	1.57558	4.57499	9.21423	8.37462e-17	2.87088e-15	27.5861	Up-Regulated
CCDC8	1.24679	8.5958	9.21175	8.50713e-17	2.91126e-15	27.5706	Up-Regulated
ITPRIPL1	1.3425	4.07654	9.20643	9.10341e-17	3.09541e-15	27.5063	Up-Regulated
APBB1IP	1.54408	7.9113	9.20122	9.09263e-17	3.09541e-15	27.5052	Up-Regulated
ENPEP	1.12243	7.65876	9.20096	9.10782e-17	3.09541e-15	27.5035	Up-Regulated
CLEC4E	2.01287	5.24048	9.19706	9.33478e-17	3.1671e-15	27.4793	Up-Regulated
CRYBB1	1.59679	2.6846	9.21376	9.64778e-17	3.26769e-15	27.456	Up-Regulated
LAMA4	1.05326	11.0334	9.19114	9.69077e-17	3.27664e-15	27.4425	Up-Regulated
MS4A16	1.42836	5.45728	9.19489	9.79064e-17	3.30476e-15	27.4347	Up-Regulated
KCNAB2	1.10009	8.55466	9.18633	9.98979e-17	3.36624e-15	27.4127	Up-Regulated
MMP2	1.76297	13.4673	9.1845	1.01059e-16	3.39956e-15	27.4013	Up-Regulated
ESR1	1.48958	5.48921	9.17994	1.04016e-16	3.48719e-15	27.3729	Up-Regulated
TNFSF20	1.41157	6.06809	9.17266	1.08905e-16	3.64489e-15	27.3278	Up-Regulated
ZNF804A	1.52416	2.76152	9.18422	1.12162e-16	3.72868e-15	27.3056	Up-Regulated
VCAN	1.68919	13.0239	9.16835	1.11914e-16	3.72868e-15	27.301	Up-Regulated
S1PR1	1.19212	9.17819	9.16831	1.11943e-16	3.72868e-15	27.3007	Up-Regulated
FCRI	1.59167	6.43182	9.16809	1.12097e-16	3.72868e-15	27.2994	Up-Regulated
FCGR1B	1.34915	6.31772	9.16327	1.15562e-16	3.83526e-15	27.2694	Up-Regulated
ITGB2	1.39139	11.1733	9.16072	1.17432e-16	3.89081e-15	27.2537	Up-Regulated
ANKRD44	1.43854	6.02272	9.16	1.1797e-16	3.90207e-15	27.2492	Up-Regulated
ABCD2	1.87239	3.16881	9.1677	1.2023e-16	3.96359e-15	27.235	Up-Regulated
CD8A	1.71178	7.31425	9.15432	1.22279e-16	4.02443e-15	27.2139	Up-Regulated
CD3E	1.74958	7.89469	9.15231	1.23836e-16	4.0689e-15	27.2015	Up-Regulated
ALOX5AP	1.35097	9.54317	9.14912	1.26356e-16	4.1448e-15	27.1817	Up-Regulated
LOC392665	1.41562	7.62646	9.14828	1.27028e-16	4.15996e-15	27.1764	Up-Regulated
MPO	1.4448	2.64549	9.16508	1.30929e-16	4.27357e-15	27.1558	Up-Regulated
ADAMTS16	2.29311	5.57261	9.14354	1.30881e-16	4.27357e-15	27.1471	Up-Regulated
TMEM255A	1.85675	5.22052	9.1425	1.31743e-16	4.29305e-15	27.1406	Up-Regulated
ARHGAP9	1.41915	7.67844	9.13584	1.37399e-16	4.46263e-15	27.0993	Up-Regulated
FLJ10923	1.13041	12.3057	9.13554	1.37655e-16	4.46363e-15	27.0974	Up-Regulated
NHSL2	1.6325	4.80201	9.13404	1.38966e-16	4.49877e-15	27.0881	Up-Regulated
LOC101928757	1.81677	9.5138	9.13339	1.39531e-16	4.50969e-15	27.0841	Up-Regulated
LST1	1.35271	7.5083	9.12772	1.44609e-16	4.66618e-15	27.049	Up-Regulated
HVCN1	1.20671	7.35143	9.12162	1.5028e-16	4.83339e-15	27.0112	Up-Regulated
KIAA0230	1.24019	11.0077	9.12047	1.51377e-16	4.86079e-15	27.004	Up-Regulated
TNFAIP8L3	1.3154	6.40468	9.1171	1.5462e-16	4.95687e-15	26.9832	Up-Regulated
LZTS1	1.1915	8.79451	9.11639	1.55317e-16	4.97116e-15	26.9788	Up-Regulated
LAG1	1.47968	6.31934	9.11412	1.57554e-16	5.03461e-15	26.9647	Up-Regulated
COL8A1	2.14716	9.37867	9.10949	1.6222e-16	5.16702e-15	26.936	Up-Regulated
HVLP	1.40669	9.1116	9.10648	1.65328e-16	5.25753e-15	26.9174	Up-Regulated
PNCA1	1.05857	12.4794	9.10492	1.66961e-16	5.30094e-15	26.9077	Up-Regulated
FAP	1.69877	9.97843	9.09625	1.76331e-16	5.58052e-15	26.854	Up-Regulated
SIGLEC8	1.8722	5.18804	9.09955	1.78478e-16	5.63943e-15	26.8444	Up-Regulated
SLFN12L	1.5035	3.22512	9.09861	1.79531e-16	5.66368e-15	26.8386	Up-Regulated
CYTL1	1.51937	3.95691	9.0775	1.98419e-16	6.24956e-15	26.738	Up-Regulated
ADAMTS2	1.36537	9.49322	9.07403	2.02789e-16	6.37705e-15	26.7166	Up-Regulated
IGDCC4	1.51872	6.45718	9.07206	2.05323e-16	6.44651e-15	26.7044	Up-Regulated
ICOS	1.85279	4.34804	9.08449	2.16817e-16	6.79658e-15	26.66	Up-Regulated
C14orf141	1.22561	11.9354	9.06168	2.19169e-16	6.85944e-15	26.6402	Up-Regulated
MAP1LC3C	1.73537	2.27171	9.08823	2.5177e-16	7.8549e-15	26.5248	Up-Regulated
SCUBE2	1.64804	8.37923	9.04287	2.46688e-16	7.70851e-15	26.5239	Up-Regulated
GJD3	1.08275	6.63607	9.03458	2.59873e-16	8.0854e-15	26.4728	Up-Regulated
GPR176	1.22075	6.63739	9.03452	2.59975e-16	8.0854e-15	26.4724	Up-Regulated
EDNRA	1.39648	9.46324	9.03214	2.63886e-16	8.19414e-15	26.4577	Up-Regulated
HSD11B1	1.65911	7.31162	9.00715	3.08711e-16	9.5411e-15	26.3035	Up-Regulated
CD1D	1.34332	6.29204	8.99992	3.23035e-16	9.96822e-15	26.2589	Up-Regulated
HCG11	1.03222	7.975	8.99687	3.29284e-16	1.01317e-14	26.2401	Up-Regulated
MDC2	1.75889	6.05974	8.99683	3.29359e-16	1.01317e-14	26.2398	Up-Regulated
C6orf98	1.11874	10.1865	8.98731	3.49626e-16	1.07385e-14	26.1811	Up-Regulated
LOC732183	1.08963	9.44473	8.98103	3.63665e-16	1.11351e-14	26.1424	Up-Regulated
AMICA1	1.55357	8.30619	8.97905	3.68219e-16	1.12572e-14	26.1302	Up-Regulated
CSF1	1.03818	9.29135	8.96788	3.94906e-16	1.20358e-14	26.0614	Up-Regulated
ITGAX	1.31813	9.08654	8.96702	3.97044e-16	1.20824e-14	26.0561	Up-Regulated
LDB2	1.00744	8.45193	8.9519	4.3649e-16	1.3242e-14	25.963	Up-Regulated
ENOX1	1.29078	6.23342	8.94363	4.59669e-16	1.38601e-14	25.9122	Up-Regulated
COPZ2	1.18668	8.15993	8.9355	4.83674e-16	1.45617e-14	25.8622	Up-Regulated
AQP9	2.00773	6.60016	8.93245	4.92998e-16	1.48199e-14	25.8434	Up-Regulated
FMNL1	1.12763	9.4727	8.92202	5.26213e-16	1.57944e-14	25.7793	Up-Regulated
CD48	1.77835	7.74839	8.91264	5.58017e-16	1.67236e-14	25.7216	Up-Regulated
MGC4837	1.04467	7.38233	8.91037	5.65986e-16	1.69368e-14	25.7077	Up-Regulated
PPP1R16B	1.37259	7.96504	8.90574	5.82603e-16	1.74077e-14	25.6793	Up-Regulated
DNAJC5B	1.81013	4.19262	8.91232	5.94881e-16	1.7721e-14	25.6634	Up-Regulated
ACTA2	1.28508	13.4263	8.9013	5.98986e-16	1.78165e-14	25.652	Up-Regulated
EFS	1.05732	7.65445	8.90003	6.03755e-16	1.79313e-14	25.6442	Up-Regulated
HSS	1.06719	10.8986	8.89401	6.26909e-16	1.85911e-14	25.6072	Up-Regulated
COL1A2	1.6378	16.2545	8.89196	6.34972e-16	1.8802e-14	25.5947	Up-Regulated
LOC100507145	1.13688	8.62919	8.89033	6.41496e-16	1.89668e-14	25.5846	Up-Regulated
SUSD5	1.46913	6.05974	8.88778	6.5178e-16	1.92421e-14	25.569	Up-Regulated
CYBRD1	1.26906	11.6559	8.88664	6.5645e-16	1.93511e-14	25.562	Up-Regulated
EBF1	1.175	7.37914	8.88433	6.65973e-16	1.96026e-14	25.5478	Up-Regulated
ZFHX4-AS1	1.53564	2.00823	8.93577	7.40008e-16	2.1685e-14	25.4758	Up-Regulated
ITGA1	1.03843	10.3747	8.86372	7.57417e-16	2.21623e-14	25.4214	Up-Regulated
LOC100131600	1.85807	4.76032	8.85571	7.96188e-16	2.3228e-14	25.3723	Up-Regulated
SIGLEC17P	1.51534	3.88772	8.8531	8.34105e-16	2.42626e-14	25.3289	Up-Regulated
FIBIN	1.81411	8.32793	8.84346	8.59386e-16	2.49613e-14	25.2973	Up-Regulated
ANGPT1	1.46719	6.18993	8.84142	8.70416e-16	2.52446e-14	25.2847	Up-Regulated
RHOH	1.59666	6.82445	8.83915	8.82811e-16	2.55666e-14	25.2708	Up-Regulated
RASL12	1.01187	7.93691	8.83589	9.00938e-16	2.60154e-14	25.2509	Up-Regulated
MYCT1	1.06791	7.31167	8.83295	9.17597e-16	2.64578e-14	25.2329	Up-Regulated
TCP228	1.45009	9.00504	8.83051	9.31656e-16	2.68241e-14	25.2179	Up-Regulated
KMO	1.42709	5.18954	8.82433	9.68213e-16	2.78361e-14	25.1801	Up-Regulated
GYPE	1.25659	3.08721	8.82405	1.02998e-15	2.95689e-14	25.124	Up-Regulated
RASSF8	1.20409	8.68225	8.81018	1.05736e-15	3.03111e-14	25.0936	Up-Regulated
CXCR4	1.35791	10.87	8.8093	1.06322e-15	3.0435e-14	25.0881	Up-Regulated
RNF35	1.5495	2.35412	8.83098	1.08206e-15	3.08848e-14	25.0827	Up-Regulated
PPFIA2	1.71739	4.53917	8.81642	1.07987e-15	3.08667e-14	25.0776	Up-Regulated
SULF1	1.77685	12.7548	8.80521	1.09058e-15	3.10831e-14	25.0632	Up-Regulated
THEMIS	2.05242	4.24437	8.80894	1.09773e-15	3.12418e-14	25.0591	Up-Regulated
PYPAF7	1.57564	3.36124	8.80661	1.11378e-15	3.16531e-14	25.0448	Up-Regulated
LOC154397	2.04919	5.87139	8.78888	1.20723e-15	3.39673e-14	24.9633	Up-Regulated
CD14	1.05175	10.525	8.78219	1.25854e-15	3.53106e-14	24.9224	Up-Regulated
NCF4	1.19694	7.83448	8.77771	1.29408e-15	3.62563e-14	24.8951	Up-Regulated
CPED1	1.55879	8.05796	8.77545	1.31239e-15	3.66653e-14	24.8813	Up-Regulated
SORCS2	1.56017	7.60981	8.77297	1.33274e-15	3.71814e-14	24.8661	Up-Regulated
GZMK	2.06454	6.29097	8.76825	1.37239e-15	3.81798e-14	24.8373	Up-Regulated
LINC00341	1.20927	6.1884	8.7645	1.40479e-15	3.90263e-14	24.8144	Up-Regulated
CD69	1.81378	6.8275	8.74706	1.56549e-15	4.31873e-14	24.708	Up-Regulated
DKK2	1.53884	6.14313	8.7491	1.59145e-15	4.38425e-14	24.6942	Up-Regulated
AKT3	1.03816	9.33773	8.73853	1.65056e-15	4.53447e-14	24.656	Up-Regulated
CD247	1.47973	6.47425	8.73565	1.68036e-15	4.60992e-14	24.6384	Up-Regulated
LOC220695	1.45211	12.2331	8.73324	1.70564e-15	4.6728e-14	24.6238	Up-Regulated
LOC116403	1.67345	2.27867	8.7563	1.7682e-15	4.82414e-14	24.6028	Up-Regulated
CD300LF	1.5335	6.64089	8.71721	1.88396e-15	5.13289e-14	24.5261	Up-Regulated
ALDH1L2	1.48329	8.26217	8.71485	1.91174e-15	5.2014e-14	24.5117	Up-Regulated
LOC51159	1.65687	8.56737	8.70675	2.01014e-15	5.45412e-14	24.4624	Up-Regulated
LOC100421587	1.42774	7.132	8.70545	2.0854e-15	5.64285e-14	24.4286	Up-Regulated
NCF2	1.38514	8.97092	8.68619	2.28328e-15	6.15304e-14	24.3372	Up-Regulated
GPR68	1.3111	7.98763	8.67958	2.37853e-15	6.39231e-14	24.2971	Up-Regulated
HSPC046	1.09722	8.18074	8.67637	2.42638e-15	6.51205e-14	24.2775	Up-Regulated
PNOC	1.93777	4.12569	8.67549	2.58262e-15	6.91262e-14	24.221	Up-Regulated
IGER	1.7015	5.45594	8.66743	2.63782e-15	7.05081e-14	24.1978	Up-Regulated
LY9	1.97073	5.17161	8.65976	2.76577e-15	7.36298e-14	24.1513	Up-Regulated
PRKA2	1.30087	9.28336	8.656	2.91242e-15	7.73258e-14	24.1029	Up-Regulated
KRP	1.46747	11.0413	8.64484	2.94879e-15	7.81864e-14	24.086	Up-Regulated
GEM	1.28774	10.0821	8.64179	3.00494e-15	7.95685e-14	24.0675	Up-Regulated
BCL2A1	1.49508	6.80159	8.63628	3.10895e-15	8.22127e-14	24.034	Up-Regulated
F2R	1.11917	11.0371	8.63543	3.12541e-15	8.25376e-14	24.0288	Up-Regulated
LYVE1	1.69755	6.44421	8.63282	3.17603e-15	8.37625e-14	24.0131	Up-Regulated
LOC644410	1.39017	4.86619	8.6281	3.27016e-15	8.61302e-14	23.9844	Up-Regulated
ABCA8	2.07047	7.38662	8.62672	3.29803e-15	8.66334e-14	23.976	Up-Regulated
DPT	1.94762	8.61837	8.62543	3.32442e-15	8.72109e-14	23.9682	Up-Regulated
GIMAP1	1.11868	6.94028	8.62498	3.33378e-15	8.73406e-14	23.9655	Up-Regulated
TNFRSF9	1.69812	3.58617	8.63367	3.43828e-15	8.98403e-14	23.9423	Up-Regulated
FLJ33280	1.02716	8.30051	8.62002	3.43734e-15	8.98403e-14	23.9354	Up-Regulated
ADGRE2	1.08048	7.31525	8.60906	3.67799e-15	9.57246e-14	23.8689	Up-Regulated
GYPC	1.05897	9.1312	8.60768	3.70948e-15	9.64172e-14	23.8606	Up-Regulated
DCLK1	1.64307	7.10122	8.60192	3.84352e-15	9.977e-14	23.8257	Up-Regulated
CCDC36	1.23143	2.70208	8.60575	3.85915e-15	1.00045e-13	23.8241	Up-Regulated
CD80	1.63001	4.48806	8.59541	4.11273e-15	1.06201e-13	23.7616	Up-Regulated
GRAVIN	1.32795	10.9129	8.59002	4.13612e-15	1.06665e-13	23.7537	Up-Regulated
EML1	1.04298	8.27722	8.58359	4.30343e-15	1.10836e-13	23.7147	Up-Regulated
ELN	1.39456	11.427	8.58298	4.31966e-15	1.11013e-13	23.711	Up-Regulated
ALPK2	1.94875	6.22459	8.58291	4.32154e-15	1.11013e-13	23.7106	Up-Regulated
TMEM52B	1.60991	3.73964	8.58242	4.33471e-15	1.11207e-13	23.7076	Up-Regulated
CECR1	1.35901	9.98353	8.57756	4.46651e-15	1.14389e-13	23.6782	Up-Regulated
TCF21	1.35317	7.54188	8.57742	4.4703e-15	1.14389e-13	23.6773	Up-Regulated
CPA3	1.72381	8.25188	8.57715	4.47773e-15	1.14431e-13	23.6757	Up-Regulated
ADAM23	1.7437	5.74788	8.57438	4.55483e-15	1.16251e-13	23.6589	Up-Regulated
PABPC5	1.21651	4.45064	8.5769	4.60903e-15	1.17483e-13	23.6497	Up-Regulated
SCN2B	1.75386	4.63231	8.57636	4.62428e-15	1.1772e-13	23.6465	Up-Regulated
P4HA3	1.64009	7.22822	8.56706	4.76496e-15	1.2099e-13	23.6147	Up-Regulated
TNFAIP3	1.0677	10.1658	8.56433	4.84558e-15	1.22879e-13	23.5982	Up-Regulated
PRR16	1.09985	6.03907	8.56245	4.90197e-15	1.2415e-13	23.5868	Up-Regulated
PYGO1	1.64812	3.16841	8.5683	5.13549e-15	1.29757e-13	23.5483	Up-Regulated
GPC3	1.347	7.8283	8.54716	5.38569e-15	1.35879e-13	23.4944	Up-Regulated
LOC105373216	1.08415	6.42496	8.54159	5.57356e-15	1.40082e-13	23.4607	Up-Regulated
MN1	1.18371	8.62694	8.54011	5.62441e-15	1.41181e-13	23.4518	Up-Regulated
FASLG	1.59719	3.05377	8.53504	5.80285e-15	1.45292e-13	23.4211	Up-Regulated
CD83	1.19408	8.09643	8.52665	6.10968e-15	1.5278e-13	23.3705	Up-Regulated
GPR82	1.53718	2.9255	8.52793	6.22703e-15	1.55518e-13	23.3543	Up-Regulated
PDZRN3	1.07168	8.72536	8.51897	6.40534e-15	1.59401e-13	23.3241	Up-Regulated
PTPRD	1.27556	7.20915	8.51893	6.40668e-15	1.59401e-13	23.3239	Up-Regulated
LSAMP	1.31978	7.29887	8.51835	6.42973e-15	1.59774e-13	23.3204	Up-Regulated
SYNPO2	1.62386	9.46783	8.51352	6.62331e-15	1.64378e-13	23.2913	Up-Regulated
HHIPL1	1.16745	6.4858	8.5093	6.79727e-15	1.68484e-13	23.2658	Up-Regulated
SLC16A6	1.39395	4.6327	8.50415	7.01544e-15	1.73457e-13	23.2348	Up-Regulated
COL4A1	1.02311	13.7216	8.50135	7.13716e-15	1.76026e-13	23.2179	Up-Regulated
TNFSF4	1.33356	7.13443	8.49239	7.54107e-15	1.85525e-13	23.1638	Up-Regulated
MRGPRF	1.32023	7.91711	8.49074	7.61762e-15	1.86944e-13	23.1539	Up-Regulated
SEMA3D	1.96587	4.98954	8.4887	7.92064e-15	1.93659e-13	23.118	Up-Regulated
ZNF366	1.53851	4.59026	8.48243	8.01612e-15	1.95752e-13	23.1039	Up-Regulated
TRIL	1.03281	7.18368	8.48013	8.12995e-15	1.97799e-13	23.09	Up-Regulated
CD72	1.41306	6.95124	8.45985	9.20606e-15	2.22883e-13	22.968	Up-Regulated
KCNE1	1.71451	2.54326	8.47968	9.58653e-15	2.31666e-13	22.943	Up-Regulated
GUCY1A3	1.27361	9.81846	8.44524	1.00686e-14	2.42283e-13	22.88	Up-Regulated
IDDM12	1.68048	5.13125	8.44883	1.01099e-14	2.42982e-13	22.8784	Up-Regulated
CLEC1A	1.13982	5.924	8.4413	1.03143e-14	2.47594e-13	22.8564	Up-Regulated
GALNT15	1.47692	6.77296	8.44096	1.03353e-14	2.47796e-13	22.8544	Up-Regulated
GRAP2	1.42608	5.29033	8.43721	1.05757e-14	2.52948e-13	22.8318	Up-Regulated
OGN	2.30868	7.78677	8.44322	1.07408e-14	2.56585e-13	22.8214	Up-Regulated
ANOS1	1.45617	7.39702	8.42731	1.1236e-14	2.67768e-13	22.7723	Up-Regulated
GPR174	1.99709	2.58152	8.4484	1.19142e-14	2.8325e-13	22.7322	Up-Regulated
SMO	1.07332	8.67665	8.41714	1.1957e-14	2.83925e-13	22.7113	Up-Regulated
HS3ST2	1.82596	5.76794	8.41348	1.22283e-14	2.89671e-13	22.6893	Up-Regulated
NCF1	1.63643	6.7624	8.40755	1.26795e-14	3.00001e-13	22.6537	Up-Regulated
LAYN	1.02268	7.9099	8.40505	1.28749e-14	3.04261e-13	22.6387	Up-Regulated
FNDC1	1.97658	10.2879	8.40209	1.31099e-14	3.09075e-13	22.6209	Up-Regulated
TIL	1.08617	7.36502	8.39858	1.33941e-14	3.15399e-13	22.5999	Up-Regulated
TRIM22	1.15639	10.0568	8.39497	1.36928e-14	3.22049e-13	22.5782	Up-Regulated
LOC155236	1.79556	2.71758	8.40167	1.4583e-14	3.42173e-13	22.5261	Up-Regulated
CD27	1.73251	6.65293	8.37563	1.54087e-14	3.59415e-13	22.4623	Up-Regulated
MIR99AHG	1.36282	4.11223	8.37164	1.57887e-14	3.67411e-13	22.4384	Up-Regulated
FLJ12929	1.02775	8.02646	8.36843	1.61009e-14	3.73797e-13	22.4192	Up-Regulated
BCHE	1.65561	5.24427	8.36587	1.63545e-14	3.7924e-13	22.4038	Up-Regulated
MRC2	1.27798	11.6779	8.36479	1.64627e-14	3.80856e-13	22.3974	Up-Regulated
SIT1	2.0005	4.98333	8.36129	1.68179e-14	3.8862e-13	22.3764	Up-Regulated
DIO2	1.41043	8.78066	8.35956	1.69958e-14	3.92273e-13	22.3661	Up-Regulated
GREB1	1.38509	6.8185	8.35815	1.71428e-14	3.95204e-13	22.3576	Up-Regulated
LOC649616	1.25406	6.39682	8.35463	1.75145e-14	4.02366e-13	22.3366	Up-Regulated
NLGN4X	1.61765	6.03131	8.35351	1.76344e-14	4.04651e-13	22.3299	Up-Regulated
TSPAN18	1.10923	8.58073	8.34761	1.82806e-14	4.18507e-13	22.2945	Up-Regulated
PLA2G5	1.46589	5.13684	8.34303	1.87971e-14	4.29834e-13	22.2672	Up-Regulated
EGR2	1.43259	8.59612	8.33792	1.93918e-14	4.42922e-13	22.2366	Up-Regulated
DJ964F7.1	1.45055	7.19303	8.34117	1.94936e-14	4.44463e-13	22.2339	Up-Regulated
LOC101928789	1.58444	6.45549	8.335	1.97403e-14	4.48808e-13	22.2191	Up-Regulated
FAM13C	1.531	6.19163	8.33556	2.01706e-14	4.57016e-13	22.2004	Up-Regulated
SLC24A4	1.54606	2.85955	8.33544	2.07012e-14	4.66899e-13	22.1774	Up-Regulated
PCED1B-AS1	1.63737	4.38848	8.32771	2.0636e-14	4.66492e-13	22.1756	Up-Regulated
LOC57123	1.47934	5.2528	8.32113	2.148e-14	4.83911e-13	22.1362	Up-Regulated
LEF1	1.18959	8.6908	8.31768	2.19351e-14	4.9334e-13	22.1157	Up-Regulated
CD74	1.02553	15.3941	8.31758	2.19484e-14	4.9334e-13	22.1151	Up-Regulated
RASAL3	1.27695	7.56244	8.31307	2.25591e-14	5.05917e-13	22.0881	Up-Regulated
PDE6G	1.55842	3.70122	8.29873	2.46154e-14	5.50784e-13	22.0025	Up-Regulated
LRCH2	1.21285	6.04906	8.29082	2.5828e-14	5.75962e-13	21.9553	Up-Regulated
LMOD1	1.32801	9.51448	8.28496	2.67632e-14	5.96144e-13	21.9204	Up-Regulated
LOC130935	1.64368	4.93386	8.28193	2.72606e-14	6.0654e-13	21.9023	Up-Regulated
FLJ37576	1.56199	9.07164	8.28166	2.73059e-14	6.06867e-13	21.9007	Up-Regulated
FMO2	1.79119	7.2596	8.28146	2.73383e-14	6.06905e-13	21.8995	Up-Regulated
DACT3	1.09799	7.62467	8.27504	2.84255e-14	6.29626e-13	21.8613	Up-Regulated
SFMBT2	1.41624	5.57973	8.27454	2.92171e-14	6.44993e-13	21.8368	Up-Regulated
GSE	1.66755	10.5092	8.27082	2.91628e-14	6.44515e-13	21.8361	Up-Regulated
METTL24	1.48014	3.58522	8.27268	3.02859e-14	6.67099e-13	21.8039	Up-Regulated
LOC100133525	1.1881	5.87785	8.26887	3.02395e-14	6.6682e-13	21.803	Up-Regulated
SLA2	1.30265	5.51539	8.2599	3.11616e-14	6.84863e-13	21.7711	Up-Regulated
SCA29	1.07381	8.9583	8.25793	3.15372e-14	6.92347e-13	21.7593	Up-Regulated
LGI2	1.28926	6.93922	8.25732	3.16538e-14	6.94137e-13	21.7557	Up-Regulated
CLEC10A	1.98763	6.23167	8.25151	3.27887e-14	7.16947e-13	21.7211	Up-Regulated
S1PR3	1.13437	8.99007	8.25144	3.28027e-14	7.16947e-13	21.7207	Up-Regulated
RNASE2	1.53179	4.4754	8.25067	3.29566e-14	7.19516e-13	21.7161	Up-Regulated
NCF1B	1.6734	4.75453	8.25276	3.3339e-14	7.27062e-13	21.7073	Up-Regulated
GBP1	1.15552	9.48874	8.23785	3.56202e-14	7.734e-13	21.6399	Up-Regulated
CHRDL1	2.43875	7.73617	8.23551	3.7008e-14	8.02652e-13	21.6048	Up-Regulated
ADAMTS4	1.20332	9.84809	8.22962	3.74411e-14	8.11155e-13	21.5909	Up-Regulated
PTPN7	1.35349	7.46209	8.22691	3.80604e-14	8.23671e-13	21.5748	Up-Regulated
HSPC062	2.00832	3.70883	8.22961	4.02657e-14	8.68545e-13	21.527	Up-Regulated
LOC4687	1.77741	5.05351	8.21871	4.09669e-14	8.82708e-13	21.5051	Up-Regulated
SFRP2	2.2214	13.2535	8.21426	4.10927e-14	8.84454e-13	21.4996	Up-Regulated
CYYR1	1.01856	8.33327	8.21404	4.11457e-14	8.84633e-13	21.4984	Up-Regulated
ZNF469	1.32808	8.75687	8.21057	4.2019e-14	9.01583e-13	21.4777	Up-Regulated
THBS2	1.65754	13.0626	8.2067	4.30146e-14	9.20811e-13	21.4548	Up-Regulated
LOC220567	1.00201	8.55803	8.2061	4.31729e-14	9.23199e-13	21.4512	Up-Regulated
LOC116243	2.1344	4.44527	8.20974	4.65122e-14	9.90325e-13	21.3881	Up-Regulated
TAGLN	1.28285	13.6766	8.18753	4.8303e-14	1.02528e-12	21.341	Up-Regulated
CORO1A	1.27454	9.96309	8.18751	4.83094e-14	1.02528e-12	21.3409	Up-Regulated
SMOC2	1.41649	10.3218	8.18713	4.84196e-14	1.02652e-12	21.3386	Up-Regulated
LOC115619	1.37818	4.19622	8.18368	4.94407e-14	1.04704e-12	21.3182	Up-Regulated
LOC82154	1.20417	7.02069	8.18226	4.98678e-14	1.05496e-12	21.3097	Up-Regulated
RFPL1S	1.23622	3.23045	8.18544	5.00854e-14	1.0573e-12	21.3079	Up-Regulated
MAP4K1	1.67222	6.7586	8.17957	5.06832e-14	1.06878e-12	21.2938	Up-Regulated
ZFP82	1.10555	5.70791	8.1745	5.22607e-14	1.0997e-12	21.2637	Up-Regulated
FAM126A	1.0264	8.62815	8.17007	5.3676e-14	1.1235e-12	21.2375	Up-Regulated
LOC145786	1.23537	4.66995	8.16966	5.381e-14	1.12512e-12	21.2351	Up-Regulated
ADGRE1	1.52171	3.56144	8.17648	5.54477e-14	1.15691e-12	21.2131	Up-Regulated
HAS2	1.69806	6.72525	8.16576	5.50926e-14	1.15072e-12	21.212	Up-Regulated
ARHGEF15	1.02678	7.85651	8.16149	5.65323e-14	1.17706e-12	21.1867	Up-Regulated
CDK15	1.4126	1.48428	8.27141	6.33102e-14	1.30854e-12	21.1511	Up-Regulated
PCOLCE	1.14189	11.1357	8.15064	6.03564e-14	1.25142e-12	21.1224	Up-Regulated
CYR61	1.50676	11.9056	8.14703	6.16852e-14	1.27763e-12	21.1011	Up-Regulated
CIITA	1.38098	8.58963	8.13792	6.51692e-14	1.34416e-12	21.0472	Up-Regulated
EDNRB	1.19204	8.20801	8.13478	6.64146e-14	1.36842e-12	21.0286	Up-Regulated
P2RY8	1.36299	7.2909	8.13412	6.66821e-14	1.3725e-12	21.0247	Up-Regulated
PLN	1.80731	6.771	8.13271	6.72489e-14	1.38129e-12	21.0164	Up-Regulated
DKFZP586M121	1.22629	11.6555	8.13101	6.79431e-14	1.3941e-12	21.0063	Up-Regulated
TLL1	1.64262	5.54837	8.1293	6.86463e-14	1.40707e-12	20.9962	Up-Regulated
NEFH	1.45527	5.54827	8.12836	6.90359e-14	1.41359e-12	20.9906	Up-Regulated
MDFIC	1.05076	9.63971	8.12453	7.06471e-14	1.44509e-12	20.968	Up-Regulated
LOC348416	1.68723	7.8698	8.12325	7.1195e-14	1.45479e-12	20.9604	Up-Regulated
IFI30	1.09374	11.9232	8.11846	7.328e-14	1.49585e-12	20.9321	Up-Regulated
PREX2	1.77616	5.185	8.11562	7.45411e-14	1.52002e-12	20.9154	Up-Regulated
KIAA0922	1.10137	8.36459	8.11511	7.47732e-14	1.52319e-12	20.9123	Up-Regulated
CD5	1.6346	6.82353	8.11169	7.63268e-14	1.55164e-12	20.8921	Up-Regulated
DMGDH	1.33083	4.04621	8.1091	7.75272e-14	1.57442e-12	20.8768	Up-Regulated
C20orf17	1.30585	7.58413	8.10759	7.82342e-14	1.58715e-12	20.8679	Up-Regulated
INMT	1.11314	8.89979	8.10739	7.83305e-14	1.58748e-12	20.8667	Up-Regulated
LNHR	1.70465	8.02029	8.10352	8.01772e-14	1.62158e-12	20.8439	Up-Regulated
KIAA0960	1.39165	6.10589	8.10285	8.04999e-14	1.62644e-12	20.8399	Up-Regulated
LTA	1.69486	3.13403	8.09686	8.34555e-14	1.68101e-12	20.8045	Up-Regulated
LOC100129963	1.50328	1.80884	8.14075	8.81302e-14	1.76976e-12	20.7849	Up-Regulated
TBLYM	1.52026	3.89859	8.08486	8.96981e-14	1.79942e-12	20.7338	Up-Regulated
KERA	1.36422	3.45677	8.11814	9.56848e-14	1.9137e-12	20.6988	Up-Regulated
BGN	1.06972	14.3908	8.06802	9.92525e-14	1.97905e-12	20.6345	Up-Regulated
SCARA3	1.15217	9.31389	8.06744	9.95949e-14	1.98188e-12	20.6311	Up-Regulated
FLVCR2	1.16232	7.13128	8.06304	1.02268e-13	2.03302e-12	20.6052	Up-Regulated
WT1AS	1.55333	2.94737	8.09593	1.06426e-13	2.10721e-12	20.5921	Up-Regulated
PRDM6	1.09604	5.42365	8.05966	1.04358e-13	2.06834e-12	20.5853	Up-Regulated
IGFBP5	1.41968	14.1964	8.05554	1.06973e-13	2.11593e-12	20.561	Up-Regulated
PRKG1	1.60557	6.19253	8.05423	1.07821e-13	2.12843e-12	20.5533	Up-Regulated
KIAA1755	1.14396	7.80816	8.04986	1.10685e-13	2.18279e-12	20.5276	Up-Regulated
KLRG1	1.31651	4.34007	8.0422	1.15887e-13	2.28084e-12	20.4825	Up-Regulated
ADAMTS12	2.03385	7.78897	8.04109	1.16663e-13	2.29383e-12	20.476	Up-Regulated
NEGR1	1.25557	7.92218	8.03561	1.20562e-13	2.36814e-12	20.4438	Up-Regulated
TMEM200A	1.20915	8.50552	8.03315	1.2235e-13	2.40089e-12	20.4293	Up-Regulated
CD3D	1.65498	6.49253	8.02705	1.26905e-13	2.4878e-12	20.3935	Up-Regulated
THPO	1.21539	2.9028	8.02514	1.37268e-13	2.68563e-12	20.324	Up-Regulated
AS1	1.24748	3.67967	8.01574	1.4196e-13	2.77468e-12	20.2885	Up-Regulated
POU2F2	1.31047	6.08779	8	1.49226e-13	2.90235e-12	20.2346	Up-Regulated
SUSD3	1.30063	5.74411	7.99394	1.54734e-13	3.00651e-12	20.199	Up-Regulated
HTRA4	1.72726	3.29109	7.97842	1.81324e-13	3.49912e-12	20.0511	Up-Regulated
GLI1	1.3439	7.44459	7.96865	1.79986e-13	3.47669e-12	20.0508	Up-Regulated
C1QTNF2	1.12531	5.40042	7.96406	1.84998e-13	3.56306e-12	20.0239	Up-Regulated
LRRC55	1.71186	5.3081	7.95556	2.03223e-13	3.89511e-12	19.9368	Up-Regulated
TNFAIP6	1.60697	7.1618	7.95195	2.03189e-13	3.89511e-12	19.9344	Up-Regulated
LOC115321	1.3975	5.14129	7.94539	2.06807e-13	3.95996e-12	19.9146	Up-Regulated
NLRC3	1.09062	6.79906	7.94339	2.09281e-13	4.00331e-12	19.9029	Up-Regulated
DFNB12	1.1651	6.52063	7.94324	2.09476e-13	4.00331e-12	19.902	Up-Regulated
SRPX2	1.39287	9.02932	7.93548	2.19392e-13	4.18473e-12	19.8567	Up-Regulated
KCND2	1.51183	6.44652	7.93416	2.21124e-13	4.20965e-12	19.849	Up-Regulated
MGC23947	1.13063	6.12205	7.93021	2.26388e-13	4.30573e-12	19.8259	Up-Regulated
AR	1.80179	4.34201	7.92606	2.42198e-13	4.59317e-12	19.7648	Up-Regulated
PRELP	1.38143	11.185	7.90942	2.56251e-13	4.85039e-12	19.7044	Up-Regulated
LOC115149	1.15546	11.4182	7.90669	2.60437e-13	4.92489e-12	19.6885	Up-Regulated
ZNF677	1.18298	4.61115	7.89516	2.78939e-13	5.23971e-12	19.6212	Up-Regulated
LOC121626	1.13686	6.80513	7.89187	2.84458e-13	5.33832e-12	19.602	Up-Regulated
IL12RB1	1.27906	5.86942	7.88235	3.01018e-13	5.63305e-12	19.5466	Up-Regulated
CHL1	1.78282	6.6028	7.88474	3.03053e-13	5.66577e-12	19.5425	Up-Regulated
CLEC12A	1.73337	4.74608	7.87873	3.20728e-13	5.97364e-12	19.4895	Up-Regulated
ZIK1	1.15069	5.4059	7.87004	3.2387e-13	6.01516e-12	19.4748	Up-Regulated
UNC5C	1.4334	4.06327	7.87825	3.28562e-13	6.09087e-12	19.4684	Up-Regulated
CXCR2	1.88536	4.17036	7.88088	3.30504e-13	6.11449e-12	19.4652	Up-Regulated
LOC132331	1.17576	2.36734	7.87255	3.39816e-13	6.26427e-12	19.4354	Up-Regulated
PLXNA4	1.49688	6.42817	7.86297	3.37742e-13	6.23184e-12	19.4337	Up-Regulated
PRKD1	1.09247	7.70724	7.85695	3.50048e-13	6.44088e-12	19.3986	Up-Regulated
C18orf3	1.46048	4.13176	7.85585	3.52325e-13	6.47676e-12	19.3923	Up-Regulated
CD52	1.47381	8.75954	7.85181	3.60885e-13	6.62795e-12	19.3688	Up-Regulated
LTBP1	1.16391	11.3875	7.85135	3.61877e-13	6.64001e-12	19.3661	Up-Regulated
IKZF3	1.8736	4.2119	7.86032	3.65302e-13	6.69664e-12	19.3645	Up-Regulated
MSC	1.01405	8.41884	7.8447	3.76428e-13	6.89067e-12	19.3274	Up-Regulated
SLC17A7	1.2611	4.35685	7.83536	4.061e-13	7.4239e-12	19.2556	Up-Regulated
KCNN3	1.20845	4.80538	7.82048	4.34531e-13	7.89983e-12	19.1867	Up-Regulated
LEPR	1.12673	8.22532	7.81529	4.48099e-13	8.12411e-12	19.1566	Up-Regulated
DFNA10	1.54275	3.98231	7.82675	4.54858e-13	8.22404e-12	19.1522	Up-Regulated
LOC105376701	1.02886	8.37464	7.81306	4.54046e-13	8.21686e-12	19.1437	Up-Regulated
TREM2	1.33519	8.29034	7.80797	4.67953e-13	8.45308e-12	19.1141	Up-Regulated
RUNX1T1	1.38471	5.65001	7.79559	5.13774e-13	9.20511e-12	19.0251	Up-Regulated
ROR2	1.23447	8.5727	7.79012	5.20049e-13	9.30912e-12	19.0107	Up-Regulated
HCST	1.09068	7.0775	7.78976	5.21183e-13	9.32098e-12	19.0085	Up-Regulated
LQT4	1.56269	7.99658	7.78762	5.27818e-13	9.42259e-12	18.9961	Up-Regulated
TDO2	1.7703	6.019	7.78215	5.56172e-13	9.86644e-12	18.9474	Up-Regulated
FAM20A	1.207	7.8471	7.7758	5.65977e-13	1.00314e-11	18.9277	Up-Regulated
CNTN4	1.29567	6.90684	7.77188	5.79229e-13	1.02387e-11	18.905	Up-Regulated
IL9R	1.28468	2.69909	7.78234	5.90664e-13	1.04315e-11	18.8962	Up-Regulated
FCN1	2.22712	6.08991	7.76392	6.07116e-13	1.07125e-11	18.859	Up-Regulated
FAM124A	1.04307	4.77245	7.76294	6.10656e-13	1.07654e-11	18.8533	Up-Regulated
PCDHGB6	1.28031	5.60909	7.75899	6.25051e-13	1.10094e-11	18.8304	Up-Regulated
OI4	1.59089	16.8144	7.7585	6.26839e-13	1.1031e-11	18.8276	Up-Regulated
AEBP1	1.30813	13.794	7.75774	6.2969e-13	1.10714e-11	18.8232	Up-Regulated
C6orf95	1.38365	3.69002	7.75665	6.33717e-13	1.11322e-11	18.817	Up-Regulated
ANGPTL2	1.10793	10.4042	7.75195	6.5157e-13	1.14357e-11	18.7897	Up-Regulated
B4GALNT1	1.08799	6.03333	7.75065	6.56566e-13	1.15132e-11	18.7822	Up-Regulated
ISLR	1.28559	12.1565	7.74866	6.6431e-13	1.16106e-11	18.7708	Up-Regulated
CLSTN2	1.30257	6.43814	7.74862	6.64467e-13	1.16106e-11	18.7705	Up-Regulated
SLC47A1	1.42019	5.12523	7.74119	6.94213e-13	1.20983e-11	18.7276	Up-Regulated
SLAMF6	1.6515	6.82108	7.73877	7.04188e-13	1.2229e-11	18.7136	Up-Regulated
GJA5	1.0242	8.0807	7.73641	7.14079e-13	1.23899e-11	18.7	Up-Regulated
HLA-DRB6	1.39796	8.7446	7.73467	7.5049e-13	1.29988e-11	18.6563	Up-Regulated
MCTP1	1.27055	7.11575	7.72598	7.59333e-13	1.31405e-11	18.6398	Up-Regulated
LOC100505836	1.70215	4.32518	7.7243	7.66854e-13	1.32591e-11	18.6301	Up-Regulated
ADGRD1	1.33429	7.5371	7.71931	7.89758e-13	1.36432e-11	18.6013	Up-Regulated
ISM1	1.73099	8.14385	7.71685	8.01271e-13	1.38059e-11	18.5871	Up-Regulated
CILP2	1.84091	7.43649	7.70836	8.42297e-13	1.44624e-11	18.5382	Up-Regulated
LOC154745	1.59685	6.84428	7.70788	8.4469e-13	1.44909e-11	18.5354	Up-Regulated
COL8A2	1.5214	9.5197	7.70019	8.83757e-13	1.51479e-11	18.4911	Up-Regulated
LRRC17	1.24451	7.25337	7.69671	9.02016e-13	1.54475e-11	18.471	Up-Regulated
FLJ21551	1.56029	9.08808	7.69581	9.06827e-13	1.55165e-11	18.4658	Up-Regulated
LOC135059	1.06692	7.40606	7.69082	9.33804e-13	1.5923e-11	18.4371	Up-Regulated
ADAMTS1	1.28474	10.2688	7.68791	9.49898e-13	1.61835e-11	18.4204	Up-Regulated
STAP1	2.15773	3.31357	7.69223	1.00153e-12	1.70191e-11	18.3788	Up-Regulated
PTGIS	1.74936	10.1187	7.68029	9.93409e-13	1.68956e-11	18.3765	Up-Regulated
CTSG	2.2208	4.23616	7.69082	1.0513e-12	1.78009e-11	18.3368	Up-Regulated
KLRB1	1.61291	5.89045	7.67324	1.03538e-12	1.75642e-11	18.336	Up-Regulated
CCL18	2.13693	8.32695	7.67379	1.05204e-12	1.78009e-11	18.3229	Up-Regulated
CCR7	1.96321	6.51673	7.67272	1.05866e-12	1.78976e-11	18.3167	Up-Regulated
KLRK1	1.4746	5.68267	7.668	1.06775e-12	1.8036e-11	18.3058	Up-Regulated
PSTPIP1	1.29581	6.49252	7.66131	1.1105e-12	1.86942e-11	18.2673	Up-Regulated
INHBA	1.84961	8.56552	7.64356	1.23227e-12	2.06737e-11	18.1654	Up-Regulated
DOK6	1.20467	6.03124	7.6433	1.23412e-12	2.06872e-11	18.164	Up-Regulated
NPR1	1.0819	7.6883	7.63028	1.33196e-12	2.22331e-11	18.0892	Up-Regulated
RUNX3	1.27956	8.15376	7.62671	1.36011e-12	2.26838e-11	18.0687	Up-Regulated
MGP	1.27982	12.7104	7.61834	1.42838e-12	2.37622e-11	18.0208	Up-Regulated
FAM124B	1.11419	5.08242	7.61241	1.47877e-12	2.44976e-11	17.9868	Up-Regulated
COL5A1	1.40852	13.6486	7.61154	1.48627e-12	2.46012e-11	17.9819	Up-Regulated
ITGA5	1.02026	11.7911	7.60939	1.50511e-12	2.48714e-11	17.9695	Up-Regulated
TLR6	1.16875	5.0785	7.60839	1.51391e-12	2.49959e-11	17.9638	Up-Regulated
COL12A1L	1.57703	12.5042	7.60512	1.54316e-12	2.54576e-11	17.9451	Up-Regulated
SCN4B	1.17961	7.43903	7.60396	1.55367e-12	2.56097e-11	17.9384	Up-Regulated
AVPR1A	1.60302	4.43115	7.60205	1.63089e-12	2.68155e-11	17.8961	Up-Regulated
CTHRC1	1.49295	10.9311	7.58841	1.70144e-12	2.78597e-11	17.8494	Up-Regulated
DCSTAMP	1.56136	4.13037	7.58099	1.80976e-12	2.95112e-11	17.7916	Up-Regulated
AOC4P	1.05995	1.53304	7.60631	1.8611e-12	3.02486e-11	17.7886	Up-Regulated
RNF175	1.23557	3.18931	7.58023	1.81781e-12	2.9618e-11	17.7872	Up-Regulated
GPM6B	1.26652	6.16176	7.57655	1.82338e-12	2.96843e-11	17.7817	Up-Regulated
FCRL5	2.25569	5.29598	7.58616	1.85786e-12	3.02207e-11	17.7738	Up-Regulated
NAPSB	1.64799	7.83279	7.56637	1.93492e-12	3.13968e-11	17.7235	Up-Regulated
PID1	1.03056	7.74315	7.56311	1.97209e-12	3.19476e-11	17.7049	Up-Regulated
HSPB6	1.33356	9.80133	7.54363	2.20913e-12	3.55545e-11	17.5937	Up-Regulated
C8ORF48	1.16076	3.81608	7.53894	2.27027e-12	3.64792e-11	17.567	Up-Regulated
GPC6	1.16864	8.93688	7.53233	2.35929e-12	3.78175e-11	17.5293	Up-Regulated
FAM26F	1.25069	6.18948	7.52202	2.50504e-12	4.00563e-11	17.4707	Up-Regulated
SCN7A	2.26801	6.16655	7.52571	2.54198e-12	4.05814e-11	17.4614	Up-Regulated
HLA-DPB2	1.5751	3.11711	7.52937	2.68095e-12	4.26965e-11	17.4201	Up-Regulated
MBNL1-AS1	1.03426	5.90856	7.50982	2.6891e-12	4.2792e-11	17.4012	Up-Regulated
CD6	1.24851	7.43363	7.50732	2.72841e-12	4.33477e-11	17.387	Up-Regulated
KIT	1.20747	8.15158	7.50653	2.74101e-12	4.3513e-11	17.3825	Up-Regulated
ITGBL1	1.46006	10.243	7.50464	2.77137e-12	4.38893e-11	17.3717	Up-Regulated
EX33	1.35909	4.45071	7.49993	2.84815e-12	4.5033e-11	17.345	Up-Regulated
BTLA	1.91259	3.87032	7.48957	3.13419e-12	4.94766e-11	17.2565	Up-Regulated
APLNR	1.26519	9.44215	7.48162	3.16743e-12	4.99616e-11	17.241	Up-Regulated
ID4	1.05454	7.78321	7.47795	3.23547e-12	5.09536e-11	17.2201	Up-Regulated
LIN7A	1.15612	3.51804	7.47461	3.29883e-12	5.18688e-11	17.2012	Up-Regulated
ACAP1	1.42902	7.28131	7.47253	3.33876e-12	5.24549e-11	17.1894	Up-Regulated
SPOCK1	1.43533	9.531	7.47198	3.34939e-12	5.25801e-11	17.1863	Up-Regulated
ITM2A	1.31341	8.20416	7.45745	3.6436e-12	5.69414e-11	17.1039	Up-Regulated
AGTR1B	1.41692	5.41657	7.45741	3.64448e-12	5.69414e-11	17.1036	Up-Regulated
FAT3	1.34614	4.54767	7.46193	3.67721e-12	5.73621e-11	17.1001	Up-Regulated
FGF10	1.80421	1.96066	7.52084	3.90763e-12	6.05744e-11	17.0998	Up-Regulated
CLDN11	1.316	7.81069	7.45654	3.6629e-12	5.7184e-11	17.0987	Up-Regulated
TRPM2	1.07031	7.60331	7.45322	3.73392e-12	5.82008e-11	17.0799	Up-Regulated
MYL9	1.06153	12.7791	7.45298	3.73908e-12	5.82355e-11	17.0785	Up-Regulated
XIRP1	2.03194	5.4914	7.44692	3.87253e-12	6.01246e-11	17.0442	Up-Regulated
TLR2	1.03753	8.68407	7.44589	3.89571e-12	6.04369e-11	17.0384	Up-Regulated
SEMA5A	1.01999	9.33143	7.44158	3.99406e-12	6.18173e-11	17.014	Up-Regulated
LRRC4C	1.24282	5.21341	7.44054	4.08825e-12	6.30777e-11	16.9937	Up-Regulated
LOC643737	1.13571	8.58056	7.43795	4.0788e-12	6.2981e-11	16.9934	Up-Regulated
C19ORF35	1.30112	3.61038	7.4366	4.11071e-12	6.33748e-11	16.9858	Up-Regulated
DFNA5	1.00999	7.97225	7.42525	4.38934e-12	6.74077e-11	16.9216	Up-Regulated
RGS1	1.29498	10.2742	7.42346	4.43507e-12	6.80044e-11	16.9115	Up-Regulated
TLR10	1.89514	4.43331	7.42368	4.50614e-12	6.90318e-11	16.8984	Up-Regulated
GZMA	1.28812	6.6326	7.4206	4.50905e-12	6.90318e-11	16.8953	Up-Regulated
APOL4	1.34	7.71752	7.41538	4.64683e-12	7.09763e-11	16.8658	Up-Regulated
SULT1C	1.28117	5.1691	7.41512	4.65385e-12	7.10287e-11	16.8643	Up-Regulated
SSC5D	1.15512	9.35546	7.41327	4.70389e-12	7.1737e-11	16.8539	Up-Regulated
CCDC170	1.08439	5.99582	7.41252	4.72429e-12	7.19927e-11	16.8496	Up-Regulated
OLR1	1.97459	8.58603	7.40978	4.79965e-12	7.30285e-11	16.8341	Up-Regulated
CORIN	1.55573	6.89487	7.40706	4.8755e-12	7.39734e-11	16.8188	Up-Regulated
FCGR3B	2.28848	4.944	7.40678	4.96747e-12	7.52924e-11	16.8031	Up-Regulated
RORB	1.38909	2.72976	7.40896	4.99079e-12	7.5588e-11	16.8011	Up-Regulated
ANGPTL1	1.77884	6.76345	7.39893	5.10968e-12	7.72931e-11	16.7729	Up-Regulated
NUGGC	1.77582	3.35657	7.40255	5.17811e-12	7.82453e-11	16.7651	Up-Regulated
SLC8A1	1.15396	7.87468	7.38996	5.38077e-12	8.11835e-11	16.7223	Up-Regulated
PAPPA	1.31727	7.64965	7.3842	5.5624e-12	8.386e-11	16.6898	Up-Regulated
LOC105376417	1.12541	6.42234	7.38222	5.62635e-12	8.46306e-11	16.6786	Up-Regulated
EPB41L3	1.07843	9.1486	7.37871	5.74137e-12	8.62792e-11	16.6588	Up-Regulated
FHL1	1.15002	9.64932	7.37568	5.84215e-12	8.75437e-11	16.6418	Up-Regulated
HK3	1.53975	6.82077	7.3741	5.89571e-12	8.82126e-11	16.6329	Up-Regulated
WISP2	1.77845	5.85411	7.36897	6.17512e-12	9.20452e-11	16.5901	Up-Regulated
HLA-DQA2	1.63939	8.27947	7.36436	6.23562e-12	9.28071e-11	16.578	Up-Regulated
LOC100290671	1.15491	7.90788	7.36185	6.32646e-12	9.3947e-11	16.5638	Up-Regulated
NKG7	1.22457	6.4201	7.36152	6.33839e-12	9.40536e-11	16.562	Up-Regulated
ZCCHC5	1.44072	1.34107	7.42386	6.87759e-12	1.01295e-10	16.547	Up-Regulated
STAT4	1.22937	6.26928	7.35659	6.52064e-12	9.65406e-11	16.5343	Up-Regulated
CCDC69	1.14909	9.05851	7.35361	6.63333e-12	9.81355e-11	16.5175	Up-Regulated
FCMR	1.61597	7.48163	7.349	6.81133e-12	1.00543e-10	16.4916	Up-Regulated
COL6A2	1.07481	13.8566	7.3452	6.96199e-12	1.02461e-10	16.4702	Up-Regulated
GNAL	1.05563	5.86706	7.33654	7.31681e-12	1.07444e-10	16.4215	Up-Regulated
LRRN4CL	1.39099	6.31083	7.32907	7.63774e-12	1.11742e-10	16.3795	Up-Regulated
ADAMTS5	1.01215	7.15539	7.32877	7.65084e-12	1.1185e-10	16.3779	Up-Regulated
SAMD3	1.38326	5.0633	7.3283	7.67146e-12	1.11966e-10	16.3752	Up-Regulated
DSEL	1.10463	7.95342	7.326	7.77356e-12	1.13143e-10	16.3623	Up-Regulated
PRPH2	1.08374	5.21451	7.32097	8.00086e-12	1.1628e-10	16.3341	Up-Regulated
THBS4	1.7035	10.5557	7.31552	8.25492e-12	1.19884e-10	16.3035	Up-Regulated
C1QTNF7	1.23799	6.44163	7.31302	8.37445e-12	1.21353e-10	16.2895	Up-Regulated
GREMLIN	2.14326	11.2265	7.31075	8.48392e-12	1.22759e-10	16.2768	Up-Regulated
CLECL1	1.49743	3.07929	7.31872	8.66274e-12	1.25072e-10	16.267	Up-Regulated
LOC96488	1.84773	3.71596	7.30251	9.34377e-12	1.34317e-10	16.1902	Up-Regulated
CD1C	1.84189	6.00231	7.29454	9.61813e-12	1.3816e-10	16.1592	Up-Regulated
COL6A1	1.07098	13.2353	7.28669	9.73763e-12	1.39775e-10	16.1419	Up-Regulated
LOC100131857	1.06709	14.3496	7.28516	9.82329e-12	1.40903e-10	16.1334	Up-Regulated
SLITRK4	1.56971	4.47595	7.28252	1.01346e-11	1.45158e-10	16.1054	Up-Regulated
PDZRN4	1.78625	3.88514	7.28072	1.05801e-11	1.5121e-10	16.0687	Up-Regulated
KCNK2	1.65975	5.01022	7.27552	1.05485e-11	1.50867e-10	16.0663	Up-Regulated
PDE3A	1.60585	6.98904	7.26775	1.08517e-11	1.54644e-10	16.036	Up-Regulated
TMEM200C	1.1106	3.9849	7.26736	1.08756e-11	1.54874e-10	16.0338	Up-Regulated
ZNF660	1.00717	3.2683	7.2714	1.09757e-11	1.56186e-10	16.0301	Up-Regulated
REM1	1.01111	4.70271	7.2631	1.11437e-11	1.58463e-10	16.01	Up-Regulated
IL18RAP	1.2998	4.22105	7.25799	1.14738e-11	1.62689e-10	15.9814	Up-Regulated
BMS1P20	1.85739	13.0227	7.25068	1.19628e-11	1.69381e-10	15.9406	Up-Regulated
CXCL9	1.90968	8.12489	7.24971	1.20293e-11	1.702e-10	15.9352	Up-Regulated
DLG2	1.41487	5.64527	7.24183	1.27839e-11	1.79337e-10	15.8783	Up-Regulated
C19ORF38	1.00585	4.84347	7.23885	1.27988e-11	1.79419e-10	15.8746	Up-Regulated
TMEM100	1.28951	6.20042	7.23375	1.31758e-11	1.84443e-10	15.8462	Up-Regulated
LOC100509003	1.4936	5.52198	7.23322	1.32158e-11	1.84871e-10	15.8432	Up-Regulated
SCARA5	2.63231	5.15128	7.23429	1.44736e-11	2.01186e-10	15.7702	Up-Regulated
COL24A1	1.51276	4.81082	7.21976	1.44955e-11	2.01349e-10	15.7554	Up-Regulated
NAALAD2	1.01958	4.40022	7.20855	1.52101e-11	2.11127e-10	15.7057	Up-Regulated
EMCN	1.1718	7.65748	7.2043	1.55823e-11	2.1599e-10	15.6821	Up-Regulated
LOC145757	1.42821	9.87524	7.19729	1.62169e-11	2.24471e-10	15.6431	Up-Regulated
LOC131511	1.11387	8.21233	7.19534	1.63971e-11	2.26807e-10	15.6323	Up-Regulated
HLA-DRB1	1.23884	12.36	7.19421	1.6503e-11	2.28113e-10	15.626	Up-Regulated
LOC144997	1.11492	8.20165	7.18198	1.76905e-11	2.43336e-10	15.558	Up-Regulated
USP51	1.24578	4.34025	7.17612	1.829e-11	2.51234e-10	15.5254	Up-Regulated
ZNF831	1.80089	4.94224	7.16608	1.96604e-11	2.68565e-10	15.4574	Up-Regulated
IL33	1.38364	8.01894	7.15791	2.02811e-11	2.76853e-10	15.4244	Up-Regulated
PDPN	1.55557	9.52692	7.14495	2.1827e-11	2.96844e-10	15.3526	Up-Regulated
MIR503HG	1.15405	3.969	7.14433	2.19027e-11	2.97551e-10	15.3492	Up-Regulated
MYOZ3	1.14297	5.16094	7.14092	2.23302e-11	3.02736e-10	15.3303	Up-Regulated
FRMD6	1.15858	10.0246	7.13151	2.35519e-11	3.18208e-10	15.2782	Up-Regulated
EPHA3	1.37962	8.68092	7.12631	2.42557e-11	3.27269e-10	15.2495	Up-Regulated
CCL11	1.49627	5.48128	7.12239	2.5558e-11	3.43669e-10	15.2036	Up-Regulated
ACP5	1.07178	10.1768	7.11418	2.59781e-11	3.48608e-10	15.1824	Up-Regulated
RGL4	1.26498	3.50798	7.11442	2.63331e-11	3.53131e-10	15.1718	Up-Regulated
CD101	1.05494	5.50038	7.11148	2.63778e-11	3.53491e-10	15.1675	Up-Regulated
FN1	1.51955	15.7768	7.10161	2.78902e-11	3.73001e-10	15.113	Up-Regulated
C7	1.90174	11.8516	7.09857	2.83729e-11	3.78457e-10	15.0962	Up-Regulated
NAP1L3	1.09736	6.81956	7.09445	2.9041e-11	3.86562e-10	15.0735	Up-Regulated
MAB21L1	1.29247	2.36409	7.09165	3.08531e-11	4.09855e-10	15.0222	Up-Regulated
CD36	1.56246	8.45075	7.07726	3.19971e-11	4.24197e-10	14.9787	Up-Regulated
PURG	1.02611	3.01632	7.07626	3.2654e-11	4.32038e-10	14.9615	Up-Regulated
SLC37A2	1.22876	7.90637	7.06716	3.38719e-11	4.46956e-10	14.9231	Up-Regulated
CD40LG	1.64053	3.90537	7.069	3.45215e-11	4.5492e-10	14.9098	Up-Regulated
RASGRP2	1.56355	6.93207	7.0639	3.44998e-11	4.5492e-10	14.9051	Up-Regulated
ADRB2	1.2729	5.15407	7.06248	3.47771e-11	4.57679e-10	14.8973	Up-Regulated
ZNF354C	1.29289	4.51241	7.06316	3.5152e-11	4.61997e-10	14.8894	Up-Regulated
C2	1.10327	9.59873	7.05743	3.57802e-11	4.6963e-10	14.8695	Up-Regulated
FCRL6	1.45268	3.22646	7.06041	3.6229e-11	4.75205e-10	14.8626	Up-Regulated
PDE7B	1.06487	6.34379	7.05142	3.70096e-11	4.8416e-10	14.8365	Up-Regulated
TCTEX1D1	1.16193	3.54357	7.0394	3.95995e-11	5.17357e-10	14.7704	Up-Regulated
ENPP6	1.32987	3.11763	7.04427	4.02525e-11	5.23812e-10	14.7624	Up-Regulated
P2RY12	1.62228	3.62591	7.03882	4.14998e-11	5.38626e-10	14.7326	Up-Regulated
ERVFRD-1	1.27548	1.51631	7.04671	4.21778e-11	5.4635e-10	14.7279	Up-Regulated
LOC148456	1.23354	7.34716	7.02767	4.2296e-11	5.47522e-10	14.706	Up-Regulated
NR4A3	1.63333	7.61005	7.01886	4.44409e-11	5.73038e-10	14.6577	Up-Regulated
FHL5	1.30098	5.9287	7.01632	4.50793e-11	5.80136e-10	14.6437	Up-Regulated
PRG4	1.57437	7.13863	7.01444	4.5557e-11	5.85141e-10	14.6334	Up-Regulated
LOC89959	1.44805	1.54384	7.04159	4.93236e-11	6.30247e-10	14.5971	Up-Regulated
FGD2	1.05366	7.76726	7.00494	4.80496e-11	6.16356e-10	14.5814	Up-Regulated
CFP	1.39216	5.73568	7.00184	4.88918e-11	6.25942e-10	14.5644	Up-Regulated
LOC100128727	1.12699	2.70954	7.00169	5.03456e-11	6.42475e-10	14.5411	Up-Regulated
LOC400760	1.30303	3.09015	7.00362	5.05308e-11	6.44423e-10	14.5402	Up-Regulated
TMEM71	1.17788	5.6165	6.98942	5.24164e-11	6.67608e-10	14.4964	Up-Regulated
FREM1	1.74483	6.60897	6.9876	5.37026e-11	6.83111e-10	14.4754	Up-Regulated
C5orf10	1.0176	5.82858	6.97694	5.62078e-11	7.13601e-10	14.4282	Up-Regulated
JCHAIN	2.33771	10.6326	6.97676	5.62642e-11	7.1365e-10	14.4272	Up-Regulated
TMEM35	1.21383	4.48101	6.95874	6.30982e-11	7.95464e-10	14.3179	Up-Regulated
CCBE1	1.30092	3.0993	6.95684	6.46697e-11	8.1372e-10	14.2965	Up-Regulated
GP5	1.34187	2.32041	6.9681	6.62772e-11	8.3183e-10	14.2894	Up-Regulated
SPATC1	1.29636	2.05942	6.96342	6.60286e-11	8.29489e-10	14.2873	Up-Regulated
CEACAM4	1.64495	3.69183	6.9495	6.6434e-11	8.33061e-10	14.2676	Up-Regulated
FLJ22814	1.90505	6.66668	6.94617	6.67532e-11	8.36212e-10	14.2602	Up-Regulated
NOX4	1.4766	7.44854	6.94554	6.69894e-11	8.38639e-10	14.2568	Up-Regulated
RSPO1	1.73423	3.56207	6.95468	6.83091e-11	8.51799e-10	14.2513	Up-Regulated
PLIN2	1.02058	10.011	6.94333	6.78205e-11	8.47435e-10	14.2447	Up-Regulated
CACNA2D1	1.83601	5.39922	6.94515	6.80672e-11	8.49445e-10	14.2438	Up-Regulated
TENM4	1.20823	8.27061	6.93632	7.05244e-11	8.77893e-10	14.2066	Up-Regulated
HDC	1.52644	4.91535	6.92799	7.38769e-11	9.16166e-10	14.1612	Up-Regulated
GFRA1	1.581	7.41588	6.92474	7.52278e-11	9.30585e-10	14.1435	Up-Regulated
TECTA	1.06835	3.16342	6.92598	7.57367e-11	9.36295e-10	14.1396	Up-Regulated
FGD3	1.05205	8.02279	6.91628	7.886e-11	9.73082e-10	14.0975	Up-Regulated
SLEB2	1.43734	4.95502	6.90976	8.17737e-11	1.0059e-09	14.062	Up-Regulated
FCRL3	2.15038	3.92528	6.91168	8.79367e-11	1.07635e-09	14.0075	Up-Regulated
BICC1	1.56315	8.15492	6.89716	8.89001e-11	1.08747e-09	13.9831	Up-Regulated
LPPR4	1.1741	6.50298	6.89446	8.90357e-11	1.08846e-09	13.9789	Up-Regulated
FAM129A	1.11188	9.59325	6.89263	8.99457e-11	1.0989e-09	13.969	Up-Regulated
SLC2A5	1.26414	6.76917	6.88834	9.21177e-11	1.12267e-09	13.9457	Up-Regulated
MYL3	1.24778	1.80126	6.90879	1.00639e-10	1.21976e-09	13.8998	Up-Regulated
LPL	1.26739	8.20013	6.8793	9.68616e-11	1.17686e-09	13.8967	Up-Regulated
TUB	1.05994	7.02939	6.86373	1.05599e-10	1.27518e-09	13.8123	Up-Regulated
PARP15	1.5997	4.74001	6.86295	1.0606e-10	1.27996e-09	13.8081	Up-Regulated
CD300E	1.68971	1.70202	6.92579	1.16035e-10	1.39101e-09	13.8046	Up-Regulated
TSKS	1.20032	2.16466	6.87201	1.11005e-10	1.33476e-09	13.783	Up-Regulated
GZMH	1.4705	4.91128	6.84529	1.16962e-10	1.40128e-09	13.7126	Up-Regulated
APBA2	1.0709	7.31298	6.84093	1.19819e-10	1.43291e-09	13.689	Up-Regulated
ABCB5	1.49004	2.42322	6.85842	1.26693e-10	1.50963e-09	13.6658	Up-Regulated
SIGLEC14	1.58053	5.57632	6.84798	1.36113e-10	1.6141e-09	13.5973	Up-Regulated
LINC00426	1.34196	3.45209	6.82436	1.33037e-10	1.58141e-09	13.5895	Up-Regulated
PAPLN	1.07577	8.85357	6.81906	1.35227e-10	1.60551e-09	13.5709	Up-Regulated
HTR2A	1.54348	2.26688	6.83295	1.41498e-10	1.67005e-09	13.5519	Up-Regulated
CD244	1.17028	4.00304	6.81265	1.40099e-10	1.65839e-09	13.5364	Up-Regulated
ZAP70	1.45158	6.47736	6.81084	1.41507e-10	1.67005e-09	13.5266	Up-Regulated
HOPX	1.01255	9.93994	6.79357	1.55651e-10	1.82717e-09	13.4336	Up-Regulated
SDPR	1.10432	8.31587	6.79293	1.56202e-10	1.83255e-09	13.4302	Up-Regulated
CPZ	1.1203	9.17378	6.79106	1.57822e-10	1.85045e-09	13.4201	Up-Regulated
FAM159A	1.21983	3.76316	6.79651	1.59212e-10	1.86565e-09	13.4197	Up-Regulated
PAMR1	1.03626	7.86494	6.77872	1.68926e-10	1.97363e-09	13.3537	Up-Regulated
MIR155HG	1.04448	4.31421	6.77714	1.70404e-10	1.98972e-09	13.3452	Up-Regulated
ADAMDEC1	1.71698	5.59443	6.77755	1.7441e-10	2.0353e-09	13.3279	Up-Regulated
ITGA8	1.68933	4.67602	6.77617	1.78028e-10	2.07141e-09	13.3107	Up-Regulated
CAMK1G	1.02267	4.30573	6.77013	1.7711e-10	2.06315e-09	13.3076	Up-Regulated
NXPH3	1.09041	6.31381	6.7695	1.77726e-10	2.06911e-09	13.3042	Up-Regulated
NTM	1.23703	9.24458	6.76359	1.83599e-10	2.13093e-09	13.2725	Up-Regulated
PTPN22	1.25607	6.7922	6.76358	1.8361e-10	2.13093e-09	13.2724	Up-Regulated
SERPINE1	1.32977	12.3486	6.76355	1.83644e-10	2.13093e-09	13.2722	Up-Regulated
SCRG1	1.64843	5.22509	6.76497	1.86886e-10	2.16428e-09	13.2605	Up-Regulated
ADAM6	2.18663	14.4013	6.75602	1.91399e-10	2.21396e-09	13.2319	Up-Regulated
COL21A1	1.44349	5.50105	6.74877	1.99184e-10	2.29329e-09	13.193	Up-Regulated
PCBP3-OT1	1.08185	6.21968	6.7458	2.02455e-10	2.32959e-09	13.1771	Up-Regulated
CLEC-6	1.45581	1.69865	6.77276	2.20438e-10	2.5233e-09	13.1446	Up-Regulated
EBI3	1.28706	5.24549	6.73381	2.16241e-10	2.47812e-09	13.1128	Up-Regulated
RGS22	1.40173	3.21992	6.73015	2.29066e-10	2.6145e-09	13.0647	Up-Regulated
FUT7	1.20107	3.57357	6.72467	2.27351e-10	2.59642e-09	13.0639	Up-Regulated
ZDHHC15	1.07299	5.2669	6.72037	2.3278e-10	2.65077e-09	13.0409	Up-Regulated
RNF150	1.23446	5.29542	6.7218	2.33828e-10	2.66117e-09	13.0392	Up-Regulated
SESN3	1.00542	6.5656	6.71882	2.34761e-10	2.67026e-09	13.0326	Up-Regulated
LOC101060681	1.27367	9.46144	6.71696	2.37161e-10	2.69445e-09	13.0227	Up-Regulated
NME8	1.21923	1.49644	6.73684	2.4899e-10	2.82398e-09	13.0098	Up-Regulated
CCR6	1.20047	6.5308	6.71094	2.45117e-10	2.78165e-09	12.9905	Up-Regulated
LOC102724263	1.15144	3.5833	6.71162	2.50312e-10	2.83735e-09	12.9754	Up-Regulated
CNN1	1.42671	9.48206	6.70649	2.51168e-10	2.84542e-09	12.9667	Up-Regulated
LILRA4	1.75757	3.51189	6.72393	2.59762e-10	2.93942e-09	12.9623	Up-Regulated
DTHD1	1.63353	2.18337	6.72958	2.66334e-10	3.00518e-09	12.9492	Up-Regulated
MAN9	1.05494	10.3463	6.67944	2.91209e-10	3.26352e-09	12.8224	Up-Regulated
CD274	1.02491	4.57672	6.67506	3.0188e-10	3.37736e-09	12.79	Up-Regulated
LOC100134052	1.36858	4.56513	6.66982	3.06909e-10	3.42201e-09	12.7712	Up-Regulated
HUMRTVLH3	1.13741	4.98371	6.66341	3.21679e-10	3.57863e-09	12.728	Up-Regulated
CH25H	1.14326	6.76563	6.66062	3.22704e-10	3.58622e-09	12.7223	Up-Regulated
CYP19A1	1.49571	3.30177	6.6595	3.32583e-10	3.69371e-09	12.6983	Up-Regulated
PKNOX2	1.1949	5.97738	6.65468	3.33335e-10	3.69998e-09	12.6906	Up-Regulated
ADAM19	1.20477	9.66855	6.65066	3.40723e-10	3.77774e-09	12.6693	Up-Regulated
BVES	1.10292	5.79799	6.64786	3.45953e-10	3.83358e-09	12.6544	Up-Regulated
CCL3	1.23256	6.15828	6.64734	3.4693e-10	3.84226e-09	12.6517	Up-Regulated
PTX3	1.87742	5.89261	6.62654	3.93114e-10	4.32469e-09	12.5325	Up-Regulated
SLC16A10	1.13389	6.05699	6.62095	4.00522e-10	4.39884e-09	12.5116	Up-Regulated
SFRP1	1.889	8.11697	6.61969	4.03267e-10	4.42653e-09	12.5049	Up-Regulated
GLI2	1.11294	7.88627	6.61373	4.16537e-10	4.56967e-09	12.4734	Up-Regulated
SLITRK3	1.48188	3.84894	6.61971	4.22884e-10	4.63159e-09	12.4694	Up-Regulated
RANBP3L	1.48966	1.90726	6.64094	4.66451e-10	5.07503e-09	12.4223	Up-Regulated
AMPH	1.25545	6.32514	6.58612	4.83855e-10	5.25282e-09	12.3273	Up-Regulated
LOC90719	1.05658	6.79929	6.58294	4.9227e-10	5.33832e-09	12.3105	Up-Regulated
TMC8	1.09217	8.52641	6.57682	5.08841e-10	5.50293e-09	12.2782	Up-Regulated
NTNG1	1.58534	3.60453	6.57867	5.21623e-10	5.63501e-09	12.2622	Up-Regulated
MZB1	1.91606	7.02197	6.57131	5.24262e-10	5.66042e-09	12.2491	Up-Regulated
CCL2	1.33106	9.16136	6.57018	5.27472e-10	5.69198e-09	12.2432	Up-Regulated
ADAMTSL3	1.41409	6.98687	6.56825	5.33009e-10	5.74859e-09	12.233	Up-Regulated
OTOA	1.20022	3.84235	6.56781	5.34271e-10	5.75907e-09	12.2307	Up-Regulated
TRIM58	1.15823	3.22158	6.5639	5.64882e-10	6.07909e-09	12.1846	Up-Regulated
HSCDIEL	1.76317	4.83911	6.55806	5.6966e-10	6.12385e-09	12.1708	Up-Regulated
FAM180B	1.71487	1.52569	6.5941	6.15306e-10	6.5646e-09	12.1558	Up-Regulated
GNG2	1.09549	8.85966	6.55221	5.81296e-10	6.22862e-09	12.1484	Up-Regulated
LOC100131093	1.28392	7.71705	6.54919	5.9087e-10	6.32435e-09	12.1325	Up-Regulated
LAMA1	1.32051	5.7439	6.54733	5.96822e-10	6.38461e-09	12.1227	Up-Regulated
RSAD2	1.17284	8.4871	6.5423	6.13282e-10	6.55006e-09	12.0962	Up-Regulated
GFRA2	1.28607	4.43931	6.53665	6.32255e-10	6.7309e-09	12.0665	Up-Regulated
MYL4	1.24947	2.49657	6.54074	6.39897e-10	6.80765e-09	12.063	Up-Regulated
PCDHGA9	1.2636	5.58282	6.53643	6.40154e-10	6.80765e-09	12.0571	Up-Regulated
PRSS35	1.15721	4.0403	6.52995	6.5552e-10	6.95984e-09	12.0313	Up-Regulated
CD79A	2.25443	6.98181	6.52545	6.71642e-10	7.12209e-09	12.0076	Up-Regulated
LOC100272216	1.1356	3.32323	6.5288	6.90268e-10	7.29743e-09	11.992	Up-Regulated
LRRN2	1.04873	7.27157	6.52216	6.83628e-10	7.23884e-09	11.9904	Up-Regulated
CORO2B	1.03422	6.68823	6.5189	6.95754e-10	7.3515e-09	11.9733	Up-Regulated
SERPING1	1.03228	13.3897	6.50993	7.30207e-10	7.6991e-09	11.9262	Up-Regulated
LOC154576	1.60625	2.87983	6.50981	7.38808e-10	7.7732e-09	11.9175	Up-Regulated
ITGA11	1.43161	9.96956	6.50801	7.37776e-10	7.76648e-09	11.9161	Up-Regulated
TIFAB	1.44723	2.22572	6.5185	7.93016e-10	8.29501e-09	11.8766	Up-Regulated
ASPA	1.33881	3.88229	6.50192	7.70818e-10	8.06708e-09	11.8761	Up-Regulated
GLP2R	1.86768	3.94753	6.49672	8.10538e-10	8.46485e-09	11.8326	Up-Regulated
IRF8	1.07773	9.16069	6.48961	8.14535e-10	8.50211e-09	11.8197	Up-Regulated
SPSB4	1.30044	4.32812	6.49563	8.24601e-10	8.59811e-09	11.8187	Up-Regulated
ADGRE3	1.65427	2.65224	6.51258	8.60609e-10	8.94997e-09	11.8099	Up-Regulated
LOC221518	1.35166	10.994	6.48678	8.2698e-10	8.61837e-09	11.8049	Up-Regulated
FMO3	1.12882	6.69053	6.48309	8.4353e-10	8.78159e-09	11.7856	Up-Regulated
GUCY1A2	1.03949	4.92878	6.47939	8.69903e-10	9.04187e-09	11.7583	Up-Regulated
KCNS2	1.38049	2.6373	6.48944	8.92766e-10	9.2552e-09	11.753	Up-Regulated
DOK5	1.3237	6.98711	6.47671	8.72948e-10	9.06399e-09	11.7522	Up-Regulated
IGSF10	1.25366	5.05555	6.4677	9.16155e-10	9.45307e-09	11.7051	Up-Regulated
ODD	1.46576	5.86271	6.46376	9.45929e-10	9.73996e-09	11.6767	Up-Regulated
TIMD4	1.96321	2.50401	6.48186	9.87325e-10	1.00822e-08	11.6698	Up-Regulated
LOC221440	1.64684	3.80418	6.46544	9.5827e-10	9.85165e-09	11.6696	Up-Regulated
CYP7B1	1.14945	6.22608	6.4589	9.70853e-10	9.94666e-09	11.6513	Up-Regulated
TWIST2	1.02532	4.35888	6.45849	9.73e-10	9.95652e-09	11.6492	Up-Regulated
HLA-DOB	1.48669	6.00293	6.45545	9.78359e-10	1.00062e-08	11.6411	Up-Regulated
TPSAB1	1.12978	8.81891	6.44975	1.00867e-09	1.0279e-08	11.6114	Up-Regulated
TBC1D10C	1.32331	6.75336	6.44414	1.03944e-09	1.05762e-08	11.5821	Up-Regulated
PRAM1	1.1795	6.15136	6.44033	1.06085e-09	1.07609e-08	11.5623	Up-Regulated
RAB39A	1.40037	2.22788	6.45186	1.0902e-09	1.10303e-08	11.5584	Up-Regulated
HSD17B6	1.24283	5.79893	6.43848	1.07138e-09	1.08565e-08	11.5527	Up-Regulated
RAMP2-AS1	1.05438	3.75098	6.42915	1.12619e-09	1.13483e-08	11.5041	Up-Regulated
MATN3	1.67554	8.96684	6.41871	1.1908e-09	1.19624e-08	11.4497	Up-Regulated
KCNMB1	1.19263	6.4486	6.4159	1.20879e-09	1.2137e-08	11.4351	Up-Regulated
CD79B	1.71453	6.51336	6.40485	1.28219e-09	1.28348e-08	11.3777	Up-Regulated
PTGFR	1.29468	5.69454	6.40325	1.29317e-09	1.29317e-08	11.3694	Up-Regulated
ZNF95	1.12559	5.32866	6.396	1.35821e-09	1.35616e-08	11.3243	Up-Regulated
IL6	1.85459	5.36522	6.39346	1.36245e-09	1.3597e-08	11.3186	Up-Regulated
LOC222674	1.36556	7.16984	6.39055	1.38371e-09	1.38022e-08	11.3035	Up-Regulated
ASB2	1.37792	5.57572	6.39036	1.38512e-09	1.38093e-08	11.3025	Up-Regulated
GPRIN3	1.02836	7.24215	6.38797	1.40283e-09	1.39648e-08	11.2902	Up-Regulated
KIAA0167	1.01221	7.07718	6.37728	1.48497e-09	1.46717e-08	11.2347	Up-Regulated
NGFR	1.60951	8.53467	6.37658	1.49056e-09	1.47122e-08	11.2311	Up-Regulated
LOC134458	1.34669	6.73557	6.36885	1.55303e-09	1.52527e-08	11.1911	Up-Regulated
SELE	1.98823	5.58181	6.35957	1.63155e-09	1.59763e-08	11.1431	Up-Regulated
LOC126807	1.30911	7.74491	6.35421	1.67863e-09	1.64211e-08	11.1154	Up-Regulated
TNNT3	2.08872	2.31964	6.3804	1.93236e-09	1.87272e-08	11.0478	Up-Regulated
TPO	1.64048	2.60468	6.37572	2.06101e-09	1.98379e-08	10.9952	Up-Regulated
XCL2	1.26398	2.66322	6.33779	1.92835e-09	1.87066e-08	10.994	Up-Regulated
PCDHGA5	1.01245	4.70027	6.32978	1.93013e-09	1.87147e-08	10.9822	Up-Regulated
THSD7B	1.49086	4.93357	6.32726	1.97599e-09	1.91219e-08	10.9621	Up-Regulated
CHRNA6	1.23873	1.52163	6.35206	2.23707e-09	2.14386e-08	10.9081	Up-Regulated
PRKCQ	1.25193	5.65131	6.30653	2.18249e-09	2.09562e-08	10.8626	Up-Regulated
WNT2	1.64071	7.49261	6.30867	2.20199e-09	2.11229e-08	10.8595	Up-Regulated
SEMA3G	1.0469	7.89891	6.29455	2.30203e-09	2.20291e-08	10.808	Up-Regulated
GZMM	1.34672	4.37553	6.29272	2.32434e-09	2.22318e-08	10.7986	Up-Regulated
LOC100130816	1.00496	2.03684	6.2982	2.42519e-09	2.30737e-08	10.7768	Up-Regulated
HSPB7	1.2483	7.00574	6.28644	2.40261e-09	2.2914e-08	10.7664	Up-Regulated
CCL13	1.73094	5.40633	6.28636	2.45168e-09	2.33146e-08	10.7522	Up-Regulated
C16ORF89	1.77318	6.0662	6.28236	2.45493e-09	2.33342e-08	10.7454	Up-Regulated
C11ORF21	1.26337	3.5238	6.28349	2.46442e-09	2.34104e-08	10.7444	Up-Regulated
KCNT2	1.07684	4.99181	6.28342	2.46532e-09	2.34104e-08	10.744	Up-Regulated
DO	1.33458	5.00168	6.27042	2.66605e-09	2.52197e-08	10.6706	Up-Regulated
RAB42	1.06684	4.80262	6.26762	2.65308e-09	2.51091e-08	10.6699	Up-Regulated
CAMK4	1.15346	4.76796	6.26653	2.66843e-09	2.52302e-08	10.6643	Up-Regulated
COL23A1	1.11362	4.61204	6.26621	2.67293e-09	2.52606e-08	10.6626	Up-Regulated
ZBTB32	1.05458	3.03828	6.2656	2.70771e-09	2.55405e-08	10.6528	Up-Regulated
ANKRD55	1.48255	2.03475	6.28388	2.82081e-09	2.65315e-08	10.6507	Up-Regulated
SLC2A14	1.01073	4.97322	6.25281	2.89595e-09	2.71994e-08	10.5874	Up-Regulated
WBSCR17	1.04382	5.93212	6.24904	2.9539e-09	2.7725e-08	10.5681	Up-Regulated
GPR55	1.2035	3.55656	6.2512	2.97834e-09	2.79069e-08	10.5657	Up-Regulated
CCL22	1.53942	6.92844	6.24341	3.04241e-09	2.84534e-08	10.5394	Up-Regulated
CCL23	1.6787	3.37583	6.25094	3.17047e-09	2.95393e-08	10.5225	Up-Regulated
CMYA4	1.10956	0.777832	6.2891	3.43703e-09	3.17935e-08	10.5127	Up-Regulated
GPR18	1.47677	3.4663	6.23934	3.13832e-09	2.92811e-08	10.512	Up-Regulated
ZNF626	1.04828	6.42797	6.23585	3.13548e-09	2.92684e-08	10.5074	Up-Regulated
FLJ38708	1.18011	4.17803	6.23247	3.22213e-09	2.99923e-08	10.4836	Up-Regulated
MATK	1.13037	5.74406	6.22696	3.28514e-09	3.05358e-08	10.462	Up-Regulated
ST8SIA1	1.21217	4.85743	6.22495	3.31986e-09	3.0844e-08	10.4518	Up-Regulated
PMCH	1.3379	2.00315	6.23753	3.4722e-09	3.20635e-08	10.4403	Up-Regulated
LOC115545	2.58723	5.98086	6.22192	3.43813e-09	3.17935e-08	10.4231	Up-Regulated
PGM5	1.26886	7.30979	6.21757	3.45088e-09	3.18965e-08	10.4141	Up-Regulated
MAGEL2	1.25443	4.86451	6.21746	3.45287e-09	3.18999e-08	10.4136	Up-Regulated
EMP1	1.00775	12.0794	6.21617	3.4762e-09	3.20705e-08	10.407	Up-Regulated
LEP	2.58121	2.9301	6.24688	3.70297e-09	3.39253e-08	10.4065	Up-Regulated
TNFRSF17	1.74404	3.65734	6.23027	3.60539e-09	3.31388e-08	10.4027	Up-Regulated
IQCA1	1.13615	5.35913	6.21482	3.50096e-09	3.22689e-08	10.4001	Up-Regulated
CD7	1.05486	6.89107	6.20777	3.63254e-09	3.33678e-08	10.3642	Up-Regulated
SPLA2S	2.07395	4.51374	6.2109	3.67721e-09	3.37205e-08	10.3606	Up-Regulated
C3	1.44119	14.405	6.20696	3.64798e-09	3.3468e-08	10.3601	Up-Regulated
SMAD9	1.26467	4.78123	6.20158	3.75211e-09	3.4312e-08	10.3327	Up-Regulated
GREM2	1.65433	5.27715	6.20007	3.89097e-09	3.55489e-08	10.3056	Up-Regulated
OSCAR	1.07504	7.20146	6.18676	4.05455e-09	3.68731e-08	10.2573	Up-Regulated
CBLN4	1.77184	4.10237	6.18762	4.15195e-09	3.7655e-08	10.2426	Up-Regulated
CLEC9A	1.54223	2.39887	6.19598	4.26152e-09	3.85427e-08	10.2375	Up-Regulated
GALNT13	1.38272	4.62794	6.16624	4.51275e-09	4.06662e-08	10.1532	Up-Regulated
LOC93042	2.10363	10.949	6.16548	4.53067e-09	4.0809e-08	10.1494	Up-Regulated
SHISA3	1.39953	3.94677	6.16235	4.60529e-09	4.14246e-08	10.1335	Up-Regulated
CXCL10	1.63403	6.81977	6.15527	4.77821e-09	4.28048e-08	10.0977	Up-Regulated
GCSAML	1.23779	1.96562	6.17284	5.00666e-09	4.46491e-08	10.0934	Up-Regulated
APOBEC3H	1.15038	2.82093	6.15636	4.93128e-09	4.40166e-08	10.0782	Up-Regulated
CACNA1G	1.33633	3.16259	6.14251	5.10647e-09	4.54573e-08	10.0331	Up-Regulated
KIAA0968	1.15995	3.55684	6.14308	5.13765e-09	4.57142e-08	10.0299	Up-Regulated
MGC39981	1.06081	10.2363	6.1411	5.14403e-09	4.57505e-08	10.0259	Up-Regulated
CSMD2	1.16584	6.22954	6.1349	5.31256e-09	4.72068e-08	9.99461	Up-Regulated
MGC4499	1.01353	6.73479	6.12814	5.50232e-09	4.88491e-08	9.96049	Up-Regulated
FCER1A	1.52827	5.71544	6.12929	5.51924e-09	4.89774e-08	9.96024	Up-Regulated
SHC4	1.11752	4.56462	6.1252	5.58718e-09	4.95136e-08	9.94561	Up-Regulated
AFF3	1.34083	5.82009	6.12349	5.63682e-09	4.98865e-08	9.93701	Up-Regulated
KIAA0405	1.39298	9.28228	6.11739	5.81809e-09	5.133e-08	9.90625	Up-Regulated
GAP43	1.3684	5.89721	6.11222	5.97644e-09	5.26097e-08	9.88015	Up-Regulated
TMTC1	1.00091	8.36883	6.11084	6.01927e-09	5.29396e-08	9.87321	Up-Regulated
ST6GALNAC5	1.23328	6.71974	6.10704	6.13897e-09	5.38965e-08	9.85407	Up-Regulated
PHOSPHO1	1.03922	3.07484	6.1057	6.29357e-09	5.51071e-08	9.83541	Up-Regulated
POSTN	1.42552	12.6525	6.10291	6.27199e-09	5.49667e-08	9.83324	Up-Regulated
PGR	1.17607	6.72448	6.09958	6.43779e-09	5.61709e-08	9.81062	Up-Regulated
FCRLA	2.27216	4.12908	6.10387	6.7832e-09	5.90025e-08	9.78268	Up-Regulated
HAS1	2.06537	4.55715	6.09618	6.73196e-09	5.86084e-08	9.77563	Up-Regulated
PRRG3	1.11755	0.772034	6.12168	7.42839e-09	6.40512e-08	9.75146	Up-Regulated
EDIL3	1.44076	8.40988	6.0864	6.83135e-09	5.93428e-08	9.75022	Up-Regulated
PI15	1.4397	7.2465	6.08634	6.83364e-09	5.93428e-08	9.74989	Up-Regulated
ITIH3	1.08322	6.11582	6.07726	7.16224e-09	6.18912e-08	9.70425	Up-Regulated
COL13A1	1.02143	6.28187	6.06941	7.45833e-09	6.42814e-08	9.66489	Up-Regulated
SLC2A3	1.02919	10.3784	6.06804	7.51143e-09	6.46827e-08	9.658	Up-Regulated
CNTN1	1.44219	7.6217	6.06465	7.7108e-09	6.61978e-08	9.63528	Up-Regulated
LOC606724	1.03678	5.51766	6.06342	7.69263e-09	6.60705e-08	9.63484	Up-Regulated
PLCB2	1.04327	8.76195	6.06063	7.80435e-09	6.68848e-08	9.62083	Up-Regulated
CCL14	1.45745	7.35915	6.06076	7.8668e-09	6.73908e-08	9.61582	Up-Regulated
PADI2	1.09515	7.70576	6.03668	8.82947e-09	7.50847e-08	9.50093	Up-Regulated
LOC91006	1.32995	12.3625	6.02333	9.45712e-09	8.00778e-08	9.43423	Up-Regulated
LOC115371	1.30496	5.51587	6.01604	9.81799e-09	8.27438e-08	9.39786	Up-Regulated
CHRNA1	1.51041	3.68736	6.018	1.02396e-08	8.61133e-08	9.37406	Up-Regulated
VCAM1	1.15889	10.0263	5.99451	1.09646e-08	9.18982e-08	9.29059	Up-Regulated
ITGB3	1.05516	7.36465	5.99433	1.09746e-08	9.19431e-08	9.2897	Up-Regulated
LOC100506151	1.42656	11.485	5.99344	1.10247e-08	9.22846e-08	9.28528	Up-Regulated
KIAA1644	1.24106	6.74441	5.99265	1.10693e-08	9.26185e-08	9.28136	Up-Regulated
ANGPTL6	1.04424	2.77347	5.99066	1.14692e-08	9.56407e-08	9.25525	Up-Regulated
GZMB	1.21235	5.42401	5.98618	1.14426e-08	9.54994e-08	9.24915	Up-Regulated
KIF26B	1.0744	8.72651	5.9858	1.14646e-08	9.56407e-08	9.24729	Up-Regulated
TNC	1.29772	10.694	5.97687	1.20009e-08	9.96129e-08	9.20289	Up-Regulated
S100A8	1.2815	6.9943	5.97493	1.21206e-08	1.00565e-07	9.19325	Up-Regulated
TNFRSF19	1.00546	8.3099	5.96985	1.24395e-08	1.03038e-07	9.16804	Up-Regulated
DRP2	1.19861	5.59229	5.96418	1.30182e-08	1.07426e-07	9.12943	Up-Regulated
LOC105377643	1.11343	2.22602	5.96383	1.30412e-08	1.07571e-07	9.12771	Up-Regulated
KCNJ5	1.63169	5.35417	5.95846	1.31845e-08	1.08623e-07	9.11157	Up-Regulated
SNAI2	1.15998	8.75786	5.95845	1.31853e-08	1.08623e-07	9.11151	Up-Regulated
PRIMA1	1.6052	4.98788	5.95729	1.32634e-08	1.09176e-07	9.10578	Up-Regulated
LOC101928772	1.1741	7.61855	5.94128	1.43921e-08	1.17731e-07	9.0265	Up-Regulated
COL6A6	1.44799	3.16858	5.94068	1.49188e-08	1.21638e-07	9.00283	Up-Regulated
PENK	1.92882	3.89269	5.93926	1.49019e-08	1.21551e-07	9.00092	Up-Regulated
AMPD1	1.69218	1.90099	5.9526	1.73091e-08	1.39517e-07	8.9271	Up-Regulated
MILR1	1.04828	5.07493	5.92179	1.60216e-08	1.30049e-07	8.92514	Up-Regulated
TRK	1.22207	3.6608	5.92232	1.61079e-08	1.30687e-07	8.92271	Up-Regulated
MEOX1	1.26835	6.69868	5.90758	1.70839e-08	1.37962e-07	8.86008	Up-Regulated
FAM196A	1.00303	3.37901	5.90753	1.70883e-08	1.37962e-07	8.85983	Up-Regulated
CYSLTR2	1.13561	3.83965	5.90372	1.75602e-08	1.41425e-07	8.83615	Up-Regulated
RGS16	1.05146	9.22856	5.89905	1.78395e-08	1.43616e-07	8.81809	Up-Regulated
C5ORF58	1.00507	2.10684	5.89871	1.9245e-08	1.54116e-07	8.7707	Up-Regulated
HLA-DRB5	1.25604	10.5669	5.88809	1.88592e-08	1.51456e-07	8.76415	Up-Regulated
SLC18A2	1.38585	4.29723	5.8868	1.89833e-08	1.52205e-07	8.75779	Up-Regulated
SLC10A6	1.17877	2.23845	5.88824	1.94557e-08	1.55614e-07	8.74518	Up-Regulated
SELP	1.39519	7.46049	5.8834	1.93131e-08	1.54598e-07	8.74108	Up-Regulated
CD1B	1.56003	2.05168	5.90382	2.13725e-08	1.69574e-07	8.71188	Up-Regulated
LOC220720	1.42959	4.50912	5.87313	2.05029e-08	1.63461e-07	8.68583	Up-Regulated
OSM	1.29556	6.09302	5.87113	2.05507e-08	1.63776e-07	8.68082	Up-Regulated
LOC115448	1.04613	3.50406	5.87163	2.06582e-08	1.645e-07	8.67851	Up-Regulated
CXCR2P1	1.5643	2.18455	5.8854	2.15006e-08	1.70386e-07	8.67741	Up-Regulated
HPGDS	1.10749	5.94435	5.87022	2.08058e-08	1.65609e-07	8.6716	Up-Regulated
PYGM	1.08459	4.45593	5.867	2.09843e-08	1.66829e-07	8.66056	Up-Regulated
LGALS12	1.5072	2.70824	5.87093	2.23168e-08	1.76078e-07	8.63019	Up-Regulated
CETP	1.25246	4.12253	5.85896	2.18544e-08	1.72843e-07	8.62115	Up-Regulated
FABP3	1.01598	6.91437	5.85774	2.19892e-08	1.7377e-07	8.61518	Up-Regulated
CPEB1	1.20595	3.94658	5.85494	2.26504e-08	1.78567e-07	8.59199	Up-Regulated
PLP1	1.908	5.66041	5.85335	2.30128e-08	1.81279e-07	8.57943	Up-Regulated
CADM3	1.69226	6.13466	5.84758	2.33247e-08	1.83591e-07	8.56074	Up-Regulated
EGFL6	1.33948	5.77918	5.84007	2.40405e-08	1.88699e-07	8.52867	Up-Regulated
ZNF486	1.11508	5.03128	5.81676	2.70338e-08	2.10855e-07	8.41487	Up-Regulated
CDR1	1.25948	1.89493	5.82293	2.8367e-08	2.20645e-07	8.39758	Up-Regulated
RGS7BP	1.31326	4.27123	5.81169	2.7941e-08	2.17588e-07	8.38562	Up-Regulated
LOC222200	1.14635	10.4892	5.80487	2.86991e-08	2.22877e-07	8.35691	Up-Regulated
MFAP2	1.20573	10.0363	5.8014	2.92043e-08	2.26356e-07	8.33998	Up-Regulated
LOC116155	1.1855	2.84747	5.79846	3.12748e-08	2.41364e-07	8.29312	Up-Regulated
DIO3	1.17867	6.48399	5.7918	3.0873e-08	2.38449e-07	8.28887	Up-Regulated
ADGRG3	1.26257	4.80822	5.7865	3.14704e-08	2.42495e-07	8.26753	Up-Regulated
NKX3-2	1.22823	5.59241	5.7739	3.37683e-08	2.58389e-07	8.20197	Up-Regulated
FGF2	1.08504	7.71581	5.76306	3.53878e-08	2.70259e-07	8.1538	Up-Regulated
MCOLN2	1.14855	5.06582	5.75638	3.65893e-08	2.78789e-07	8.12144	Up-Regulated
MAL	1.46221	4.08408	5.7309	4.21513e-08	3.18591e-07	7.98977	Up-Regulated
LOC147864	1.23063	3.70195	5.72863	4.26304e-08	3.21844e-07	7.97892	Up-Regulated
LOC115271	1.89048	4.58588	5.72513	4.27607e-08	3.22703e-07	7.9704	Up-Regulated
FLNC	1.25888	9.39125	5.72426	4.29464e-08	3.2387e-07	7.9662	Up-Regulated
LOC90686	1.12341	9.62472	5.72425	4.2948e-08	3.2387e-07	7.96616	Up-Regulated
CDH19	1.67873	4.49637	5.71844	4.55013e-08	3.42211e-07	7.9213	Up-Regulated
LOC283731	1.01762	2.97639	5.71348	4.62957e-08	3.47262e-07	7.90185	Up-Regulated
MMRN1	1.45086	7.57855	5.70732	4.67215e-08	3.49792e-07	7.88457	Up-Regulated
FBN2	1.1974	5.34988	5.70139	4.84587e-08	3.61561e-07	7.85197	Up-Regulated
LIX1	1.21245	1.06815	5.71741	5.24419e-08	3.88794e-07	7.83599	Up-Regulated
KLF17	1.02574	1.58854	5.70874	5.28608e-08	3.91752e-07	7.81611	Up-Regulated
EPHB1	1.06303	4.58839	5.68712	5.16491e-08	3.83491e-07	7.78744	Up-Regulated
LOC102724911	1.37414	4.34788	5.68617	5.3381e-08	3.95106e-07	7.76679	Up-Regulated
ACAN	1.07578	6.16246	5.68029	5.34258e-08	3.95199e-07	7.75468	Up-Regulated
MAB21L2	1.86323	5.10118	5.68212	5.44602e-08	4.01899e-07	7.74721	Up-Regulated
GLDN	1.10782	6.31783	5.67868	5.38559e-08	3.97934e-07	7.74691	Up-Regulated
NTRK3	1.17081	3.92616	5.66636	5.72417e-08	4.21064e-07	7.68786	Up-Regulated
BCAT1	1.14702	9.42125	5.66151	5.86297e-08	4.30473e-07	7.66466	Up-Regulated
LOC149217	2.1638	4.20925	5.67097	6.3043e-08	4.59635e-07	7.64219	Up-Regulated
EMR4	1.14096	2.76995	5.66115	6.1267e-08	4.48192e-07	7.63876	Up-Regulated
TNRC10	1.2982	4.57255	5.65398	6.12696e-08	4.48192e-07	7.62478	Up-Regulated
VIT	1.73222	3.10722	5.65167	6.66084e-08	4.82429e-07	7.57244	Up-Regulated
CECR7	1.18636	2.45157	5.6343	6.84434e-08	4.94633e-07	7.52323	Up-Regulated
CCL19	2.22193	7.83957	5.62239	7.20718e-08	5.18959e-07	7.47038	Up-Regulated
APOD	1.22664	11.7881	5.60949	7.57646e-08	5.4298e-07	7.41643	Up-Regulated
HTRA3	1.09886	11.7798	5.60522	7.73715e-08	5.53493e-07	7.39612	Up-Regulated
PTN	1.09979	6.75172	5.5991	7.97311e-08	5.68523e-07	7.36704	Up-Regulated
LAMP5	1.32489	8.86064	5.59233	8.24247e-08	5.85618e-07	7.33488	Up-Regulated
SCZD9	1.17019	8.14682	5.58445	8.56691e-08	6.06273e-07	7.29752	Up-Regulated
PCDHGA2	1.05696	5.19618	5.58335	8.66991e-08	6.12686e-07	7.28873	Up-Regulated
NALCN	1.11151	7.26841	5.58228	8.6584e-08	6.12091e-07	7.28724	Up-Regulated
APOC1	1.21756	10.0004	5.57665	8.90072e-08	6.28324e-07	7.26053	Up-Regulated
ALOX15B	1.48009	6.42008	5.57311	9.05628e-08	6.38849e-07	7.24377	Up-Regulated
CHRDL2	1.87463	5.50797	5.57504	9.21122e-08	6.48853e-07	7.23868	Up-Regulated
HTR1F	1.17441	2.17479	5.57522	9.26545e-08	6.52208e-07	7.23593	Up-Regulated
TREML1	1.16518	1.73793	5.58005	9.58032e-08	6.71505e-07	7.2287	Up-Regulated
LTB	1.33071	7.96966	5.56881	9.24867e-08	6.51259e-07	7.22343	Up-Regulated
CNKSR2	1.32716	3.74289	5.57098	9.33275e-08	6.56012e-07	7.2231	Up-Regulated
DOC2BL	1.16855	3.93322	5.56889	9.30523e-08	6.5431e-07	7.2203	Up-Regulated
CAPN11	1.11964	2.68145	5.56813	9.46316e-08	6.64431e-07	7.20968	Up-Regulated
ISLR2	1.04297	6.2875	5.56419	9.46015e-08	6.64431e-07	7.20155	Up-Regulated
TNN	1.14277	5.06472	5.55886	9.70966e-08	6.79848e-07	7.17637	Up-Regulated
IDO2	1.1644	1.57474	5.57284	1.02248e-07	7.11136e-07	7.17633	Up-Regulated
LOC197414	1.40658	1.68994	5.57226	1.03332e-07	7.17163e-07	7.17183	Up-Regulated
LAMP3	1.07943	7.64401	5.55422	9.93195e-08	6.93449e-07	7.15447	Up-Regulated
FABP4	1.96405	6.44034	5.55339	9.97252e-08	6.96036e-07	7.15052	Up-Regulated
PTGDS	1.34808	10.1718	5.55046	1.01162e-07	7.05069e-07	7.13668	Up-Regulated
CXCR1	1.5192	3.7567	5.54955	1.02926e-07	7.14847e-07	7.12544	Up-Regulated
XPNPEP2	1.85851	3.72783	5.54537	1.07135e-07	7.41454e-07	7.09546	Up-Regulated
PI16	2.0794	5.70838	5.53736	1.09927e-07	7.5947e-07	7.06474	Up-Regulated
ADAMTS15	1.2875	5.05359	5.53119	1.11828e-07	7.71312e-07	7.0425	Up-Regulated
ART5	1.04087	2.89783	5.52768	1.15972e-07	7.97329e-07	7.01587	Up-Regulated
SPTA1	1.13499	0.705967	5.55196	1.31658e-07	8.91359e-07	6.99899	Up-Regulated
CCL4L1	1.11672	5.62465	5.52248	1.17411e-07	8.04427e-07	6.9982	Up-Regulated
COL11A1	2.10135	10.5043	5.50802	1.2675e-07	8.62735e-07	6.92704	Up-Regulated
LRRC15	1.63595	8.45309	5.50109	1.30247e-07	8.83806e-07	6.89786	Up-Regulated
AFF2	1.06313	4.77042	5.48761	1.3732e-07	9.26079e-07	6.84114	Up-Regulated
LOC154309	1.34694	5.71771	5.48271	1.40617e-07	9.467e-07	6.81821	Up-Regulated
SEPT1	1.02045	7.01436	5.47295	1.47418e-07	9.90126e-07	6.77255	Up-Regulated
WNK3	1.09143	2.91658	5.47268	1.50358e-07	1.00748e-06	6.76176	Up-Regulated
MS4A1	2.62766	5.36008	5.47225	1.51621e-07	1.01422e-06	6.75653	Up-Regulated
GDXYM	1.13648	3.10716	5.46909	1.51108e-07	1.01147e-06	6.75143	Up-Regulated
IDO	1.42265	6.78375	5.46792	1.51043e-07	1.01147e-06	6.74907	Up-Regulated
AOX1	1.48763	7.80449	5.4665	1.52083e-07	1.01663e-06	6.74243	Up-Regulated
SLC25A53	1.17685	4.42308	5.466	1.52451e-07	1.01875e-06	6.74009	Up-Regulated
FCAR	1.36506	1.94496	5.47926	1.67528e-07	1.10938e-06	6.72201	Up-Regulated
FAM107A	1.07687	7.74023	5.45917	1.57566e-07	1.04973e-06	6.7082	Up-Regulated
LOC51158	1.02006	10.0184	5.45649	1.59615e-07	1.06195e-06	6.69571	Up-Regulated
KCNMA1	1.04641	8.47407	5.45618	1.59859e-07	1.06322e-06	6.69424	Up-Regulated
YKL39	1.40917	5.26708	5.45291	1.63376e-07	1.08442e-06	6.67598	Up-Regulated
GP39	1.43068	8.54537	5.44914	1.65381e-07	1.097e-06	6.66141	Up-Regulated
HYKPP	1.16114	2.76233	5.44625	1.75108e-07	1.15725e-06	6.62614	Up-Regulated
AIM2	1.58971	4.49131	5.44335	1.74242e-07	1.15229e-06	6.62233	Up-Regulated
IL6ST	1.32946	9.17045	5.42984	1.81487e-07	1.1966e-06	6.57161	Up-Regulated
ZNF676	1.13455	2.8167	5.42918	1.87654e-07	1.23479e-06	6.55338	Up-Regulated
TRIM63	1.13234	2.35508	5.42864	1.94228e-07	1.27255e-06	6.53576	Up-Regulated
SCUBE3	1.44122	5.60154	5.41415	1.95697e-07	1.28006e-06	6.49878	Up-Regulated
NRXN3	1.04654	5.82153	5.40516	2.04332e-07	1.33301e-06	6.45707	Up-Regulated
CCL17	1.82536	5.21656	5.40609	2.09573e-07	1.36405e-06	6.44666	Up-Regulated
DCANP1	1.37247	3.27553	5.4094	2.15676e-07	1.39917e-06	6.43989	Up-Regulated
CCL21	1.88257	8.7078	5.38616	2.23797e-07	1.449e-06	6.36917	Up-Regulated
SHISA6	1.12034	2.63316	5.39308	2.33042e-07	1.50394e-06	6.36511	Up-Regulated
LYPN	1.16523	6.09023	5.37599	2.34949e-07	1.51575e-06	6.32221	Up-Regulated
ZNF835	1.01296	3.62293	5.3698	2.44792e-07	1.57106e-06	6.28818	Up-Regulated
CASQ2	1.5619	3.76059	5.36546	2.48483e-07	1.59319e-06	6.27091	Up-Regulated
LOC647903	1.2372	3.63988	5.36827	2.52479e-07	1.61672e-06	6.26973	Up-Regulated
PCDH10	1.21023	4.21195	5.35338	2.61718e-07	1.66993e-06	6.21802	Up-Regulated
S100B	1.09782	7.17514	5.35143	2.64163e-07	1.68444e-06	6.20904	Up-Regulated
LINC00839	1.04712	3.9537	5.3479	2.68644e-07	1.71136e-06	6.19281	Up-Regulated
NFATC2	1.20585	6.16764	5.34084	2.77822e-07	1.76642e-06	6.16038	Up-Regulated
TSPAN2	1.02625	8.13855	5.33429	2.86618e-07	1.81534e-06	6.13029	Up-Regulated
LOC115605	1.0956	3.41256	5.32423	3.02314e-07	1.9056e-06	6.08161	Up-Regulated
RGMA	1.12527	7.71959	5.32233	3.0337e-07	1.91104e-06	6.07546	Up-Regulated
CLEC2L	1.22663	2.767	5.3104	3.34005e-07	2.08928e-06	6.003	Up-Regulated
GPR88	1.17315	2.16133	5.30376	3.44619e-07	2.14762e-06	5.97282	Up-Regulated
MCEMP1	1.65374	5.48763	5.29844	3.4348e-07	2.14188e-06	5.96124	Up-Regulated
L1TD1	1.20984	2.78636	5.30081	3.49437e-07	2.17559e-06	5.95906	Up-Regulated
VAV1	1.00457	8.18612	5.28206	3.67112e-07	2.27347e-06	5.89143	Up-Regulated
ADAMTS8	1.50213	6.02538	5.25011	4.2677e-07	2.61024e-06	5.74619	Up-Regulated
FAM48B2	1.08404	0.285069	5.29566	5.31074e-07	3.19387e-06	5.73703	Up-Regulated
ADAMTS18	1.10704	3.71331	5.24007	4.5455e-07	2.76561e-06	5.69372	Up-Regulated
NETO1	1.46834	2.4999	5.24228	4.81899e-07	2.92123e-06	5.674	Up-Regulated
PADI4	1.23979	1.18577	5.241	4.97042e-07	3.00565e-06	5.65902	Up-Regulated
SYNC	1.04347	7.56944	5.22639	4.77076e-07	2.89376e-06	5.63875	Up-Regulated
ZNF80	1.24411	2.23781	5.23279	5.09822e-07	3.07635e-06	5.62651	Up-Regulated
DOM	1.47194	5.18045	5.22246	4.96259e-07	3.00184e-06	5.61194	Up-Regulated
ASGR2	1.11976	3.33079	5.20914	5.19879e-07	3.13131e-06	5.55871	Up-Regulated
SNCAIP	1.08649	6.36985	5.18641	5.75174e-07	3.43403e-06	5.4585	Up-Regulated
HSF5	1.1217	0.964107	5.20431	6.52024e-07	3.83954e-06	5.44576	Up-Regulated
SCML4	1.10659	5.23353	5.1816	5.88225e-07	3.50455e-06	5.43688	Up-Regulated
IL12RB2	1.12515	3.03529	5.18061	5.93932e-07	3.53462e-06	5.43037	Up-Regulated
FOSB	1.48315	9.68819	5.17903	5.95299e-07	3.53923e-06	5.42536	Up-Regulated
ADCY5	1.23779	7.07701	5.17468	6.07493e-07	3.60414e-06	5.40582	Up-Regulated
PLD4	1.16835	6.37417	5.16785	6.27117e-07	3.70233e-06	5.37519	Up-Regulated
ZNF257	1.07661	3.45447	5.16255	6.49233e-07	3.82539e-06	5.34742	Up-Regulated
MAMDC2	1.10301	6.06007	5.15433	6.67835e-07	3.92098e-06	5.31458	Up-Regulated
XCR1	1.30957	1.67062	5.16622	7.86178e-07	4.55362e-06	5.28063	Up-Regulated
MARCO	2.00554	7.51908	5.14166	7.08291e-07	4.14129e-06	5.25793	Up-Regulated
TENM2	1.17326	5.37894	5.11239	8.14968e-07	4.70796e-06	5.12563	Up-Regulated
SLITRK5	1.0931	4.97608	5.10842	8.30003e-07	4.78783e-06	5.10803	Up-Regulated
GALNT16	1.21855	6.64769	5.10777	8.28551e-07	4.78085e-06	5.10692	Up-Regulated
TMEM155	1.03044	1.07763	5.1193	9.07082e-07	5.18557e-06	5.1026	Up-Regulated
LOC648953	1.2682	0.979771	5.12635	9.5439e-07	5.42311e-06	5.09932	Up-Regulated
FAM196B	1.10685	2.04914	5.11296	8.89264e-07	5.09697e-06	5.0934	Up-Regulated
LOC115364	1.05539	9.53844	5.10024	8.57857e-07	4.92981e-06	5.07345	Up-Regulated
LILRA3	1.21021	2.66066	5.10929	9.14872e-07	5.22407e-06	5.07225	Up-Regulated
FAM30A	1.74898	4.00992	5.08971	9.36492e-07	5.33213e-06	5.0126	Up-Regulated
LRRN3	1.12124	4.71396	5.08039	9.39957e-07	5.3457e-06	4.98548	Up-Regulated
TREM1	1.19549	6.75919	5.079	9.54983e-07	5.42492e-06	4.97585	Up-Regulated
BLK	2.06948	4.15905	5.07455	9.8409e-07	5.57266e-06	4.95255	Up-Regulated
ADH1B	1.68771	8.8254	5.06453	1.02054e-06	5.76424e-06	4.91185	Up-Regulated
LOC105379131	1.01256	6.6374	5.0546	1.05815e-06	5.94777e-06	4.8715	Up-Regulated
CRS	1.21368	6.75947	5.03985	1.13212e-06	6.33117e-06	4.8065	Up-Regulated
TMEM156	1.04079	4.709	5.03276	1.1694e-06	6.52489e-06	4.77533	Up-Regulated
CDH2	1.11562	7.80066	5.03209	1.173e-06	6.54313e-06	4.77237	Up-Regulated
LEFTY2	1.0799	2.58071	5.02763	1.23691e-06	6.87638e-06	4.74184	Up-Regulated
ACKR1	1.59425	8.53174	5.00742	1.31275e-06	7.2592e-06	4.66413	Up-Regulated
CX3CR1	1.11679	5.61446	4.99449	1.39231e-06	7.66701e-06	4.60755	Up-Regulated
POU2AF1	1.44992	7.18896	4.98638	1.45093e-06	7.95439e-06	4.5707	Up-Regulated
IL5RA	1.24221	1.29374	4.9954	1.67292e-06	9.07083e-06	4.54675	Up-Regulated
CCR3	1.16751	1.82243	4.97812	1.60143e-06	8.71185e-06	4.51559	Up-Regulated
COL4A4	1.13864	7.05527	4.96469	1.59391e-06	8.67333e-06	4.47757	Up-Regulated
P2RX5	1.16685	5.90088	4.96133	1.61831e-06	8.79401e-06	4.46297	Up-Regulated
LOC388637	1.41571	7.13219	4.95712	1.64949e-06	8.94867e-06	4.44464	Up-Regulated
STAC	1.16098	5.34382	4.95303	1.68753e-06	9.14251e-06	4.42553	Up-Regulated
GRIK3	1.15859	5.44029	4.95093	1.69631e-06	9.18505e-06	4.41774	Up-Regulated
DAZL	1.374	1.14236	4.97735	2.17384e-06	1.14651e-05	4.39174	Up-Regulated
HTR7	1.08517	3.26992	4.94422	1.77125e-06	9.54903e-06	4.38473	Up-Regulated
LOC653786	1.03352	2.68365	4.94397	1.77323e-06	9.5571e-06	4.38366	Up-Regulated
F2RL2	1.11298	8.24681	4.93359	1.83437e-06	9.85169e-06	4.34257	Up-Regulated
TMEM236	1.115	4.84503	4.93323	1.83741e-06	9.86537e-06	4.34097	Up-Regulated
FLT3	1.67201	4.85738	4.92634	1.91969e-06	1.02542e-05	4.30743	Up-Regulated
TM4SF19	1.13549	3.54029	4.90998	2.05717e-06	1.09267e-05	4.23812	Up-Regulated
MUM1L1	1.21167	6.3948	4.90916	2.09152e-06	1.10853e-05	4.23074	Up-Regulated
STON1-GTF2A1L	1.61181	2.90268	4.93193	2.76045e-06	1.42675e-05	4.19597	Up-Regulated
KIAA1045	1.0183	3.19413	4.89858	2.1742e-06	1.14651e-05	4.18788	Up-Regulated
LOC645902	1.05896	2.73774	4.88239	2.39894e-06	1.253e-05	4.11123	Up-Regulated
C1ORF186	1.17035	4.92448	4.87749	2.35998e-06	1.23493e-05	4.10063	Up-Regulated
SORCS3	1.31877	1.47488	4.88495	2.6672e-06	1.38253e-05	4.08305	Up-Regulated
APOC2	1.0775	6.91375	4.87227	2.41569e-06	1.26108e-05	4.07824	Up-Regulated
LMO3	1.17092	6.24478	4.86712	2.47188e-06	1.28837e-05	4.05617	Up-Regulated
AD2	1.01561	12.044	4.85803	2.5742e-06	1.33748e-05	4.01724	Up-Regulated
MYOT	1.19506	2.75961	4.84977	2.78482e-06	1.43859e-05	3.97184	Up-Regulated
KIAA1324L	1.09586	6.99542	4.8474	2.69912e-06	1.39761e-05	3.97177	Up-Regulated
PTPRCAP	1.02606	7.60082	4.83946	2.79624e-06	1.44411e-05	3.93786	Up-Regulated
VAT1L	1.0414	6.47428	4.83825	2.81135e-06	1.45078e-05	3.93269	Up-Regulated
TACR1	1.21728	4.31613	4.80407	3.2972e-06	1.67744e-05	3.78545	Up-Regulated
STMN2	1.096	8.42801	4.79453	3.42572e-06	1.73746e-05	3.74589	Up-Regulated
ZBP1	1.09815	5.82916	4.78992	3.48294e-06	1.76331e-05	3.72725	Up-Regulated
LBP	2.01201	3.05901	4.78859	3.72609e-06	1.86635e-05	3.70597	Up-Regulated
SUGCT	1.1452	6.78808	4.78358	3.58173e-06	1.80639e-05	3.70044	Up-Regulated
CXCL11	1.31423	5.68907	4.78004	3.63822e-06	1.83068e-05	3.68544	Up-Regulated
BMPER	1.14816	3.13779	4.7768	3.70443e-06	1.85926e-05	3.67096	Up-Regulated
POU3F1	1.01546	2.35216	4.75754	4.09404e-06	2.03366e-05	3.58679	Up-Regulated
LOC124689	1.26051	4.21573	4.73627	4.4593e-06	2.20072e-05	3.499	Up-Regulated
JPH2	1.00827	6.47968	4.72717	4.58938e-06	2.25816e-05	3.4629	Up-Regulated
PLA2G2A	2.2706	7.24976	4.72467	4.67381e-06	2.29172e-05	3.4511	Up-Regulated
SIGLEC6	1.20752	3.32398	4.72378	4.85829e-06	2.37277e-05	3.44177	Up-Regulated
FCRL1	1.99407	3.15184	4.71554	5.5412e-06	2.66419e-05	3.38363	Up-Regulated
CEACAM3	1.00788	2.3209	4.70694	5.12532e-06	2.48966e-05	3.37432	Up-Regulated
JAKMIP1	1.10542	4.29175	4.66838	6.01339e-06	2.87029e-05	3.21569	Up-Regulated
SCN3A	1.07481	4.65977	4.66243	6.10521e-06	2.90853e-05	3.1925	Up-Regulated
SLCO1C1	1.00966	2.08477	4.64965	6.59148e-06	3.11662e-05	3.13659	Up-Regulated
SORCS1	1.28925	4.83363	4.63318	6.92755e-06	3.26332e-05	3.07162	Up-Regulated
CD19	2.00565	3.90619	4.60603	8.1257e-06	3.76938e-05	2.95649	Up-Regulated
LOC116200	1.32878	5.21627	4.59632	8.09053e-06	3.75483e-05	2.92044	Up-Regulated
NTRK2	1.0733	8.64033	4.59497	8.13763e-06	3.77314e-05	2.91489	Up-Regulated
CHRNA3	1.07526	5.44776	4.59375	8.18015e-06	3.79197e-05	2.90991	Up-Regulated
LOC91266	1.32524	3.09775	4.58125	8.68696e-06	4.00345e-05	2.85813	Up-Regulated
PRND	1.22469	4.28562	4.56699	9.20214e-06	4.22709e-05	2.80023	Up-Regulated
S100A9	1.02289	8.76238	4.55546	9.63507e-06	4.40957e-05	2.7535	Up-Regulated
CST2	1.37773	7.01259	4.54573	1.01068e-05	4.60734e-05	2.71352	Up-Regulated
NRXN1	1.44034	5.55135	4.53374	1.05681e-05	4.79773e-05	2.66523	Up-Regulated
KCNA1	1.27314	1.70325	4.52908	1.13805e-05	5.13708e-05	2.64346	Up-Regulated
CHIT1	1.801	6.83358	4.52706	1.08719e-05	4.92888e-05	2.63817	Up-Regulated
TCL1A	2.301	3.68888	4.52398	1.19921e-05	5.38242e-05	2.62065	Up-Regulated
GDF10	1.06809	3.30418	4.52219	1.124e-05	5.0806e-05	2.61768	Up-Regulated
PPAPDC1A	1.2508	7.16173	4.51743	1.13604e-05	5.12916e-05	2.59903	Up-Regulated
GPM6A	1.35378	4.85622	4.50692	1.1914e-05	5.35101e-05	2.55647	Up-Regulated
CCNA1	1.08582	2.36639	4.50102	1.22147e-05	5.47737e-05	2.53269	Up-Regulated
S100A12	1.11631	1.85929	4.50026	1.27963e-05	5.71612e-05	2.52815	Up-Regulated
CLEC17A	1.52985	2.52102	4.48755	1.36417e-05	6.05823e-05	2.47596	Up-Regulated
FCRL2	1.55883	3.26366	4.48246	1.35505e-05	6.02446e-05	2.45764	Up-Regulated
CNTN2	1.26408	2.93621	4.46822	1.41978e-05	6.2798e-05	2.40072	Up-Regulated
TBX18	1.16113	5.00865	4.46194	1.43978e-05	6.35973e-05	2.37583	Up-Regulated
CXCL8	1.24931	9.09818	4.45949	1.44601e-05	6.38438e-05	2.36604	Up-Regulated
LOC154247	1.03481	3.62431	4.45227	1.49488e-05	6.57669e-05	2.33716	Up-Regulated
KLHL14	1.28941	2.75212	4.45099	1.54547e-05	6.77365e-05	2.33179	Up-Regulated
TNFRSF13B	1.53681	2.66993	4.44667	1.61114e-05	7.0396e-05	2.31544	Up-Regulated
DGKB	1.1286	3.21403	4.44674	1.52993e-05	6.7151e-05	2.31507	Up-Regulated
TPSD1	1.41225	4.35024	4.44672	1.61076e-05	7.03952e-05	2.31262	Up-Regulated
TSHR	1.0905	1.47154	4.44017	1.67281e-05	7.27855e-05	2.29171	Up-Regulated
LOC100128403	1.18385	6.67007	4.43908	1.57512e-05	6.89595e-05	2.2845	Up-Regulated
ANO4	1.03729	3.92449	4.43485	1.60329e-05	7.00995e-05	2.2676	Up-Regulated
CYP11A1	1.01107	3.24188	4.42979	1.65195e-05	7.19728e-05	2.24769	Up-Regulated
KIRREL3	1.03334	3.95275	4.42867	1.64521e-05	7.17106e-05	2.243	Up-Regulated
LOC91492	1.25635	3.69775	4.42496	1.6806e-05	7.31082e-05	2.2284	Up-Regulated
PMP2	1.44864	2.96048	4.422	1.7782e-05	7.68299e-05	2.21794	Up-Regulated
P2RX1	1.10335	6.01595	4.42172	1.69361e-05	7.36254e-05	2.21537	Up-Regulated
HCAR2	1.21669	4.85688	4.41735	1.73474e-05	7.52318e-05	2.19818	Up-Regulated
CLEC4G	1.23713	1.79531	4.36895	2.22659e-05	9.40666e-05	2.01001	Up-Regulated
RELN	1.46548	6.18061	4.36905	2.10791e-05	8.95308e-05	2.00694	Up-Regulated
SIGLEC12	1.20661	4.25066	4.36537	2.14606e-05	9.09559e-05	1.99268	Up-Regulated
CR2	2.61602	5.40344	4.3544	2.29734e-05	9.68487e-05	1.95112	Up-Regulated
APM-1	2.82277	4.52497	4.34865	2.71194e-05	0.000112694	1.92888	Up-Regulated
SLC6A15	1.08705	1.75934	4.33348	2.62567e-05	0.000109511	1.87425	Up-Regulated
ALK	1.04169	2.08696	4.31871	2.65113e-05	0.000110445	1.81261	Up-Regulated
DNASE1L3	1.37687	3.77698	4.31758	2.63376e-05	0.000109768	1.80635	Up-Regulated
IGF2	1.00888	10.4912	4.31533	2.62981e-05	0.000109649	1.79645	Up-Regulated
RERGL	1.23155	3.24861	4.30473	2.7988e-05	0.000116059	1.75723	Up-Regulated
BCORP1	1.34501	1.9793	4.31505	4.0006e-05	0.000159669	1.73262	Up-Regulated
CRHBP	1.04491	1.98465	4.29349	2.92989e-05	0.000120736	1.71441	Up-Regulated
VPREB3	1.5492	3.59375	4.28543	2.995e-05	0.000123034	1.6812	Up-Regulated
TUSC5	2.09406	2.5877	4.28177	3.36449e-05	0.00013668	1.67507	Up-Regulated
GRM7	1.02639	1.79973	4.26267	3.42686e-05	0.000139071	1.59753	Up-Regulated
PTPN5	1.16821	3.87599	4.25232	3.43484e-05	0.000139366	1.55397	Up-Regulated
IL1RL1	1.01428	5.11941	4.25083	3.42081e-05	0.000138854	1.54653	Up-Regulated
KIF5A	1.21689	4.52614	4.2466	3.47989e-05	0.00014105	1.53026	Up-Regulated
CNR2	1.6071	2.36954	4.24019	3.92584e-05	0.000157224	1.52184	Up-Regulated
CLEC4C	1.34732	0.383617	4.22831	6.00372e-05	0.000229742	1.48098	Up-Regulated
PCOLCE2	1.07608	5.9384	4.23223	3.68836e-05	0.000148829	1.47501	Up-Regulated
TNFSF18	1.08479	1.85967	4.22647	3.99826e-05	0.000159608	1.46577	Up-Regulated
GRM5	1.0187	1.80133	4.22876	3.78753e-05	0.000152445	1.46438	Up-Regulated
FGF5	1.13054	2.68518	4.22331	3.95528e-05	0.000158211	1.44762	Up-Regulated
SLC24A2	1.0961	2.10248	4.21559	4.17535e-05	0.00016604	1.42025	Up-Regulated
TCL6	1.27961	2.83267	4.21006	4.32168e-05	0.000171343	1.40032	Up-Regulated
FAM216B	1.02851	1.68096	4.2085	4.28193e-05	0.000169903	1.3959	Up-Regulated
LOC101929877	1.01037	6.60968	4.20765	4.07274e-05	0.000162319	1.38092	Up-Regulated
BEND4	1.25508	2.41298	4.19082	4.56693e-05	0.000179697	1.32759	Up-Regulated
KLRC4	1.15968	1.36638	4.18897	5.63292e-05	0.000216853	1.31453	Up-Regulated
LOC100129349	1.03879	9.10038	4.19021	4.36835e-05	0.00017278	1.31444	Up-Regulated
SLC8A3	1.04509	3.46841	4.1777	4.62576e-05	0.000181868	1.26873	Up-Regulated
CNTFR	1.4539	3.32803	4.17279	4.74036e-05	0.000185856	1.25104	Up-Regulated
NOS1	1.19064	1.79977	4.15374	5.36591e-05	0.000207665	1.19104	Up-Regulated
FCER2	1.9058	3.20631	4.14963	5.3321e-05	0.000206518	1.17043	Up-Regulated
FLG	1.02362	3.7322	4.15129	5.12758e-05	0.000199672	1.16818	Up-Regulated
MLIP	1.01421	2.52645	4.14397	5.38223e-05	0.000208093	1.1463	Up-Regulated
LOC115664	1.33914	8.91177	4.14405	5.25322e-05	0.000204063	1.13955	Up-Regulated
CXCL5	1.89452	9.7	4.14219	5.30433e-05	0.000205684	1.1332	Up-Regulated
DPPA4	1.02403	0.472317	4.12933	6.59458e-05	0.000250126	1.12397	Up-Regulated
KEL	1.11302	2.38048	4.12255	5.78746e-05	0.000222197	1.06207	Up-Regulated
LCN10	1.13276	4.24371	4.12053	5.78058e-05	0.000221976	1.05174	Up-Regulated
CLEC6A	1.008	0.655577	4.09219	7.9534e-05	0.000296268	0.999347	Up-Regulated
EDM1	1.25577	11.0904	4.10377	6.19054e-05	0.000236069	0.989721	Up-Regulated
GTSF1	1.0109	1.50548	4.08549	7.08912e-05	0.000267244	0.944209	Up-Regulated
CCDC141	1.11654	3.99538	4.07018	7.06552e-05	0.000266506	0.864598	Up-Regulated
FMN2	1.28837	4.89731	4.05866	7.37601e-05	0.00027674	0.821046	Up-Regulated
SNORD116-4	1.22525	4.46097	4.04184	8.15162e-05	0.000302853	0.770955	Up-Regulated
HRH4	1.01064	1.07904	4.02833	8.67541e-05	0.00031997	0.725005	Up-Regulated
ADCYAP1	1.36336	6.62955	4.03026	8.24165e-05	0.000305854	0.716122	Up-Regulated
SCZD16	1.26904	4.48728	4.02912	8.27833e-05	0.000307042	0.711926	Up-Regulated
CD1A	1.15052	5.00002	4.0274	8.40505e-05	0.00031119	0.709321	Up-Regulated
MUSK	1.11167	1.40317	4.00373	9.9387e-05	0.00036164	0.650952	Up-Regulated
CD300LG	1.3733	2.26445	4.00069	9.9372e-05	0.00036164	0.637211	Up-Regulated
HEPN1	1.63546	0.775688	3.99062	0.000127019	0.000450743	0.625763	Up-Regulated
KCNIP1	1.16232	3.9921	4.00194	9.2388e-05	0.000338539	0.613822	Up-Regulated
RAB39B	1.03324	4.97009	4.0011	9.23094e-05	0.000338314	0.609008	Up-Regulated
MYOC	1.36614	1.47515	3.98889	0.000106783	0.000385703	0.601953	Up-Regulated
FIGF	1.07028	2.71069	3.98761	9.76522e-05	0.000356179	0.561432	Up-Regulated
ECEL1	1.03236	5.32494	3.97768	0.000101264	0.000368199	0.524451	Up-Regulated
CMA1	1.4714	1.8213	3.94988	0.000128752	0.000456532	0.484235	Up-Regulated
MMP12	1.1659	7.22111	3.95178	0.000111446	0.00040058	0.428339	Up-Regulated
PCDHGB5	1.13395	6.39522	3.95059	0.000111957	0.000402274	0.424016	Up-Regulated
DES	1.70158	7.64706	3.94555	0.000114364	0.0004104	0.406777	Up-Regulated
TMEM215	1.02402	1.43444	3.93645	0.00012512	0.000444643	0.402415	Up-Regulated
NPTX1	1.013	7.7096	3.94142	0.000115968	0.000415629	0.390812	Up-Regulated
IL24	1.02614	2.03042	3.91953	0.000128871	0.000456823	0.325071	Up-Regulated
SLC4A10	1.35041	4.20643	3.92162	0.000125812	0.000446859	0.322435	Up-Regulated
SLC5A7	1.21891	2.31045	3.90621	0.000143566	0.000503946	0.299627	Up-Regulated
HHIP	1.05243	5.52292	3.89889	0.000136679	0.000481994	0.238739	Up-Regulated
LOC145053	1.32343	3.07666	3.87132	0.00015404	0.000537565	0.149466	Up-Regulated
PLIN1	1.49711	4.5675	3.84379	0.00016806	0.000580447	0.0413112	Up-Regulated
CBLN1	1.05706	4.1087	3.83725	0.000173153	0.000596373	0.0216707	Up-Regulated
FAM129C	1.57165	3.02784	3.81494	0.000191016	0.000651542	-0.0460229	Up-Regulated
COL19A1	1.2549	1.73026	3.80649	0.000204721	0.000693386	-0.0536545	Up-Regulated
LCN6	1.02242	1.2768	3.77704	0.000238898	0.000794586	-0.133265	Up-Regulated
PKHD1L1	1.16586	2.461	3.77548	0.000226902	0.000759412	-0.164043	Up-Regulated
GHRL	1.3166	4.76467	3.78425	0.00021071	0.000710509	-0.165714	Up-Regulated
PLZF	1.0651	6.46838	3.77943	0.000214165	0.000720563	-0.183752	Up-Regulated
CMTM5	1.01337	1.40986	3.76918	0.000232707	0.000777001	-0.186193	Up-Regulated
GPR15	1.07967	1.46837	3.73795	0.00027431	0.000898764	-0.256154	Up-Regulated
NKAIN2	1.00343	1.98217	3.75246	0.000240733	0.000799884	-0.262586	Up-Regulated
STAB2	1.12957	2.69974	3.73699	0.000255729	0.000843756	-0.314995	Up-Regulated
VIP	1.44738	5.20738	3.70136	0.000286495	0.000935746	-0.451107	Up-Regulated
PAX5	1.46825	3.04708	3.69	0.000307406	0.000997455	-0.465247	Up-Regulated
MYBPC2	1.0298	2.15672	3.68809	0.000306196	0.000993855	-0.478624	Up-Regulated
COL6A5	1.0313	2.46104	3.68499	0.000310753	0.00100567	-0.486332	Up-Regulated
GFAP	1.01824	3.99172	3.68898	0.000299275	0.000973147	-0.494741	Up-Regulated
XG	1.05676	2.93988	3.66327	0.000331677	0.0010685	-0.573591	Up-Regulated
DPYSL5	1.05521	2.28615	3.64701	0.000362965	0.00116022	-0.601511	Up-Regulated
LINGO3	1.0826	2.02469	3.62522	0.000411748	0.00129874	-0.64188	Up-Regulated
LRRTM3	1.46755	3.82793	3.63066	0.000379899	0.00120791	-0.667267	Up-Regulated
TNFRSF13C	1.08434	2.80113	3.63221	0.00037102	0.00118177	-0.67809	Up-Regulated
RSPO2	1.09855	2.39576	3.61518	0.000398807	0.00126113	-0.724504	Up-Regulated
TMEM196	1.28116	2.81937	3.59758	0.000426034	0.00133974	-0.781088	Up-Regulated
PROK1	1.08306	1.70151	3.58197	0.000454915	0.00142197	-0.822476	Up-Regulated
PLCXD3	1.0165	6.94866	3.58688	0.00043148	0.00135471	-0.842645	Up-Regulated
CIDEA	1.99069	1.99111	3.53116	0.000615302	0.00186552	-0.898133	Up-Regulated
SFTP1	1.05074	1.9868	3.52456	0.000563429	0.00172357	-0.999334	Up-Regulated
MMP11	1.06461	13.1794	3.53099	0.000526285	0.00162148	-1.02796	Up-Regulated
HMGCLL1	1.15304	4.21091	3.48551	0.000619849	0.00187816	-1.17198	Up-Regulated
AGTR2	1.27404	1.19523	3.41368	0.000908066	0.00264802	-1.24034	Up-Regulated
MADCAM1	1.22821	5.02987	3.44781	0.000705052	0.00210918	-1.29734	Up-Regulated
SPIB	1.08115	6.19592	3.43867	0.000728619	0.00217213	-1.32502	Up-Regulated
PLIN4	1.23921	7.01443	3.43338	0.000740323	0.0022037	-1.34554	Up-Regulated
CNTNAP5	1.00873	1.27441	3.34059	0.00108072	0.00309403	-1.54901	Up-Regulated
SAA1	1.03357	8.0843	3.35463	0.000971929	0.00281557	-1.59235	Up-Regulated
CXCL14	1.04839	11.1401	3.34015	0.00101871	0.00293348	-1.64159	Up-Regulated
ADH1A	1.00537	3.7041	3.30651	0.00115216	0.00327015	-1.72976	Up-Regulated
ELAVL4	1.02518	3.24504	3.28988	0.00121945	0.00343797	-1.77921	Up-Regulated
LOC125818	1.08901	6.85522	3.28221	0.00124565	0.00350283	-1.80988	Up-Regulated
MYETS1	1.06493	1.85603	3.17209	0.00185181	0.00500394	-2.08018	Up-Regulated
FDCSP	1.61662	5.64841	3.1612	0.00186198	0.00502935	-2.16859	Up-Regulated
BMP5	1.04072	4.07595	3.12807	0.00206823	0.00552386	-2.27094	Up-Regulated
SLC6A4	1.06553	3.67443	3.12558	0.002083	0.00555653	-2.28108	Up-Regulated
CLC	1.14149	1.27876	3.0686	0.00268611	0.0069726	-2.28251	Up-Regulated
TAC2	1.09388	2.96561	3.07981	0.00242857	0.00638366	-2.39785	Up-Regulated
LOC653409	1.0891	5.84358	2.97778	0.00415411	0.0102621	-2.39857	Up-Regulated
LOC196023	1.15111	5.66148	3.07748	0.00241726	0.00635564	-2.43458	Up-Regulated
LOC115057	1.25686	1.39717	2.97355	0.00350366	0.00882721	-2.61512	Up-Regulated
LOC648271	1.20357	5.12598	3.00492	0.00306034	0.00782695	-2.6244	Up-Regulated
NPHS1	1.15086	4.30959	2.96078	0.00351207	0.00884501	-2.74686	Up-Regulated
G6PC2	1.53811	6.53514	2.94211	0.00371139	0.00927729	-2.80595	Up-Regulated
FLJ37228	1.08098	4.72013	2.92621	0.00389395	0.00968468	-2.85246	Up-Regulated
PAPPA2	1.18969	4.17403	2.88481	0.00441388	0.0108254	-2.96842	Up-Regulated
KRTAP10-12	2.15764	-0.456602	3.84854	0.0159703	0.0338469	-3.1544	Up-Regulated
TMEM132D	1.04515	4.25921	2.81236	0.00549585	0.0132055	-3.15886	Up-Regulated
GABRP	1.24406	10.1222	2.80425	0.0056026	0.0134294	-3.19907	Up-Regulated
EPYC	1.31474	5.13533	2.77665	0.00615523	0.0146054	-3.21858	Up-Regulated
LOC86801	3.42918	0.372091	5.06195	0.0117341	0.025789	-3.23323	Up-Regulated
XAGE5	7.44063	2.96764	8.4054	0.00890543	0.020268	-3.62498	Up-Regulated
FLJ20839	1.07393	0.952165	2.53065	0.0127332	0.0277045	-3.70375	Up-Regulated
REG3G	1.90694	7.41588	2.51753	0.0128951	0.0280168	-3.84611	Up-Regulated
SLC30A8	1.26782	8.62373	2.54234	0.0118922	0.0260987	-3.85583	Up-Regulated
GCG	1.69526	10.9012	2.40369	0.0173042	0.0363352	-4.181	Up-Regulated
LOC101927064	-1.29781	9.49143	-9.82986	1.6382e-18	7.57093e-17	31.4563	Down-Regulated
RASSF7	-1.31892	10.6296	-9.65972	4.89686e-18	2.07579e-16	30.3788	Down-Regulated
SPIRE2	-1.49326	8.51799	-9.32548	4.13804e-17	1.50184e-15	28.2793	Down-Regulated
CAMSAP3	-1.2245	9.36185	-9.24274	6.9923e-17	2.43071e-15	27.7635	Down-Regulated
EPS8L2	-1.02015	11.3532	-9.09915	1.73139e-16	5.48828e-15	26.872	Down-Regulated
LMNTD2	-1.33073	5.88941	-8.44746	9.9321e-15	2.39582e-13	22.8934	Down-Regulated
OVOL2	-1.10259	7.39285	-8.22478	3.85558e-14	8.3257e-13	21.5622	Down-Regulated
LOC143666	-1.00575	4.96694	-7.90582	2.61795e-13	4.94585e-12	19.6834	Down-Regulated
RHPN1	-1.24724	8.56602	-7.8704	3.23179e-13	6.00796e-12	19.4769	Down-Regulated
C10ORF95	-1.06466	4.37723	-7.67267	1.03885e-12	1.7608e-11	18.3327	Down-Regulated
KRN1L	-1.50241	3.21685	-7.62306	1.41576e-12	2.35744e-11	18.032	Down-Regulated
KIFC2	-1.10473	9.23338	-7.58413	1.74444e-12	2.8493e-11	17.825	Down-Regulated
GOLT1A	-1.09415	7.12246	-7.55403	2.11739e-12	3.42173e-11	17.6378	Down-Regulated
F12	-1.31349	7.09322	-7.54898	2.14126e-12	3.45553e-11	17.6243	Down-Regulated
PKP3	-1.20979	11.096	-7.46733	3.44092e-12	5.39742e-11	17.1599	Down-Regulated
CRB3	-1.04174	8.70191	-7.26246	1.11845e-11	1.58929e-10	16.0064	Down-Regulated
PRR7	-1.5209	5.76236	-7.21837	1.43834e-11	2.00213e-10	15.7604	Down-Regulated
RHBDL1	-1.33677	5.57286	-6.93668	7.03849e-11	8.76708e-10	14.2085	Down-Regulated
NOXA1	-1.48007	7.5695	-6.89008	9.12314e-11	1.11324e-09	13.9551	Down-Regulated
LOC113230	-1.04024	7.96359	-6.82289	1.3239e-10	1.57467e-09	13.5916	Down-Regulated
PCSK4	-1.36242	5.55326	-6.81223	1.40421e-10	1.6612e-09	13.5341	Down-Regulated
REEP6	-1.0567	8.49484	-6.72085	2.3216e-10	2.64828e-09	13.0435	Down-Regulated
MGC14966	-1.10028	4.91554	-6.68328	2.85164e-10	3.1994e-09	12.8429	Down-Regulated
NPAS1	-1.31914	4.07454	-6.67196	3.03348e-10	3.38614e-09	12.7826	Down-Regulated
LOC133400	-1.19144	6.44684	-6.65451	3.37656e-10	3.74584e-09	12.6808	Down-Regulated
RNF208	-1.03734	6.81585	-6.62328	3.95472e-10	4.34663e-09	12.524	Down-Regulated
LOC115023	-1.08237	6.81263	-6.6134	4.17287e-10	4.57536e-09	12.4716	Down-Regulated
DNASE1L2	-1.36719	3.7358	-6.61267	4.28906e-10	4.68976e-09	12.4502	Down-Regulated
ONECUT3	-1.83142	4.16504	-6.61916	5.63555e-10	6.06811e-09	12.2498	Down-Regulated
CRACR2B	-1.29988	9.37832	-6.54425	6.06858e-10	6.48495e-09	12.1065	Down-Regulated
COMTD1	-1.01028	8.32872	-6.4715	8.97688e-10	9.28675e-09	11.725	Down-Regulated
MIF	-1.13	11.9633	-6.39019	1.38638e-09	1.38149e-08	11.3016	Down-Regulated
C2CD4D	-1.1229	3.12614	-6.37714	1.50154e-09	1.47984e-08	11.2266	Down-Regulated
CTM	-1.21141	7.3108	-6.35818	1.64365e-09	1.60868e-08	11.1359	Down-Regulated
LOC129863	-1.0245	11.6119	-6.34303	1.78123e-09	1.73475e-08	11.0576	Down-Regulated
SPACA4	-1.4476	3.57674	-6.33897	1.85737e-09	1.80623e-08	11.0224	Down-Regulated
BIK	-1.11525	8.24604	-6.26288	2.72019e-09	2.56338e-08	10.6456	Down-Regulated
KCNK7	-1.08988	3.49302	-6.23226	3.19503e-09	2.97541e-08	10.4891	Down-Regulated
DKFZP434G1017	-1.04234	4.77351	-6.18982	3.99021e-09	3.63716e-08	10.2729	Down-Regulated
TBX6	-1.15311	6.71072	-6.17002	4.42481e-09	3.99282e-08	10.1724	Down-Regulated
SLC6A8	-1.00345	10.6202	-6.12466	5.60288e-09	4.96083e-08	9.94288	Down-Regulated
LOC115627	-2.00173	3.84389	-6.07068	9.38663e-09	7.9515e-08	9.51124	Down-Regulated
C2ORF70	-1.27084	4.26301	-6.00337	1.06557e-08	8.94229e-08	9.32377	Down-Regulated
AMH	-1.84348	3.5956	-5.98814	1.23599e-08	1.02464e-07	9.20212	Down-Regulated
FOXA2	-1.09198	8.66808	-5.96816	1.2547e-08	1.03798e-07	9.15968	Down-Regulated
LOC116391	-1.04562	7.11431	-5.95368	1.35101e-08	1.11068e-07	9.08789	Down-Regulated
RXFP4	-1.30718	2.53677	-5.79229	3.27732e-08	2.51359e-07	8.25328	Down-Regulated
HIST3H2A	-1.38733	5.10591	-5.75667	3.65376e-08	2.78503e-07	8.12281	Down-Regulated
CNFN	-1.12069	4.16007	-5.72586	4.26055e-08	3.21778e-07	7.97392	Down-Regulated
PLA2G4D	-1.0467	2.03646	-5.68214	5.69352e-08	4.18965e-07	7.72133	Down-Regulated
C9ORF163	-1.00922	3.13732	-5.64783	6.31572e-08	4.60298e-07	7.5954	Down-Regulated
FOXH1	-1.38899	3.5048	-5.64108	6.57423e-08	4.7738e-07	7.55927	Down-Regulated
LINC00628	-1.01765	1.47373	-5.64196	7.31905e-08	5.25898e-07	7.49844	Down-Regulated
TRIM7	-1.12757	7.137	-5.59665	8.06969e-08	5.74943e-07	7.35539	Down-Regulated
UCN	-1.13384	2.43061	-5.56566	9.90948e-08	6.92124e-07	7.17958	Down-Regulated
DCST2	-1.09697	3.47525	-5.55794	9.75356e-08	6.82439e-07	7.172	Down-Regulated
ADAT3	-1.19396	5.92023	-5.53489	1.09141e-07	7.54299e-07	7.06325	Down-Regulated
CCDC183	-1.22706	4.44007	-5.52806	1.13544e-07	7.82001e-07	7.02772	Down-Regulated
EFNA3	-1.04299	7.62939	-5.52596	1.1399e-07	7.848e-07	7.0212	Down-Regulated
LOC286209	-1.11328	3.85243	-5.49898	1.29956e-07	8.82431e-07	6.89444	Down-Regulated
RBBP8NL	-1.24792	5.65015	-5.37579	2.37902e-07	1.53127e-06	6.31575	Down-Regulated
BTBD16	-1.40023	3.77822	-5.37087	2.42143e-07	1.55506e-06	6.29587	Down-Regulated
PRR22	-1.02101	4.90544	-5.33605	2.84234e-07	1.80312e-06	6.13835	Down-Regulated
LIME1	-1.13469	8.61505	-5.32912	2.93752e-07	1.85814e-06	6.10656	Down-Regulated
KREMEN2	-1.19411	3.73598	-5.32831	2.98192e-07	1.88262e-06	6.09759	Down-Regulated
SLC7A4	-1.15598	6.28484	-5.31948	3.07505e-07	1.93462e-06	6.06239	Down-Regulated
CCDC64B	-1.07965	9.36825	-5.31764	3.11916e-07	1.9605e-06	6.05143	Down-Regulated
KIAA1875	-1.11936	4.17892	-5.31308	3.16983e-07	1.98919e-06	6.0331	Down-Regulated
LINC00896	-1.10975	3.02284	-5.30094	3.41346e-07	2.13058e-06	5.96997	Down-Regulated
STRC	-1.09541	3.76586	-5.29508	3.4519e-07	2.14983e-06	5.95084	Down-Regulated
C20ORF195	-1.16367	3.69626	-5.2917	3.50766e-07	2.18043e-06	5.93538	Down-Regulated
SPINK7	-1.58072	0.720265	-5.23563	1.04535e-06	5.88755e-06	5.21027	Down-Regulated
PCP2	-1.11594	2.43291	-5.13302	7.75811e-07	4.49752e-06	5.1986	Down-Regulated
CKMT1A	-1.09822	7.90353	-5.12429	7.67637e-07	4.45666e-06	5.18044	Down-Regulated
C2ORF82	-1.35196	1.81794	-5.11546	9.0581e-07	5.1813e-06	5.09261	Down-Regulated
SMIM6	-1.01311	6.9299	-5.0967	8.71971e-07	5.00511e-06	5.05774	Down-Regulated
NTF4	-1.58388	3.48644	-5.09666	9.31395e-07	5.30769e-06	5.03184	Down-Regulated
LINC00482	-1.17599	5.21516	-5.0599	1.03276e-06	5.82659e-06	4.89487	Down-Regulated
RGL3	-1.01815	8.2856	-5.03359	1.16501e-06	6.50221e-06	4.77895	Down-Regulated
MROH7	-1.0184	6.23405	-5.03188	1.17948e-06	6.57559e-06	4.76987	Down-Regulated
ZDHHC11	-1.05781	5.44538	-5.02531	1.20992e-06	6.73576e-06	4.74257	Down-Regulated
PNCK	-2.01088	3.27479	-5.01144	1.35759e-06	7.49041e-06	4.66326	Down-Regulated
TERT	-1.39402	1.63086	-4.97448	1.82291e-06	9.79812e-06	4.45214	Down-Regulated
DEGS2	-1.1038	7.72909	-4.93061	1.85917e-06	9.96328e-06	4.32966	Down-Regulated
C4ORF48	-1.58367	6.28157	-4.92373	1.94234e-06	1.03668e-05	4.29601	Down-Regulated
RAPGEFL1	-1.01674	9.86798	-4.89957	2.13772e-06	1.12999e-05	4.19559	Down-Regulated
PITX1	-1.4183	8.45837	-4.84079	2.802e-06	1.44634e-05	3.94153	Down-Regulated
DOC2A	-1.0745	3.62553	-4.83052	2.90968e-06	1.49801e-05	3.89971	Down-Regulated
FXYD3	-1.04238	11.9268	-4.81042	3.181e-06	1.62458e-05	3.8142	Down-Regulated
ATG9B	-1.09961	6.29664	-4.78961	3.48768e-06	1.76518e-05	3.72595	Down-Regulated
DNAH2	-1.15834	6.86552	-4.7853	3.55468e-06	1.79458e-05	3.7077	Down-Regulated
SLC26A5	-1.1318	0.978953	-4.78446	4.10183e-06	2.03701e-05	3.66443	Down-Regulated
CA14	-1.08429	3.89981	-4.77431	3.74536e-06	1.8741e-05	3.66043	Down-Regulated
SCP	-1.11215	5.26529	-4.76056	3.97881e-06	1.98177e-05	3.60248	Down-Regulated
TLX1	-1.29553	2.4467	-4.68277	5.84839e-06	2.79626e-05	3.26811	Down-Regulated
APOBEC1	-1.53288	5.25145	-4.67295	6.05305e-06	2.88574e-05	3.23016	Down-Regulated
DCTN1-AS1	-1.11554	1.0034	-4.64845	7.89647e-06	3.67166e-05	3.08628	Down-Regulated
FXYD4	-1.75314	0.979972	-4.66856	1.01401e-05	4.62041e-05	3.02688	Down-Regulated
C19ORF45	-1.12439	2.17744	-4.58912	8.66772e-06	3.99551e-05	2.88594	Down-Regulated
TPGS1	-1.24525	6.49375	-4.55231	9.76536e-06	4.46403e-05	2.74067	Down-Regulated
KISS1	-1.49708	2.94809	-4.55135	9.96592e-06	4.54626e-05	2.73527	Down-Regulated
FLJ13459	-1.46407	8.46992	-4.50839	1.17669e-05	5.29395e-05	2.56266	Down-Regulated
LINC00589	-1.09183	1.16916	-4.49891	1.33657e-05	5.95184e-05	2.51554	Down-Regulated
LDLRAD1	-1.2371	1.27324	-4.4235	1.83922e-05	7.91379e-05	2.21796	Down-Regulated
WFDC10B	-1.1325	1.3873	-4.38997	2.094e-05	8.89973e-05	2.08769	Down-Regulated
TM4SF5	-1.30678	7.52111	-4.38463	1.99293e-05	8.50857e-05	2.06876	Down-Regulated
MARCH11	-1.57354	0.429585	-4.40338	2.83684e-05	0.00011734	2.05706	Down-Regulated
LINC00930	-1.14667	2.16929	-4.36421	2.20006e-05	9.30251e-05	1.98888	Down-Regulated
WBSCR28	-1.08922	1.62941	-4.34733	2.39378e-05	0.000100571	1.92326	Down-Regulated
UGT1A9	-1.32183	5.97723	-4.32548	2.67579e-05	0.000111355	1.83868	Down-Regulated
SYT8	-1.47105	9.61863	-4.30309	2.80973e-05	0.00011639	1.75078	Down-Regulated
OR7E91P	-1.32496	2.76662	-4.29773	2.96565e-05	0.000122057	1.73189	Down-Regulated
CYSRT1	-1.03184	4.41773	-4.27898	3.08285e-05	0.000126198	1.65657	Down-Regulated
CA9	-1.65867	9.1256	-4.24775	3.46383e-05	0.000140462	1.53465	Down-Regulated
CCDC42B	-1.13707	4.08367	-4.24603	3.49665e-05	0.000141613	1.52847	Down-Regulated
MYCNOS	-1.04329	-0.210505	-4.2343	7.11498e-05	0.000268014	1.33053	Down-Regulated
NMU	-1.27804	6.4998	-4.19307	4.41597e-05	0.000174347	1.33027	Down-Regulated
C20orf148	-1.21251	3.27598	-4.14976	5.26026e-05	0.000204296	1.16694	Down-Regulated
AMN	-1.29726	7.68556	-4.13704	5.41401e-05	0.000209199	1.11375	Down-Regulated
LHB	-1.09065	2.35814	-4.11239	6.0821e-05	0.000232158	1.02642	Down-Regulated
ITPKA	-1.04605	6.72843	-4.07346	6.96003e-05	0.000262878	0.875962	Down-Regulated
PDE4C	-1.03559	7.07006	-4.04592	7.73693e-05	0.000289075	0.773043	Down-Regulated
RNF183	-1.00707	5.54377	-4.04208	7.85394e-05	0.000292894	0.758849	Down-Regulated
MGC35338	-1.00443	3.77996	-4.03908	7.99675e-05	0.000297602	0.750198	Down-Regulated
CDIPT-AS1	-1.15611	1.04273	-4.00743	0.000104234	0.000377618	0.671978	Down-Regulated
NXF5	-1.5946	-0.101669	-4.05372	0.000178702	0.000613242	0.616441	Down-Regulated
CACNG6	-1.72246	3.2452	-3.98115	0.000104776	0.000379087	0.554916	Down-Regulated
LOC649462	-1.65054	2.10479	-3.93989	0.000131761	0.000466149	0.425207	Down-Regulated
CMD1D	-1.24958	4.05688	-3.94645	0.000115335	0.00041351	0.416024	Down-Regulated
LOC105376902	-1.31891	4.05821	-3.90631	0.000135786	0.000479359	0.27695	Down-Regulated
GUCY1B2	-1.13835	3.62987	-3.87175	0.000154713	0.000539508	0.154431	Down-Regulated
DQX1	-1.53048	4.93426	-3.86414	0.000156772	0.000545847	0.118093	Down-Regulated
ENTPD8	-1.01099	6.78591	-3.86533	0.000154946	0.000540153	0.117769	Down-Regulated
LOC100506781	-1.14718	3.67008	-3.83561	0.000176153	0.000605228	0.0227656	Down-Regulated
UGT1A10	-1.39654	8.86771	-3.82499	0.000183288	0.000627674	-0.0131177	Down-Regulated
PRSS55	-1.03176	0.0578247	-3.77888	0.000303442	0.000985403	-0.105824	Down-Regulated
CALHM3	-1.45578	4.60063	-3.79527	0.000204008	0.000691566	-0.121054	Down-Regulated
TEX101	-1.67706	0.0315575	-3.79972	0.000468619	0.00145927	-0.210883	Down-Regulated
GHRHR	-1.40821	1.07346	-3.73431	0.000297339	0.00096749	-0.262068	Down-Regulated
ABHD11-AS1	-1.00506	5.87368	-3.75246	0.000236676	0.000789051	-0.277582	Down-Regulated
C6orf17	-1.04183	3.40032	-3.68043	0.000311666	0.00100797	-0.515696	Down-Regulated
HMGCS2	-1.68371	6.93024	-3.67996	0.000309286	0.00100273	-0.525674	Down-Regulated
DKK4	-1.26948	2.94679	-3.63915	0.000365378	0.00116718	-0.646337	Down-Regulated
ETNPPL	-1.10195	0.706836	-3.59614	0.000465587	0.00145074	-0.727415	Down-Regulated
LINC00483	-1.45107	3.70284	-3.56709	0.000477818	0.00148698	-0.874669	Down-Regulated
TEX35	-1.0837	0.538409	-3.5262	0.000655688	0.00197615	-0.907426	Down-Regulated
AXDND1	-1.34062	2.94513	-3.55218	0.000500341	0.0015491	-0.930923	Down-Regulated
TFF3	-1.35987	10.6111	-3.55376	0.000485519	0.00150881	-0.95278	Down-Regulated
DFNB36	-1.04273	6.75584	-3.55284	0.000487108	0.0015128	-0.955828	Down-Regulated
CMD2A	-1.313	2.62675	-3.53812	0.000534513	0.00164478	-0.960433	Down-Regulated
CARD18	-1.39386	0.991821	-3.51524	0.00114678	0.0032605	-0.995395	Down-Regulated
PHGR1	-1.54291	4.99557	-3.53507	0.000524356	0.00161629	-1.00178	Down-Regulated
NPHS2	-1.24456	0.122528	-3.48338	0.000862277	0.00252717	-1.00782	Down-Regulated
TFF1	-1.64467	11.1909	-3.50114	0.000586094	0.0017871	-1.12254	Down-Regulated
HTN1	-3.55965	1.10228	-6.19044	0.000676956	0.0020322	-1.1757	Down-Regulated
TRPM5	-1.11391	4.53927	-3.48278	0.000627378	0.00189893	-1.17746	Down-Regulated
SLC22A10	-1.1864	-0.241387	-3.39144	0.0011759	0.0033299	-1.27962	Down-Regulated
DMBX1	-1.06891	3.92081	-3.44783	0.000711152	0.00212582	-1.28419	Down-Regulated
GLRA2	-1.21293	0.164178	-3.38761	0.00106866	0.00306216	-1.30104	Down-Regulated
MYF5	-3.10704	0.459528	-4.36908	0.00218011	0.0057945	-1.38262	Down-Regulated
PPP1R3A	-1.04307	-0.680939	-3.5953	0.00283637	0.00732229	-1.47098	Down-Regulated
SOX25	-1.38521	5.25182	-3.36412	0.000949797	0.00275914	-1.54683	Down-Regulated
DLX6-AS1	-1.16839	0.688941	-3.3051	0.00141403	0.00393548	-1.55175	Down-Regulated
OR7E24	-1.16074	-0.782752	-3.93821	0.00320045	0.00815051	-1.62101	Down-Regulated
LOC91681	-1.21447	4.57758	-3.3098	0.00113828	0.00323898	-1.72027	Down-Regulated
LOC647582	-1.04138	2.86426	-3.30553	0.00115858	0.00328651	-1.72881	Down-Regulated
LOC142972	-1.25244	1.71967	-3.22515	0.0025768	0.00672624	-1.74161	Down-Regulated
TRIM40	-1.02787	1.66329	-3.28079	0.00130599	0.00365848	-1.74761	Down-Regulated
PASD1	-2.69981	-0.380465	-3.76884	0.00348036	0.00877632	-1.78913	Down-Regulated
OTP	-1.00688	0.0904579	-3.20904	0.00189155	0.00510029	-1.8304	Down-Regulated
LY6G6C	-1.01116	2.44606	-3.25391	0.00138673	0.00386603	-1.87373	Down-Regulated
MYH5~withdrawn	-1.05836	3.02121	-3.2471	0.00140715	0.00391688	-1.9083	Down-Regulated
SPRR1A	-1.47108	4.65071	-3.21305	0.00158422	0.00435704	-1.99859	Down-Regulated
NTSR1	-1.33161	5.61864	-3.2187	0.00152995	0.00422368	-2.01442	Down-Regulated
OR4N3P	-3.2965	-0.0680268	-7.11146	0.000664852	0.00200103	-2.01549	Down-Regulated
MMD2	-1.51023	0.21957	-3.10643	0.0028173	0.00728067	-2.03785	Down-Regulated
C6ORF118	-1.16094	0.245363	-3.12806	0.00248111	0.00650363	-2.04313	Down-Regulated
FKSG83	-1.23071	-0.766693	-3.32773	0.00650309	0.0153169	-2.13453	Down-Regulated
STATH	-1.67898	0.181999	-3.24648	0.00844543	0.019357	-2.32689	Down-Regulated
MC3R	-1.27306	-0.4226	-2.94593	0.00651385	0.0153367	-2.35844	Down-Regulated
TRPC7	-1.15184	-0.347754	-2.97677	0.00434412	0.0106821	-2.36787	Down-Regulated
DGKK	-2.59372	-0.192064	-2.99725	0.00731562	0.0170299	-2.36829	Down-Regulated
GPR6	-1.12738	0.672222	-3.00114	0.00350613	0.0088323	-2.40965	Down-Regulated
NKX2-8	-1.38684	1.39698	-3.00498	0.00340228	0.00859698	-2.42686	Down-Regulated
WFDC11	-1.11395	-0.666079	-2.95303	0.00777783	0.0179936	-2.44624	Down-Regulated
NXF2B	-2.05598	0.910613	-2.93724	0.00498497	0.0120792	-2.46305	Down-Regulated
HS3ST6	-1.00117	-0.15966	-2.92062	0.00474967	0.0115672	-2.56207	Down-Regulated
OBP2B	-1.17242	0.135391	-2.90463	0.00474774	0.0115639	-2.64348	Down-Regulated
OR4C6	-1.31351	0.460481	-2.80421	0.00772405	0.0178797	-2.75547	Down-Regulated
SOX14	-1.69301	-0.254051	-2.79084	0.0123941	0.027062	-2.79564	Down-Regulated
MSMB	-1.43483	3.98659	-2.93359	0.00385195	0.00959592	-2.79723	Down-Regulated
OR6W1P	-1.31929	-0.498857	-2.84538	0.014434	0.0309556	-2.80377	Down-Regulated
COL20A1	-1.0682	-0.111331	-2.83447	0.00583694	0.0139236	-2.82271	Down-Regulated
F13B	-1.128	0.24724	-2.74991	0.00933747	0.0211491	-2.86141	Down-Regulated
CA6	-1.80154	0.00408059	-2.74544	0.00955125	0.0215666	-2.86709	Down-Regulated
AATK-AS1	-1.22125	-0.584237	-2.6959	0.0115107	0.0253968	-2.94105	Down-Regulated
TNNT1	-1.25996	5.38813	-2.88091	0.00446636	0.01095	-2.97988	Down-Regulated
CCK	-1.13031	4.39	-2.85137	0.00490863	0.011922	-3.04183	Down-Regulated
C16ORF92	-1.46013	-0.818219	-2.64213	0.0124559	0.0271791	-3.0496	Down-Regulated
NEUROD4	-2.89302	0.687712	-2.66299	0.0182867	0.038119	-3.05245	Down-Regulated
EMX1	-1.03462	1.77047	-2.82184	0.00545839	0.0131235	-3.05986	Down-Regulated
DPPA3	-1.10949	-0.0673146	-2.678	0.0103509	0.0231555	-3.06167	Down-Regulated
SDC4P	-1.24923	-0.849315	-2.8753	0.0227441	0.0460799	-3.06367	Down-Regulated
TISP43	-1.56742	0.0115224	-2.64485	0.0126659	0.0275763	-3.07174	Down-Regulated
RTBDN	-1.03091	3.11487	-2.84037	0.00505563	0.012231	-3.08283	Down-Regulated
F2	-1.03567	1.07529	-2.77391	0.00638611	0.0150808	-3.14108	Down-Regulated
FABP6	-1.11516	4.23492	-2.80214	0.00572329	0.0136822	-3.14931	Down-Regulated
DPRX	-1.39122	-0.464775	-2.59932	0.0207233	0.0424685	-3.16141	Down-Regulated
PIWIL1	-1.13348	2.62132	-2.78164	0.00608787	0.0144597	-3.19822	Down-Regulated
POU3F4	-1.17902	-0.298565	-2.56562	0.0154817	0.0329278	-3.21135	Down-Regulated
GHRH	-2.67474	0.166631	-2.53201	0.0182048	0.0379802	-3.26664	Down-Regulated
LRRC31	-1.04815	4.69919	-2.76466	0.00633773	0.0149809	-3.2781	Down-Regulated
BRN3B	-1.22207	-0.249546	-2.52952	0.0164936	0.0348105	-3.31597	Down-Regulated
DSCR4	-1.50545	-0.553195	-2.45717	0.0226509	0.0459241	-3.32053	Down-Regulated
TAS2R8	-1.12479	-0.457539	-2.49461	0.0213347	0.0435635	-3.3288	Down-Regulated
LRRC26	-1.02572	2.06081	-2.7048	0.00767506	0.0177767	-3.35963	Down-Regulated
PABPC1L2A	-1.46582	-0.0132717	-2.49897	0.0177276	0.0371295	-3.3619	Down-Regulated
OR52R1	-2.72785	-0.0404837	-4.23152	0.0198795	0.0409302	-3.37251	Down-Regulated
CT45A4	-2.83562	-1.13878	-4.07955	0.0220794	0.0448849	-3.40428	Down-Regulated
CYP4F30P	-1.22788	0.302921	-2.53808	0.0140469	0.0302304	-3.42593	Down-Regulated
CACNG2	-1.36109	0.254802	-2.51453	0.0142437	0.0305974	-3.56309	Down-Regulated
TFF2	-1.09604	10.2997	-2.6162	0.00967641	0.0218194	-3.67497	Down-Regulated
ZIC5	-1.02123	2.29806	-2.56133	0.0115572	0.025471	-3.69445	Down-Regulated
FGG	-1.20905	6.77983	-2.59428	0.0102999	0.0230597	-3.72508	Down-Regulated
TSPAN19	-1.1213	0.0952997	-2.40252	0.0194866	0.0402595	-3.74876	Down-Regulated
LOC100130328	-1.38557	0.805031	-2.41314	0.017957	0.0375504	-3.86464	Down-Regulated
KLK12	-1.24729	1.63737	-2.43566	0.0165438	0.0349015	-3.90123	Down-Regulated
PSAPL1	-1.11149	4.87819	-2.47113	0.0145418	0.0311563	-3.98334	Down-Regulated
LHX1	-1.05544	1.82921	-2.39276	0.0185465	0.0385995	-3.98797	Down-Regulated
NPSR1	-1.36896	4.13626	-2.42807	0.0164741	0.0347729	-4.02854	Down-Regulated
REG4	-1.44755	9.95162	-2.45284	0.0151411	0.0322842	-4.08371	Down-Regulated
SPRR3	-1.1699	5.96313	-2.4059	0.0172358	0.0362107	-4.16132	Down-Regulated
